# Supplementary material for: Social and territorial inequalities in breast and cervical cancers screening uptake: a cross-sectional study in France
Source: PubMed Central journal article supplement — BMJ Open. 2022 Feb 22;12(2):e055363. doi: 10.1136/bmjopen-2021-055363 (PMC8867371; doi:10.1136/bmjopen-2021-055363), 2022-02-22
Supplement: bmjopen-2021-055363.draft_revisions.pdf [file bmjopen-2021-055363.draft_revisions.pdf]

# BMJ Open

BMJ Open is committed to open peer review. As part of this commitment we make the peer review history of every article we publish publicly available.

When an article is published we post the peer reviewers' comments and the authors' responses online. We also post the versions of the paper that were used during peer review. These are the versions that the peer review comments apply to.

The versions of the paper that follow are the versions that were submitted during the peer review process. They are not the versions of record or the final published versions. They should not be cited or distributed as the published version of this manuscript.

BMJ Open is an open access journal and the full, final, typeset and author-corrected version of record of the manuscript is available on our site with no access controls, subscription charges or pay-per-view fees (<http://bmjopen.bmj.com>).

If you have any questions on BMJ Open's open peer review process please email [info.bmjopen@bmj.com](mailto:info.bmjopen@bmj.com)

# BMJ Open

## Social and territorial inequalities in gynaecological cancers screening uptake: a cross-sectional study in France

|                               |                                                                                                                                                                                                                                                                                                                                                                                                                                                                                                                                                                                                                                                                                           |
|-------------------------------|-------------------------------------------------------------------------------------------------------------------------------------------------------------------------------------------------------------------------------------------------------------------------------------------------------------------------------------------------------------------------------------------------------------------------------------------------------------------------------------------------------------------------------------------------------------------------------------------------------------------------------------------------------------------------------------------|
| Journal:                      | <i>BMJ Open</i>                                                                                                                                                                                                                                                                                                                                                                                                                                                                                                                                                                                                                                                                           |
| Manuscript ID                 | bmjopen-2021-055363                                                                                                                                                                                                                                                                                                                                                                                                                                                                                                                                                                                                                                                                       |
| Article Type:                 | Original research                                                                                                                                                                                                                                                                                                                                                                                                                                                                                                                                                                                                                                                                         |
| Date Submitted by the Author: | 13-Jul-2021                                                                                                                                                                                                                                                                                                                                                                                                                                                                                                                                                                                                                                                                               |
| Complete List of Authors:     | <p>Ouanhnon, Lisa; Université Toulouse III Paul Sabatier, DUMG (Département Universitaire de Médecine Générale); INSERM UMR_S 1027, CERPOP</p> <p>Rougé Bugat, Marie-Eve ; Université Toulouse III Paul Sabatier, DUMG (Département Universitaire de Médecine Générale); INSERM UMR_S 1027, CERPOP</p> <p>LAMY, Sebastien; Institute Claudius Regaud; INSERM UMR_S 1027</p> <p>Druel, Vladimir; Université Toulouse III Paul Sabatier, DUMG (Département Universitaire de Médecine Générale); INSERM UMR_S 1027, CERPOP</p> <p>Delpierre, Cyrille; INSERM UMR_S 1027; Université Toulouse III Paul Sabatier,</p> <p>Grosclaude, Pascale; INSERM UMR_S 1027; Institute Claudius Regaud</p> |
| Keywords:                     | Gynaecological oncology < GYNAECOLOGY, GENERAL MEDICINE (see Internal Medicine), Health policy < HEALTH SERVICES ADMINISTRATION & MANAGEMENT, Organisation of health services < HEALTH SERVICES ADMINISTRATION & MANAGEMENT, SOCIAL MEDICINE, PREVENTIVE MEDICINE                                                                                                                                                                                                                                                                                                                                                                                                                         |
|                               |                                                                                                                                                                                                                                                                                                                                                                                                                                                                                                                                                                                                                                                                                           |

SCHOLARONE™  
Manuscripts

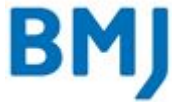

I, the Submitting Author has the right to grant and does grant on behalf of all authors of the Work (as defined in the below author licence), an exclusive licence and/or a non-exclusive licence for contributions from authors who are: i) UK Crown employees; ii) where BMJ has agreed a CC-BY licence shall apply, and/or iii) in accordance with the terms applicable for US Federal Government officers or employees acting as part of their official duties; on a worldwide, perpetual, irrevocable, royalty-free basis to BMJ Publishing Group Ltd ("BMJ") its licensees and where the relevant Journal is co-owned by BMJ to the co-owners of the Journal, to publish the Work in this journal and any other BMJ products and to exploit all rights, as set out in our [licence](#).

The Submitting Author accepts and understands that any supply made under these terms is made by BMJ to the Submitting Author unless you are acting as an employee on behalf of your employer or a postgraduate student of an affiliated institution which is paying any applicable article publishing charge ("APC") for Open Access articles. Where the Submitting Author wishes to make the Work available on an Open Access basis (and intends to pay the relevant APC), the terms of reuse of such Open Access shall be governed by a Creative Commons licence – details of these licences and which [Creative Commons](#) licence will apply to this Work are set out in our licence referred to above.

Other than as permitted in any relevant BMJ Author's Self Archiving Policies, I confirm this Work has not been accepted for publication elsewhere, is not being considered for publication elsewhere and does not duplicate material already published. I confirm all authors consent to publication of this Work and authorise the granting of this licence.

1  
2  
3 Title: Social and territorial inequalities in gynaecological cancers screening uptake: a cross-  
4 sectional study in France  
5  
6  
7  
8

9 Authors: Lisa Ouahnnon<sup>1,2</sup>, Marie-Eve Rouge Bugat<sup>1,2</sup>, Sébastien Lamy<sup>2,4</sup> Vladimir Druel<sup>1,2</sup>,  
10 Cyrille Delpierre<sup>2,3,\*</sup>, Pascale Grosclaude<sup>2,3,4,\*</sup>  
11  
12  
13

14  
15  
16 Authors affiliations:  
17

18 <sup>1</sup> DUMG (Département Universitaire de Médecine Générale), Université Toulouse 3 Paul  
19 Sabatier, France  
20

21  
22 <sup>2</sup> CERPOP, Université de Toulouse, Inserm, UPS, Toulouse, France  
23

24  
25 <sup>3</sup> Equipe Labellisée Ligue Contre le Cancer  
26

27 <sup>4</sup> Institut Claudius Regaud, IUCT-O, Registre des cancers du Tarn, Toulouse, France  
28

29  
30 \* these two authors have equally supervised the work  
31

32 The research team is supported by the French association “La Ligue contre le cancer”.  
33  
34  
35

36  
37 Corresponding author: Lisa Ouahnnon, 87 rue du Faubourg Bonnefoy 31500 Toulouse,  
38 France, lisa.ouahnnon@gmail.com, +33661594978  
39  
40  
41

42  
43 Word counts of the main text: 3037 and abstract: 278 words  
44

45  
46 Number of tables, figures and appendixes: 3 tables, 2 figures and 6 appendixes (2 tables A, 4  
47 tables B)  
48  
49  
50  
51  
52  
53  
54  
55  
56  
57  
58  
59  
60

## Abstract

**Objective** The objective of this cross-sectional study was to investigate the impact of socio-territorial characteristics on mammography and pap smear uptake in the recommended age groups, and secondly outside the recommended age groups.

**Setting and participants** We used an existing dataset of 1,027,039 women which combines data from the Health Insurance information systems, with census data from Midi-Pyrénées, France.

**Primary and secondary outcome measures** Our outcome was, for each woman, the uptake of the pap smear and the uptake of the mammography during the year.

**Results** A social gradient of gynaecological cancers screening uptake was found. This gradient was stronger in large urban areas:

- For mammography: decile 10 [the most deprived] vs 1 [the least deprived], adjusted OR= 0.777, 95%CI [0.748,0.808] in large urban area; adjusted OR= 0.808 for decile 1 to 0.726 for decile 10 in other areas vs decile 1 in urban areas ;
- For pap smear: decile 10 vs 1 adjusted OR= 0.66, 95%CI [0.642,0.679] in large urban areas; adjusted OR= 0.747 for decile 1 to 0.562 for decile 10 in other areas vs decile 1 in urban areas).

Screening rates were globally higher in large urban areas. For mammography, the social and territorial disparities were higher outside the recommended age group.

**Conclusions** Offering a universal approach to every woman, as it is often the case in nationally organised screening programmes, is likely to be insufficient to ensure real equity in access. Developing global dataset combining health data and diverse socioeconomic data, at individual and contextual levels, could enable a better understanding of the mechanisms involved in this

1  
2  
3 social gradient, and therefore the development of targeted territorial actions to improve equity  
4  
5 of access to healthcare.  
6  
7  
8  
9  
10  
11  
12  
13

#### 14 Keywords

15  
16  
17 Breast cancer screening; Cervical cancer screening; Screening programme participation;  
18  
19 Women health; Socioeconomic inequalities; Geographic inequalities; Deprivation index.  
20  
21

#### 22 Strengths and limitations of this study

- 23  
24  
25
- 26 • The use of health insurance data, merged with socio-territorial information, allowed for  
27 a very powerful and comprehensive study on social inequalities in health (database of  
28 2.5 million of individuals or 88% of the region's total population ).  
29  
30
  - 31 • We used both individual and contextual variables to investigate the link between an  
32 ecological deprivation index and gynaecological cancers screening.  
33  
34
  - 35 • We performed a sequential regression (variables were successively added in the  
36 multivariable model) to investigate the role of each variable in the link between the  
37 ecological deprivation index and screening and studied the interaction between EDI and  
38 the type of place of residence  
39  
40  
41  
42  
43  
44
  - 45 • Our data covered only 1 year and we had a limited number of individual and contextual  
46 variables in our dataset.  
47  
48  
49  
50  
51  
52  
53  
54  
55  
56  
57  
58  
59  
60

1  
2  
3 Abbreviations:  
4

5  
6 CMU-C: Couverture Médicale Universelle-Complémentaire (Supplementary Universal  
7  
8 Healthcare Coverage)  
9

10  
11 EDI: European deprivation Index  
12

13  
14 GP: General Practitioner  
15

16  
17 INSEE: Institut National de la Statistique et des Etudes Economiques (French National  
18  
19 Institute of Statistics and Economic Studies)  
20

21  
22 IRIS: Ilots Regroupés pour l'Information statistique (aggregated units for statistical  
23  
24 information)  
25

26  
27 OR: Odds-Ratio  
28

29  
30 PLA: Potential Localised Accessibility  
31

32  
33 SEP: Socioeconomic Position  
34  
35  
36  
37  
38  
39  
40  
41  
42  
43  
44  
45  
46  
47  
48  
49  
50  
51  
52  
53  
54  
55  
56  
57  
58  
59  
60

## 1. Introduction

Breast and cervical cancers are the two most frequent gynaecological cancers in the world. They kill more than 600,000 and 300,000 women, respectively, every year (1).

For breast cancer in France, through the nationally organised screening programme, all women between 50 and 74 years old are offered a mammography every 2 years (2). For cervical cancer, a national screening programme is progressively being implemented (3). Before 2018, guidelines recommended a pap smear every 3 years between 25 and 65 years old.

In France, the participation rate is around 50% for breast cancer screening and 60% for cervical cancer (4). Despite an universal health coverage policy, mammography and pap smear uptake, and therefore breast and cervical cancer survival, vary considerably with factors like socioeconomic position (SEP) and place of residence (5–8). This raises the question of the determinants of universal access, in particular physical accessibility (availability, reasonable reach), financial affordability (healthcare cost, transportation, time away from work) and sociocultural accessibility (perceived effectiveness, social and cultural factors) (9,10). All these dimensions may be socially distributed and partly explain the inequalities of screening uptake.

Disentangling underlying mechanisms leading to these inequalities is a first step to address them. However, further studies on this topic have been made difficult by the lack of large and representative dataset combining socioeconomic, territorial, and healthcare data (11).

We used French healthcare insurance reimbursement data, merged with socio-territorial information, to assess and investigate the influence of deprivation, and of the place of residence, on mammography and pap smear uptake in the recommended age groups. We also explored the influence of these factors for women outside the recommended age groups.



## 2. Methods

### *Study design*

We used a dataset combining data from health insurance information systems with census data, based on the address of residence. This dataset has been described in detail elsewhere (12).

The health data was prospectively collected by the three main health insurance providers for 2012.

### *Population*

This dataset included individuals who were beneficiaries of any of the three health insurance providers on the 31<sup>st</sup> of December 2012 in Midi-Pyrénées. The individuals with an incomplete address or with differences in the management of their data were excluded. We obtained a base of 2,574,310 subjects (88% of the region's total population).

For this study, we focused on women over 20 years old (1,027,039 women), as gynaecological cancers screening is rarely offered to women below that age.

### *Patient and public involvement*

Patients or the public were not involved in the design of our study.

### *Collected variables*

#### - Main outcomes

Our outcome was, for each woman, the uptake of the pap smear and the uptake of the mammography. It was categorised as a binary variable for each screening test to discriminate the women who had at least one mammography/pap smear during the year, and the other ones.

#### - Main explanatory variables

1  
2  
3 In the absence of individual social data, social condition of the participants was approached by  
4 an ecological deprivation index, the European Deprivation Index (13). The EDI approaches  
5 SEP by measuring social deprivation as defined by Townsend as “a state of observable and  
6 demonstrable disadvantage relative to the local community or the wider society to which an  
7 individual, family or group belongs”. To calculate the EDI, we used the aggregated unit for  
8 statistical information (‘IRIS’) corresponding to the person’s address. IRIS is the smallest  
9 geographical unit for which statistics are available in France, which represents about 2,000  
10 inhabitants. Each IRIS was assigned an EDI value, calculated with census data. We used an  
11 EDI presentation in deciles, calculated from all the IRISs of the region: decile 1 corresponds to  
12 the least deprived zones, decile 10 to the most deprived zones.  
13  
14  
15  
16  
17  
18  
19  
20  
21  
22  
23  
24  
25  
26  
27

#### 28 - Covariates

29 We considered age as a potential confounder. As the association between this variable and the  
30 outcomes clearly appeared non-linear, we categorised it (into 5-year groups).  
31  
32  
33  
34  
35

36 As an ecological index of deprivation, EDI is assumed to be capturing both intrinsic properties  
37 of the individuals in the area and contextual properties of the area (14). To explore the  
38 mechanisms involved in the link between EDI and screening uptake, we chose to study various  
39 factors, including one individual and one contextual:  
40  
41  
42  
43  
44  
45

- 46 - The Supplementary Universal Healthcare Coverage (CMU-C), is offered to individuals  
47 who earn less than a defined income threshold, to pay for their healthcare expenses. This  
48 characteristic was used as a proxy for individual financial precarity. Our hypothesis was  
49 that financial precarity, by limiting financial accessibility, was key in the link between  
50 deprivation and screening participation.  
51  
52  
53  
54  
55
- 56 - Healthcare supply is a contextual property influencing deprivation. We assumed that  
57 this factor could partly explain the link between EDI and screening uptake by measuring  
58  
59  
60

1  
2  
3 physical accessibility. Healthcare supply at IRIS level was approached by the Potential  
4 Localised Accessibility (PLA) to the GP. The PLA calculates the distance-weighted  
5 supply and the local demand, measured by the age-differentiated rate of access. It is  
6 interpreted as a medical density (number of full-time equivalents for 100 000  
7 inhabitants) (15).  
8  
9  
10  
11  
12  
13  
14

15 We assumed that the overall healthcare system adherence could also explain part of the  
16 association between deprivation and screening uptake. Therefore, we used a binary variable  
17 that discriminates between the patients who had no designated referring physician (in most  
18 cases a General Practitioner (GP)) and the ones who had one. This health-seeking behaviour is  
19 a property of individuals but is likely to be influenced by both individual and contextual factors  
20 (16).  
21  
22  
23  
24  
25  
26  
27  
28  
29

30 Healthcare supply and transport facilities are very different in rural and urban areas (17–19).  
31 We assumed that the level of urbanisation of the place of residence could modify the social  
32 gradient of screening uptake. Based on the French National Institute of Statistics and Economic  
33 Studies (INSEE)'s 2010 zoning in urban areas, we built a variable to distinguish the large urban  
34 areas (more than 10 000 jobs) and their suburbs, from the rest of the region. In the descriptive  
35 analysis, we differentiated among large urban areas between Toulouse metropolis, the regional  
36 capital which covers almost a quarter of the region's population, and the other areas.  
37  
38  
39  
40  
41  
42  
43  
44  
45

46 Our conceptual model showing how these variables interact is presented in Figure 1.  
47  
48  
49  
50  
51

### 52 *Statistical analysis*

53 To describe the sample, we performed univariate analyses: we tested the association between  
54 the main explanatory variable and the outcomes, between each covariate and the outcomes, and  
55 between each covariate and the EDI.  
56  
57  
58  
59  
60

1  
2  
3 We used a multivariable logistic regression model to analyse the association between EDI and  
4 the mammography and pap smear uptake, adjusted for all the previously identified confounders  
5 and intermediate variables. We performed a sequential regression. The variables were  
6 successively added to the model following a pre-defined order: the main explanatory variable  
7 alone first, then the confounder, and lastly the intermediate variables (at an individual then at a  
8 contextual level).  
9

10  
11 We studied the interaction between EDI and the type of place of residence (large urban/other  
12 areas) in the model through a new variable: a 20-modal indicator with ten modalities  
13 (corresponding to the EDI deciles) per type of geographical area.  
14

15  
16 We undertook some age groups analyses to study women outside the recommended age groups  
17 (younger and older). For younger women, we focused on women aged 20 to 25 for pap smear  
18 and 40 to 50 for mammography. Our hypothesis was that social and territorial inequalities were  
19 higher for women outside the recommended age groups.  
20

21  
22 Since we used data that are systematically recorded by health insurance providers, we expected  
23 very little missing data. This was therefore negligible in light of the global sample size (around  
24 0.01%): a complete case analysis could be used.  
25

26  
27 Statistical analyses were performed with R software (R x64 3.0.2) (20).  
28  
29  
30  
31  
32

### 33 3. Results 34 35 36 37 38 39

40  
41 Selected population in the recommended age groups for mammography (50-74 years old) and  
42 pap smear (25-65 years old), were composed of 365 947 and 711 803 women respectively  
43 (Table 1). Among these women, 31% had had at least one mammography during the year, and  
44 29% at least one pap smear. Almost two thirds of the population lived in large urban areas. A  
45 major part of the most disadvantaged women lived in the Toulouse metropolis (Supplementary  
46 material Appendix 1, Tables A). Around 8% of the 25-65 women and less than 4% of the 50-  
47  
48  
49  
50  
51  
52  
53  
54  
55  
56  
57  
58  
59  
60

1  
2  
3 74 had the CMU-C. 92% of the 25-65 women and 95% of the 50-74 had a designated referring  
4 physician.  
5  
6

7  
8 The more deprived the area of residence, the lower the gynaecological cancers screening  
9 uptakes ( $p$ -value  $< 0.001$ ) (Table 1). Regarding age, the mammography rate seemed rather  
10 constant throughout the recommended ages. Pap smear uptake decreased a lot after 55 years  
11 old (from 31% to 23% between the 45-50 and the 55–60-year-old groups). Women with CMU-  
12 C had a lower screening uptake rate. We noticed a slight territorial gradient: the higher the GP  
13 density, the higher the mammography and pap smear uptake, except for the last two deciles.  
14  
15 The women living in large urban areas had a higher screening rate than the ones living in the  
16 rest of the region. Women who had a designated referring physician had a higher screening rate  
17 (32% vs 5% for mammography, 31% vs 8% for pap smear,  $p$ -value  $< 0.001$ ).  
18  
19

20  
21 Adding the interaction term between EDI and the type of place of residence (large urban/other  
22 areas) improved our models (better likelihood,  $p$ -value= 0.0048 for mammography uptake and  
23 0.0040 for pap smear uptake). Tables 2 and 3 present the logistic regression of mammography  
24 and pap smear uptake in the recommended age groups: first the odds-ratios associated with the  
25 variable combining EDI and the type of place of residence (large urban/other areas), then the  
26 result of the sequential adjustments, and lastly the final multivariable regression model.  
27  
28

29  
30 For mammography (Table 2), an effect of EDI on mammography uptake was observed, through  
31 a social gradient: the screening uptake regularly decreased with increasing deprivation. This  
32 social gradient was mostly observed in large urban areas (decile 10 vs 1 adjusted OR= 0.777,  
33 95%CI [0.748,0.808]). There was no social gradient in the other areas, where mammography  
34 rate was globally lower than in urban areas. Influence of financial precarity was corroborated  
35 by CMU-C impact on screening uptake (adjusted OR= 0.644, 95%CI [0.618; 0.671]). The  
36 territorial gradient based on GP accessibility was confirmed. Adding this variable decreased  
37 only slightly the difference between large urban and other areas. The link between  
38  
39  
40  
41  
42  
43  
44  
45  
46  
47  
48  
49  
50  
51  
52  
53  
54  
55  
56  
57  
58  
59  
60

1  
2  
3 mammography and having a designated referring physician was confirmed as well (adjusted  
4 OR = 8.45, 95%CI [7.946; 8.996]). Age had a very limited effect on mammography uptake.  
5  
6 Sequential inclusion of all these variables in the model modified only slightly the link between  
7  
8 EDI and screening uptake.  
9  
10

11  
12  
13  
14 For pap smear (Table 3), a strong social gradient was observed. This gradient was slightly  
15 stronger in large urban areas (decile 10 vs 1 adjusted OR= 0.66, 95%CI [0.642,0.679]) than in  
16 the rest of the region (adjusted OR= 0.747 for decile 1 to 0.562 for decile 10 in other areas vs  
17 decile 1 in urban areas). Influence of financial precarity was corroborated by CMU-C impact  
18 on screening uptake (adjusted OR= 0.669). The territorial gradient (based on GP accessibility)  
19 was confirmed but, as for mammography, adding this variable decreased only slightly the  
20 difference between large urban and other areas. The multivariable analysis confirmed the  
21 association between having a designated referring physician and pap smear uptake (adjusted  
22 OR = 5.39 95%CI [5.227; 5.557]). An effect of age on pap smear uptake was also found  
23 (adjusted OR= 0.59, 95% CI [0.574; 0.601] for 55-60 year-old women vs 25-30 women).  
24 Sequential inclusion of all these variables in the model modified only slightly the link between  
25  
26 EDI and screening uptake.  
27  
28  
29  
30  
31  
32  
33  
34  
35  
36  
37  
38  
39  
40  
41  
42

43 We used the same approach for women outside the recommended age groups (Figure 2 &  
44 supplementary material Appendix 2, Tables B). Among younger women (40-50 years old for  
45 mammography and 20-25 for pap smear), both mammography and pap smear uptakes in the  
46 year were around 21%. Among women older than the recommended age, participation rates  
47 were around 6% for both breast and cervical cancers. Figure 2 shows that the social gradient in  
48 mammography uptake was substantially stronger in women between the ages of 40 and 50, and  
49 more so in large urban areas. For pap smear uptake, social gradient seemed less strong in  
50  
51  
52  
53  
54  
55  
56  
57  
58  
59  
60

1  
2  
3 younger women. Regarding GP accessibility, we observed a stronger territorial gradient for  
4  
5 older women, for both screening uptakes.  
6  
7  
8  
9  
10  
11  
12  
13  
14  
15  
16  
17  
18  
19  
20  
21  
22  
23  
24  
25  
26  
27  
28  
29  
30  
31  
32  
33  
34  
35  
36  
37  
38  
39  
40  
41  
42  
43  
44  
45  
46  
47  
48  
49  
50  
51  
52  
53  
54  
55  
56  
57  
58  
59  
60

For peer review only

|                       | <b>Total<br/>50-74 y.o<br/>N=365 947<br/>N (%)</b> | <b>No<br/>mammography<br/>n (%)<br/>n= 253 354<br/>(69.23)</b> | <b>≥ 1 mammography<br/>n (%)<br/>n= 112 593<br/>(30.77)</b> | <b>Total<br/>25-65 y.o<br/>N=711 803<br/>N (%)</b> | <b>No pap smear<br/>n (%)<br/>n= 506 731<br/>(71.19)</b> | <b>≥ 1 pap smear<br/>n (%)<br/>n= 205 072<br/>(28.81)</b> |
|-----------------------|----------------------------------------------------|----------------------------------------------------------------|-------------------------------------------------------------|----------------------------------------------------|----------------------------------------------------------|-----------------------------------------------------------|
| <b>EDI</b>            |                                                    |                                                                |                                                             |                                                    |                                                          |                                                           |
| 1 (best)              | 31201 (8.53)                                       | 20675 (66.26)                                                  | 10526 (33.74)                                               | 62238 (8.74)                                       | 40787 (65.53)                                            | 21451 (34.47)                                             |
| 2                     | 34826 (9.52)                                       | 23263 (66.8)                                                   | 11563 (33.2)                                                | 70952 (9.97)                                       | 47640 (67.14)                                            | 23312 (32.86)                                             |
| 3                     | 30111 (8.23)                                       | 20414 (67.8)                                                   | 9697 (32.2)                                                 | 60763 (8.54)                                       | 41703 (68.63)                                            | 19060 (31.37)                                             |
| 4                     | 31564 (8.63)                                       | 21596 (68.42)                                                  | 9968 (31.58)                                                | 60572 (8.51)                                       | 42269 (69.78)                                            | 18303 (30.22)                                             |
| 5                     | 32733 (8.94)                                       | 22750 (69.5)                                                   | 9983 (30.5)                                                 | 65031 (9.14)                                       | 46072 (70.85)                                            | 18959 (29.15)                                             |
| 6                     | 39518 (10.8)                                       | 27130 (68.65)                                                  | 12388 (31.35)                                               | 73464 (10.32)                                      | 53153 (72.35)                                            | 20311 (27.65)                                             |
| 7                     | 38825 (10.61)                                      | 27107 (69.82)                                                  | 11718 (30.18)                                               | 72276 (10.15)                                      | 52119 (72.11)                                            | 20157 (27.89)                                             |
| 8                     | 37868 (10.35)                                      | 26309 (69.48)                                                  | 11559 (30.52)                                               | 70412 (9.89)                                       | 51084 (72.55)                                            | 19328 (27.45)                                             |
| 9                     | 42390 (11.58)                                      | 29998 (70.77)                                                  | 12392 (29.23)                                               | 82232 (11.55)                                      | 60646 (73.75)                                            | 21586 (26.25)                                             |
| 10 (worst)            | 46911 (12.82)                                      | 34112 (72.72)                                                  | 12799 (27.28)                                               | 93863 (13.19)                                      | 71258 (75.92)                                            | 22605 (24.08)                                             |
| <b>Age (/5years)</b>  |                                                    |                                                                |                                                             |                                                    |                                                          |                                                           |
| 25-30 y.o.            | -                                                  | -                                                              | -                                                           | 82413 (11.58)                                      | 56617 (68.7)                                             | 25796 (31.3)                                              |
| 30-35 y.o.            | -                                                  | -                                                              | -                                                           | 88249 (12.4)                                       | 58932 (66.78)                                            | 29317 (33.22)                                             |
| 35-40 y.o.            | -                                                  | -                                                              | -                                                           | 85200 (11.97)                                      | 57150 (67.08)                                            | 28050 (32.92)                                             |
| 40-45 y.o.            | -                                                  | -                                                              | -                                                           | 92964 (13.06)                                      | 63042 (67.81)                                            | 29922 (32.19)                                             |
| 45-50 y.o.            | -                                                  | -                                                              | -                                                           | 94291 (13.25)                                      | 64872 (68.8)                                             | 29419 (31.2)                                              |
| 50-55 y.o.            | 88241 (24.11)                                      | 61449 (69.64)                                                  | 26792 (30.36)                                               | 88241 (12.4)                                       | 64145 (72.69)                                            | 24096 (27.31)                                             |
| 55-60 y.o.            | 83126 (22.72)                                      | 57836 (69.58)                                                  | 25290 (30.42)                                               | 83126 (11.68)                                      | 64120 (77.14)                                            | 19006 (22.86)                                             |
| 60-65 y.o.            | 81209 (22.19)                                      | 55168 (67.93)                                                  | 26041 (32.07)                                               | 81209 (11.41)                                      | 64544 (79.48)                                            | 16665 (20.52)                                             |
| 65-70 y.o.            | 64794 (17.71)                                      | 44289 (68.35)                                                  | 20505 (31.65)                                               | 16110 (2.26) <sup>1</sup>                          | 13309 (82.61)                                            | 2801 (17.39)                                              |
| 70-75 y.o.            | 48577 (13.27)                                      | 34612 (71.25)                                                  | 13965 (28.75)                                               | -                                                  | -                                                        | -                                                         |
| <b>CMU-C</b>          |                                                    |                                                                |                                                             |                                                    |                                                          |                                                           |
| No CMU-C              | 351872 (96.15)                                     | 242406 (68.89)                                                 | 109466 (31.11)                                              | 655969 (92.16)                                     | 463517 (70.66)                                           | 192452 (29.34)                                            |
| CMU-C                 | 14075 (3.85)                                       | 10948 (77.78)                                                  | 3127 (22.22)                                                | 55834 (7.84)                                       | 43214 (77.4)                                             | 12620 (22.6)                                              |
| <b>GP PLA</b>         |                                                    |                                                                |                                                             |                                                    |                                                          |                                                           |
| 1 (worst)             | 11427 (3.12)                                       | 8212 (71.86)                                                   | 3215 (28.14)                                                | 18607 (2.61)                                       | 13784 (74.08)                                            | 4823 (25.92)                                              |
| 2                     | 13767 (3.76)                                       | 9738 (70.73)                                                   | 4029 (29.27)                                                | 24385 (3.43)                                       | 17816 (73.06)                                            | 6569 (26.94)                                              |
| 3                     | 14455 (3.95)                                       | 10195 (70.53)                                                  | 4260 (29.47)                                                | 26121 (3.67)                                       | 18888 (72.31)                                            | 7233 (27.69)                                              |
| 4                     | 20582 (5.62)                                       | 14258 (69.27)                                                  | 6324 (30.73)                                                | 37307 (5.24)                                       | 26610 (71.33)                                            | 10697 (28.67)                                             |
| 5                     | 26405 (7.22)                                       | 18029 (68.28)                                                  | 8376 (31.72)                                                | 49815 (7)                                          | 35139 (70.54)                                            | 14676 (29.46)                                             |
| 6                     | 32262 (8.82)                                       | 21930 (67.97)                                                  | 10332 (32.03)                                               | 63615 (8.94)                                       | 44311 (69.65)                                            | 19304 (30.35)                                             |
| 7                     | 50863 (13.9)                                       | 34371 (67.58)                                                  | 16492 (32.42)                                               | 98949 (13.9)                                       | 68782 (69.51)                                            | 30167 (30.49)                                             |
| 8                     | 62331 (17.03)                                      | 42592 (68.33)                                                  | 19739 (31.67)                                               | 123460 (17.34)                                     | 86465 (70.03)                                            | 36995 (29.97)                                             |
| 9                     | 64131 (17.52)                                      | 44615 (69.57)                                                  | 19516 (30.43)                                               | 127253 (17.88)                                     | 90793 (71.35)                                            | 36460 (28.65)                                             |
| 10 (best)             | 69724 (19.05)                                      | 49414 (70.87)                                                  | 20310 (29.13)                                               | 142291 (19.99)                                     | 104143 (73.19)                                           | 38148 (26.81)                                             |
| <b>Urbanisation</b>   |                                                    |                                                                |                                                             |                                                    |                                                          |                                                           |
| Toulouse              | 72919 (19.93)                                      | 49978 (68.54)                                                  | 22941 (31.46)                                               | 180030 (25.59)                                     | 123038 (68.34)                                           | 56992 (31.66)                                             |
| Large urban areas     | 150755 (41.2)                                      | 102663 (68.1)                                                  | 48092 (31.9)                                                | 302563 (42.51)                                     | 211072 (69.76)                                           | 91491 (30.24)                                             |
| Other areas           | 142273 (38.88)                                     | 100713 (70.79)                                                 | 41560 (29.21)                                               | 229210 (32.2)                                      | 172621 (75.31)                                           | 56589 (24.69)                                             |
| <b>RP<sup>2</sup></b> |                                                    |                                                                |                                                             |                                                    |                                                          |                                                           |
| No                    | 20032 (5.47)                                       | 18963 (94.66)                                                  | 1069 (5.34)                                                 | 57596 (8.09)                                       | 52948 (91.93)                                            | 4648 (8.07)                                               |
| Yes                   | 345915 (94.53)                                     | 234391 (67.76)                                                 | 111524 (32.24)                                              | 654207 (91.91)                                     | 453783 (69.36)                                           | 200424 (30.64)                                            |

**Table1: Socio-demographic characteristics of women**

<sup>1</sup> Only 65 y.o. women

<sup>2</sup> RP : Designated referring physician

\*: p-value <0.001



**Table 2: Mammography uptake in recommended age group: multivariable logistic regression models (mammography uptake = 30.77%)**

|                                                 |                    | N           | Model 1             | LogLik  | Model 2              | LogLik  | Model 3              | LogLik  | Model 4              | LogLik  | Model 5              | LogLik  |
|-------------------------------------------------|--------------------|-------------|---------------------|---------|----------------------|---------|----------------------|---------|----------------------|---------|----------------------|---------|
|                                                 |                    | Tot= 365947 | OR (95%CI)          | -225465 | OR (95%CI)           | -225373 | OR (95%CI)           | -225160 | OR (95%CI)           | -225115 | OR (95%CI)           | -220891 |
| <b>Combined EDI and large urban/other areas</b> | 1 <sup>3</sup>     | 2 719       | 1                   |         | 1                    |         | 1                    |         | 1                    |         | 1                    |         |
|                                                 | 2                  | 5 896       | 0.981 (0.948,1.016) |         | 0.982 (0.948,1.016)  |         | 0.983 (0.95,1.018)   |         | 0.983 (0.949,1.018)  |         | 0.976 (0.942,1.011)  |         |
|                                                 | 3                  | 10 112      | 0.967 (0.931,1.005) |         | 0.968 (0.932,1.006)  |         | 0.971 (0.934,1.009)  |         | 0.968 (0.932,1.007)  |         | 0.962 (0.925,1)      |         |
|                                                 | 4                  | 13 232      | 0.933 (0.897,0.97)  |         | 0.934 (0.898,0.971)  |         | 0.939 (0.902,0.976)  |         | 0.934 (0.897,0.971)  |         | 0.927 (0.891,0.965)  |         |
|                                                 | 5                  | 12 730      | 0.889 (0.856,0.924) |         | 0.89 (0.857,0.925)   |         | 0.897 (0.863,0.933)  |         | 0.9 (0.865,0.936)    |         | 0.897 (0.862,0.933)  |         |
|                                                 | 6                  | 19 906      | 0.928 (0.893,0.965) |         | 0.929 (0.894,0.966)  |         | 0.936 (0.901,0.973)  |         | 0.932 (0.896,0.969)  |         | 0.927 (0.891,0.964)  |         |
| EDI (deciles) in large urban areas              | 7                  | 20 092      | 0.849 (0.816,0.883) |         | 0.85 (0.817,0.884)   |         | 0.858 (0.825,0.892)  |         | 0.861 (0.826,0.896)  |         | 0.864 (0.83,0.9)     |         |
|                                                 | 8                  | 20 741      | 0.872 (0.837,0.908) |         | 0.873 (0.838,0.909)  |         | 0.885 (0.85,0.922)   |         | 0.893 (0.857,0.931)  |         | 0.895 (0.858,0.933)  |         |
|                                                 | 9                  | 20 679      | 0.838 (0.807,0.871) |         | 0.84 (0.809,0.872)   |         | 0.855 (0.823,0.888)  |         | 0.86 (0.827,0.895)   |         | 0.867 (0.833,0.903)  |         |
|                                                 | 10                 | 16 166      | 0.733 (0.708,0.759) |         | 0.734 (0.709,0.76)   |         | 0.763 (0.737,0.79)   |         | 0.771 (0.742,0.801)  |         | 0.777 (0.748,0.808)  |         |
|                                                 | 1                  | 28 482      | 0.782 (0.718,0.853) |         | 0.783 (0.718,0.854)  |         | 0.784 (0.719,0.855)  |         | 0.811 (0.743,0.884)  |         | 0.808 (0.74,0.882)   |         |
|                                                 | 2                  | 28 930      | 0.841 (0.791,0.893) |         | 0.842 (0.792,0.894)  |         | 0.845 (0.795,0.897)  |         | 0.861 (0.81,0.915)   |         | 0.855 (0.804,0.91)   |         |
|                                                 | 3                  | 19 999      | 0.814 (0.775,0.855) |         | 0.814 (0.775,0.855)  |         | 0.817 (0.778,0.858)  |         | 0.838 (0.798,0.881)  |         | 0.834 (0.793,0.877)  |         |
| EDI (deciles) in other areas                    | 4                  | 18 332      | 0.829 (0.793,0.866) |         | 0.829 (0.793,0.867)  |         | 0.833 (0.797,0.871)  |         | 0.845 (0.808,0.883)  |         | 0.84 (0.803,0.879)   |         |
|                                                 | 5                  | 20 003      | 0.777 (0.742,0.813) |         | 0.777 (0.742,0.813)  |         | 0.78 (0.746,0.817)   |         | 0.797 (0.761,0.835)  |         | 0.794 (0.758,0.832)  |         |
|                                                 | 6                  | 19 612      | 0.831 (0.799,0.864) |         | 0.832 (0.801,0.866)  |         | 0.838 (0.805,0.871)  |         | 0.847 (0.815,0.881)  |         | 0.846 (0.813,0.881)  |         |
|                                                 | 7                  | 18 733      | 0.816 (0.785,0.848) |         | 0.817 (0.786,0.85)   |         | 0.824 (0.792,0.857)  |         | 0.834 (0.801,0.867)  |         | 0.829 (0.797,0.863)  |         |
|                                                 | 8                  | 17 127      | 0.824 (0.793,0.857) |         | 0.825 (0.794,0.858)  |         | 0.833 (0.802,0.866)  |         | 0.846 (0.813,0.88)   |         | 0.842 (0.809,0.876)  |         |
|                                                 | 9                  | 21 711      | 0.751 (0.722,0.78)  |         | 0.751 (0.722,0.781)  |         | 0.762 (0.733,0.792)  |         | 0.767 (0.737,0.798)  |         | 0.767 (0.737,0.799)  |         |
|                                                 | 10                 | 30 745      | 0.702 (0.672,0.732) |         | 0.703 (0.674,0.734)  |         | 0.718 (0.688,0.75)   |         | 0.729 (0.698,0.762)  |         | 0.726 (0.694,0.759)  |         |
| <b>Age (y.o)</b>                                | 50-55 <sup>3</sup> | 88 241      |                     |         | 1                    |         | 1                    |         | 1                    |         | 1                    |         |
|                                                 | 55-60              | 83 126      |                     |         | 1.006 (0.985; 1.027) |         | 1.002 (0.982; 1.023) |         | 1.002 (0.982; 1.023) |         | 0.997 (0.977; 1.018) |         |
|                                                 | 60-65              | 81 209      |                     |         | 1.088 (1.066; 1.111) |         | 1.077 (1.055; 1.099) |         | 1.077 (1.055; 1.1)   |         | 1.066 (1.044; 1.088) |         |
|                                                 | 65-70              | 64 794      |                     |         | 1.07 (1.047; 1.094)  |         | 1.052 (1.029; 1.076) |         | 1.052 (1.029; 1.076) |         | 1.035 (1.012; 1.058) |         |
|                                                 | 70-75              | 48 577      |                     |         | 0.938 (0.916; 0.961) |         | 0.919 (0.897; 0.942) |         | 0.919 (0.897; 0.942) |         | 0.897 (0.875; 0.919) |         |
| <b>CMU-C</b>                                    | No <sup>3</sup>    | 351 872     |                     |         |                      |         | 1                    |         | 1                    |         | 1                    |         |
|                                                 | Yes                | 14 075      |                     |         |                      |         | 0.659 (0.633; 0.686) |         | 0.659 (0.633; 0.687) |         | 0.644 (0.618; 0.671) |         |
| <b>GP PLA</b>                                   | 1 <sup>3</sup>     | 11 427      |                     |         |                      |         |                      |         | 1                    |         | 1                    |         |
|                                                 | 2                  | 13 767      |                     |         |                      |         |                      |         | 1.023 (0.968; 1.081) |         | 1.013 (0.958; 1.072) |         |
|                                                 | 3                  | 14 455      |                     |         |                      |         |                      |         | 1.027 (0.972; 1.084) |         | 1.018 (0.964; 1.076) |         |
|                                                 | 4                  | 20 582      |                     |         |                      |         |                      |         | 1.068 (1.015; 1.124) |         | 1.054 (1.002; 1.11)  |         |
|                                                 | 5                  | 26 405      |                     |         |                      |         |                      |         | 1.111 (1.058; 1.167) |         | 1.102 (1.048; 1.158) |         |
|                                                 | 6                  | 32 262      |                     |         |                      |         |                      |         | 1.118 (1.066; 1.173) |         | 1.103 (1.051; 1.158) |         |
|                                                 | 7                  | 50 863      |                     |         |                      |         |                      |         | 1.14 (1.089; 1.194)  |         | 1.126 (1.075; 1.18)  |         |
|                                                 | 8                  | 6 2331      |                     |         |                      |         |                      |         | 1.143 (1.092; 1.195) |         | 1.126 (1.076; 1.179) |         |
|                                                 | 9                  | 64 131      |                     |         |                      |         |                      |         | 1.106 (1.057; 1.157) |         | 1.096 (1.047; 1.148) |         |
|                                                 | 10                 | 69 724      |                     |         |                      |         |                      |         | 1.081 (1.033; 1.132) |         | 1.081 (1.032; 1.132) |         |
| <b>Referring physician</b>                      | No <sup>3</sup>    | 20 032      |                     |         |                      |         |                      |         |                      |         | 1                    |         |
|                                                 | Yes                | 345 915     |                     |         |                      |         |                      |         |                      |         | 8.45 (7.946; 8.996)  |         |

<sup>3</sup> Reference category

1  
2  
3  
4  
5  
6  
7  
8  
9  
10  
11  
12  
13  
14  
15  
16  
17  
18  
19  
20  
21  
22  
23  
24  
25  
26  
27  
28  
29  
30  
31  
32  
33  
34  
35  
36  
37  
38  
39  
40  
41  
42  
43  
44  
45  
46

For peer review only

**Table 3: Pap smear uptake multivariable logistic regression models in recommended age group (Pap smear uptake = 28.81%)**

|                                        |                    | N             | Model 1<br>LogLik   | Model 2<br>LogLik    | Model 3<br>LogLik    | Model 4<br>LogLik    | Model 5<br>LogLik    |
|----------------------------------------|--------------------|---------------|---------------------|----------------------|----------------------|----------------------|----------------------|
|                                        |                    | Total= 711803 | OR (95%CI) -424737  | OR (95%CI) -420964   | OR (95%CI) -420368   | OR (95%CI) -420310   | OR (95%CI) -411557   |
| <b>Combined</b>                        | 1 <sup>4</sup>     | 4 741         | 1                   | 1                    | 1                    | 1                    | 1                    |
| <b>EDI and large urban/other areas</b> | 2                  | 9 906         | 0.945 (0.923,0.968) | 0.936 (0.914,0.959)  | 0.939 (0.917,0.962)  | 0.929 (0.907,0.952)  | 0.922 (0.899,0.945)  |
|                                        | 3                  | 16 889        | 0.918 (0.894,0.942) | 0.902 (0.879,0.927)  | 0.908 (0.884,0.932)  | 0.897 (0.873,0.921)  | 0.889 (0.865,0.913)  |
|                                        | 4                  | 21 643        | 0.887 (0.863,0.912) | 0.878 (0.854,0.902)  | 0.886 (0.862,0.91)   | 0.878 (0.854,0.903)  | 0.873 (0.849,0.898)  |
|                                        | 5                  | 20 561        | 0.833 (0.811,0.855) | 0.816 (0.795,0.838)  | 0.826 (0.804,0.848)  | 0.817 (0.795,0.839)  | 0.816 (0.794,0.839)  |
|                                        | 6                  | 31 816        | 0.793 (0.772,0.815) | 0.781 (0.76,0.803)   | 0.792 (0.771,0.814)  | 0.78 (0.759,0.802)   | 0.781 (0.759,0.803)  |
| EDI (deciles)                          | 7                  | 31 628        | 0.801 (0.78,0.823)  | 0.788 (0.766,0.81)   | 0.8 (0.778,0.822)    | 0.791 (0.769,0.813)  | 0.805 (0.782,0.828)  |
| in large urban area                    | 8                  | 32 394        | 0.806 (0.784,0.829) | 0.788 (0.766,0.81)   | 0.806 (0.783,0.828)  | 0.801 (0.778,0.824)  | 0.81 (0.787,0.834)   |
|                                        | 9                  | 33 163        | 0.735 (0.716,0.754) | 0.716 (0.698,0.735)  | 0.738 (0.719,0.758)  | 0.729 (0.709,0.749)  | 0.748 (0.727,0.769)  |
|                                        | 10                 | 26 469        | 0.616 (0.601,0.631) | 0.602 (0.588,0.618)  | 0.643 (0.627,0.659)  | 0.636 (0.619,0.653)  | 0.66 (0.642,0.679)   |
|                                        | 1                  | 57 497        | 0.723 (0.678,0.773) | 0.735 (0.688,0.785)  | 0.737 (0.69,0.787)   | 0.749 (0.701,0.801)  | 0.747 (0.699,0.799)  |
|                                        | 2                  | 61 046        | 0.703 (0.671,0.738) | 0.72 (0.686,0.755)   | 0.724 (0.69,0.759)   | 0.731 (0.697,0.767)  | 0.732 (0.697,0.768)  |
|                                        | 3                  | 43 874        | 0.685 (0.659,0.711) | 0.704 (0.677,0.731)  | 0.707 (0.681,0.735)  | 0.715 (0.688,0.744)  | 0.716 (0.689,0.745)  |
| EDI (deciles)                          | 4                  | 38929         | 0.667 (0.644,0.69)  | 0.684 (0.661,0.709)  | 0.69 (0.666,0.714)   | 0.693 (0.669,0.718)  | 0.693 (0.669,0.718)  |
| in other area                          | 5                  | 44470         | 0.628 (0.606,0.651) | 0.645 (0.623,0.669)  | 0.65 (0.627,0.674)   | 0.655 (0.631,0.679)  | 0.659 (0.635,0.683)  |
|                                        | 6                  | 41648         | 0.608 (0.59,0.627)  | 0.626 (0.607,0.645)  | 0.632 (0.613,0.652)  | 0.631 (0.611,0.651)  | 0.637 (0.617,0.657)  |
|                                        | 7                  | 40648         | 0.619 (0.6,0.638)   | 0.637 (0.618,0.657)  | 0.647 (0.628,0.668)  | 0.646 (0.626,0.666)  | 0.648 (0.628,0.669)  |
|                                        | 8                  | 38018         | 0.591 (0.574,0.61)  | 0.61 (0.591,0.629)   | 0.621 (0.602,0.641)  | 0.62 (0.601,0.64)    | 0.622 (0.603,0.642)  |
|                                        | 9                  | 49069         | 0.559 (0.542,0.577) | 0.573 (0.556,0.591)  | 0.588 (0.57,0.607)   | 0.582 (0.564,0.601)  | 0.59 (0.571,0.609)   |
|                                        | 10                 | 67394         | 0.524 (0.506,0.542) | 0.533 (0.516,0.552)  | 0.556 (0.537,0.575)  | 0.552 (0.533,0.572)  | 0.562 (0.542,0.582)  |
| <b>Age (y.o)</b>                       | 25-30 <sup>4</sup> | 82413         |                     | 1                    | 1                    | 1                    | 1                    |
|                                        | 30-35              | 88249         |                     | 1.084 (1.062; 1.106) | 1.08 (1.059; 1.103)  | 1.081 (1.059; 1.104) | 1.06 (1.038; 1.082)  |
|                                        | 35-40              | 85200         |                     | 1.063 (1.042; 1.085) | 1.056 (1.035; 1.078) | 1.057 (1.035; 1.079) | 1.021 (1; 1.043)     |
|                                        | 40-45              | 92964         |                     | 1.031 (1.01; 1.052)  | 1.021 (1; 1.042)     | 1.021 (1.001; 1.042) | 0.963 (0.944; 0.984) |
|                                        | 45-50              | 94291         |                     | 0.988 (0.968; 1.008) | 0.975 (0.955; 0.995) | 0.975 (0.956; 0.996) | 0.906 (0.888; 0.925) |
|                                        | 50-55              | 88241         |                     | 0.826 (0.809; 0.843) | 0.811 (0.794; 0.828) | 0.812 (0.795; 0.829) | 0.749 (0.733; 0.765) |
|                                        | 55-60              | 83126         |                     | 0.655 (0.64; 0.669)  | 0.641 (0.627; 0.655) | 0.641 (0.627; 0.656) | 0.587 (0.574; 0.601) |
|                                        | 60-65              | 81209         |                     | 0.573 (0.56; 0.586)  | 0.558 (0.545; 0.57)  | 0.558 (0.546; 0.571) | 0.507 (0.496; 0.519) |
|                                        | 65                 | 16110         |                     | 0.468 (0.448; 0.488) | 0.454 (0.434; 0.474) | 0.454 (0.435; 0.474) | 0.413 (0.395; 0.431) |
| <b>CMU-C</b>                           | No <sup>4</sup>    | 655969        |                     |                      | 1                    | 1                    | 1                    |
|                                        | Yes                | 55834         |                     |                      | 0.696 (0.681; 0.711) | 0.695 (0.681; 0.71)  | 0.669 (0.655; 0.684) |
| <b>GP PLA (deciles)</b>                | 1 <sup>4</sup>     | 18607         |                     |                      |                      | 1                    | 1                    |
|                                        | 2                  | 24385         |                     |                      |                      | 0.966 (0.925; 1.01)  | 0.951 (0.909; 0.994) |
|                                        | 3                  | 26121         |                     |                      |                      | 0.982 (0.941; 1.026) | 0.97 (0.928; 1.013)  |
|                                        | 4                  | 37307         |                     |                      |                      | 1.004 (0.965; 1.046) | 0.989 (0.95; 1.031)  |
|                                        | 5                  | 49815         |                     |                      |                      | 1.01 (0.971; 1.05)   | 0.991 (0.952; 1.03)  |
|                                        | 6                  | 63615         |                     |                      |                      | 1.033 (0.994; 1.073) | 1.017 (0.978; 1.056) |
|                                        | 7                  | 98949         |                     |                      |                      | 1.049 (1.011; 1.088) | 1.031 (0.993; 1.069) |
|                                        | 8                  | 123460        |                     |                      |                      | 1.086 (1.048; 1.126) | 1.068 (1.03; 1.108)  |
|                                        | 9                  | 127253        |                     |                      |                      | 1.056 (1.018; 1.095) | 1.046 (1.009; 1.086) |
|                                        | 10                 | 142291        |                     |                      |                      | 1.03 (0.993; 1.069)  | 1.049 (1.011; 1.088) |
| <b>Referring physician</b>             | No <sup>4</sup>    | 57596         |                     |                      |                      |                      | 1                    |
|                                        | Yes                | 654207        |                     |                      |                      |                      | 5.389 (5.227; 5.557) |

<sup>4</sup> Reference category

#### 4. Discussion

Our study highlighted a link between deprivation and gynaecological cancers screening uptake, in and outside the recommended age groups. This link follows a social gradient across all socioeconomic levels. The gradient was stronger in large urban areas. The successive inclusion of variables indicating financial precarity, healthcare accessibility, and adherence to the healthcare system decreased only very slightly the association, suggesting that these variables explain a very limited extent of the link between EDI and screening uptake. The social and territorial disparities in mammography uptake were lower in the recommended age group than outside.

The main strength of our study is its power and comprehensiveness, achieved by using health insurance data. Using both individual and contextual variables to investigate the link between an ecological deprivation index and screening uptake is original. Another original aspect is the exploration of screening uptake outside the recommended age groups and the observation of two different implementation modes for national recommendations (with and without a screening programme). Our study also has limitations. As our data covered only 1 year, we could not differentiate between women who had screening tests every year (more often than recommended) and the ones who had it every two and three years as recommended. It raises the question of excess screening and its link with SEP. The limited number of individual and contextual variables in our dataset restrained our capability to disentangle what could be explained by contextual and individual properties in the associations we observed with EDI. The same difficulty limited the exploration of financial, physical, and sociocultural accessibility mechanisms involved in the social gradient.

We complemented existing literature on social inequalities in access to mammography and pap smear. The link between deprivation and screening participation was found in numerous

1  
2  
3 countries all over the world, irrespective of the local healthcare policy. In the United States,  
4 where no centrally organised cancer screening programme exists, this link was repeatedly  
5 reported at an individual and at an area levels (22–24). In most Western European countries,  
6 nationally organised screening programmes are in place. The studies conducted there also  
7 showed an impact of SEP (25–27). In France, the lack of individual socioeconomic variable in  
8 healthcare datasets has made it difficult to obtain large and representative evidence. A few  
9 cohort studies have been conducted, but were limited by the relatively small sample size  
10 (7,28,29). Using healthcare insurance reimbursement data merged with sociodemographic  
11 information made it possible to assess the impact of socioterritorial inequalities in larger studies,  
12 more representative of the French population (30).

26  
27 Our study tried to identify some of the mechanisms involved in the link between deprivation  
28 and screening uptake. One of our hypotheses was that deprivation leads to limitations of the  
29 three dimensions of healthcare accessibility: financial, physical, and sociocultural. We used  
30 CMU-C to explore the effect of financial precarity in the link between deprivation and screening  
31 uptake and GP PLA, a proxy for healthcare supply, to reflect physical accessibility. Our result  
32 suggests that the association between deprivation and screening uptake is very slightly  
33 influenced by these variables. This could be due to the choice of variables used in our model.  
34 CMU-C may not be enough precise to measure financial accessibility. GP PLA is a good proxy  
35 for physical accessibility to primary care, but maybe not to specialty care. Regarding  
36 sociocultural accessibility, no truly relevant variable was available in our dataset. Our results  
37 showed that the overall adherence to the healthcare system, approached by having a referring  
38 physician, only modified slightly the link between EDI and screening uptake. However  
39 sociocultural accessibility covers several concepts. Using psychological models, R. Crockett  
40 explained that the most deprived people focus more on present time (31). They concentrate on  
41 the inconvenience of the screening rather than on the possible long-term benefits. A measure

1  
2  
3 of this mechanism, the fear of the result, language barriers or cultural representations (32) could  
4 be better proxies for sociocultural accessibility.  
5  
6

7  
8 However, our study suggests that having a referring physician has a substantial direct impact  
9 on pap smear and mammography uptake. This key role of primary care providers was observed  
10 in other countries, like the United States and Canada (33,34). The improvement in screening  
11 uptake in people with a referring physician could be due to the direct role of the physician in  
12 overcoming the barriers to screening. This result might also be explained by another  
13 phenomenon linked to healthcare access: the patient's understanding of and capacity to navigate  
14 the healthcare system.  
15  
16  
17  
18  
19  
20  
21  
22  
23

24  
25 We confirmed territorial disparities in screening access. Large urban areas had higher  
26 participation rates than the rest of the region. These rural/urban disparities were observed in  
27 several studies in Western Europe and North America (17–19,27,35,36). The social gradient  
28 also appeared generally stronger in large urban areas. This result corroborates the assumption  
29 that a social gradient exists only if the healthcare supply is sufficient.  
30  
31  
32  
33  
34  
35  
36

37 We observed that the social and territorial disparities in mammography uptake were lower  
38 inside than outside the recommended age groups. We did not observe the same trend for pap  
39 smear uptake. This difference could be explained by the nationally organised screening  
40 programme in place for breast cancer at the time of data collection but not for cervical cancer.  
41  
42 Some studies suggested that tools used in the breast cancer screening programme might help  
43 decrease inequalities of access (37,38), but other showed that a national programme, with the  
44 exact same actions for every women, while improving overall participation rates, could also  
45 increase the social gradient in uptake (39). Pap smear and mammography uptake also appeared  
46 very high in women younger than the recommended age. While the social gradient within the  
47 recommended age groups is likely to be explained by a low uptake in deprived populations, its  
48  
49  
50  
51  
52  
53  
54  
55  
56  
57  
58  
59  
60

1  
2  
3 existence among younger and older women may indicate an overuse of screening in high SEP  
4  
5 populations (40).  
6  
7

8 Developing global dataset combining health data and diverse socioeconomic data, at individual  
9  
10 and contextual levels, could enable a better understanding of the mechanisms involved in this  
11  
12 social gradient, and therefore the development of targeted territorial actions to improve equity  
13  
14 of access to healthcare.  
15  
16  
17  
18  
19  
20  
21  
22  
23  
24  
25  
26  
27  
28  
29  
30  
31  
32  
33  
34  
35  
36  
37  
38  
39  
40  
41  
42  
43  
44  
45  
46  
47  
48  
49  
50  
51  
52  
53  
54  
55  
56  
57  
58  
59  
60

For peer review only

1  
2  
3 Author contributions: LO: Conceptualisation, Methodology, Formal analysis, Funding  
4 acquisition, Writing – original draft and review & editing. CD: Conceptualisation,  
5 Methodology, Formal analysis, Supervision, Validation. PG: Conceptualisation, Data  
6 curation, Methodology, Formal analysis, Supervision, Validation. MERB: Conceptualisation,  
7 Funding acquisition, Validation. SL: Methodology, Formal analysis, Writing – review,  
8 Validation. VD: Writing – review, Validation.

9  
10  
11  
12  
13  
14  
15  
16  
17 All authors read, edited, and approved the final manuscript.

18  
19  
20  
21  
22  
23 Acknowledgments:

24  
25  
26 We gratefully acknowledge Sarah Ouanhnon for her translation help and her many advice.  
27  
28 Many thanks to Hervé Mainsonneuve for his careful reading and his precious advice. We wish  
29 to thank all the members of the research team: Marine Maurel for her skills with R-software,  
30  
31 Camille Joanes for her advice, and all the other members. The research team is supported by  
32  
33 the French association “La Ligue contre le cancer”.

34  
35  
36  
37  
38  
39  
40  
41 Data availability statements: This study is conformed to the principles embodied in the  
42 Declaration of Helsinki. The data we used in this study belongs to the French National Health  
43 Insurance. The procurement of such data necessitates the agreement of the French National  
44 Institute of Health Data (INDS) and the permission from the ‘Commission Nationale  
45 Informatique et Liberté’s’ (CNIL) which is the French Data Protection Authority in accordance  
46 with Law No 78/17 of 6 January 1978 on computing, files and personal information, article 54,  
47 paragraph I. Data cannot be diffused without these authorisations. A CNIL Authorisation (no.  
48 1634837) was obtained for our study. In addition, data cannot be shared with anyone who does  
49  
50  
51  
52  
53  
54  
55  
56  
57  
58  
59  
60



1  
2  
3 not have these authorisations. In our study, the Regional Health Agency of Occitanie completed  
4 the necessary formalities with the relevant authorities. If other authors want to obtain the data,  
5 they have to contact directly the French National Institute of Health Data and obtain the  
6 permission of the CNIL. It can be done on the INDS website (<http://www.indsante.fr/>). In  
7 addition, data regarding demographical characteristics of the whole inhabitants of the region  
8 can be freely obtained from the French national institute for statistics and economic studies  
9 (<https://www.insee.fr/fr/statistiques/>).

10  
11  
12  
13  
14  
15  
16  
17  
18  
19 Ethics statement: According to French registration, the ethics Committee approval is not  
20 applicable for this study (on pre-existing dataset).

21  
22  
23 This study is conformed to the principles embodied in the Declaration of Helsinki. The  
24 authors obtained an agreement of the French National Institute of Health Data (INDS) and the  
25 permission from the ‘Commission Nationale Informatique et Liberte’s’ (CNIL) which is the  
26 French Data Protection Authority in accordance with Law No 78/17 of 6 January 1978 on  
27 computing, files and personal information, article 54, paragraph I. CNIL Authorisation: no.  
28 1634837.

29  
30  
31  
32  
33  
34 Funding Statement: This work was supported by Toulouse Hospital (“allocation jeune  
35 chercheur de la DRCI”, Direction de la Recherche Clinique et de l’Innovation). There is no  
36 grant number: Toulouse Hospital allocates this grant to young doctors who wish to deepen  
37 their knowledge in research, after studying their research project.

38  
39  
40  
41  
42  
43  
44 Declaration of Competing Interest: The authors have declared that no competing interests  
45 exist.

## 46 47 48 49 50 References

- 51  
52 1. International Agency for research on Cancer. Estimated number of deaths in 2020, breast,  
53 females, all ages: IARC Gobocan [Internet]. Disponible sur: [https://gco.iarc.fr/today/online-analysis-table?v=2020&mode=population&mode\\_population=countries&population=900&populations=900&key=asr&sex=2&cancer=20&type=1&statistic=5&prevalence=0&population\\_group=0&ages\\_group%5B%5D=0&ages\\_group%5B%5D=17&group\\_cancer=1&include\\_nmsc=1&include\\_nmsc\\_other=1](https://gco.iarc.fr/today/online-analysis-table?v=2020&mode=population&mode_population=countries&population=900&populations=900&key=asr&sex=2&cancer=20&type=1&statistic=5&prevalence=0&population_group=0&ages_group%5B%5D=0&ages_group%5B%5D=17&group_cancer=1&include_nmsc=1&include_nmsc_other=1)

- 1  
2  
3 2. Institut National du Cancer. Le programme de dépistage organisé - Dépistage du cancer du sein  
4 [Internet]. cancer.fr. 2019. Disponible sur: [https://www.e-cancer.fr/Professionnels-de-](https://www.e-cancer.fr/Professionnels-de-sante/Depistage-et-detection-precoce/Depistage-du-cancer-du-sein/Le-programme-de-depistage-organise)  
5 [sante/Depistage-et-detection-precoce/Depistage-du-cancer-du-sein/Le-programme-de-](https://www.e-cancer.fr/Professionnels-de-sante/Depistage-et-detection-precoce/Depistage-du-cancer-du-sein/Le-programme-de-depistage-organise)  
6 [depistage-organise](https://www.e-cancer.fr/Professionnels-de-sante/Depistage-et-detection-precoce/Depistage-du-cancer-du-sein/Le-programme-de-depistage-organise)  
7
- 8  
9 3. INCA. Le programme de dépistage organisé du cancer du col de l'utérus - Dépistage du cancer  
10 du col de l'utérus [Internet]. Disponible sur: [https://www.e-cancer.fr/Professionnels-de-](https://www.e-cancer.fr/Professionnels-de-sante/Depistage-et-detection-precoce/Depistage-du-cancer-du-col-de-l-uterus/Le-programme-de-depistage-organise)  
11 [sante/Depistage-et-detection-precoce/Depistage-du-cancer-du-col-de-l-uterus/Le-programme-](https://www.e-cancer.fr/Professionnels-de-sante/Depistage-et-detection-precoce/Depistage-du-cancer-du-col-de-l-uterus/Le-programme-de-depistage-organise)  
12 [de-depistage-organise](https://www.e-cancer.fr/Professionnels-de-sante/Depistage-et-detection-precoce/Depistage-du-cancer-du-col-de-l-uterus/Le-programme-de-depistage-organise)  
13
- 14 4. Santé publique France. Evaluation du programme de dépistage du cancer du col de l'utérus  
15 [Internet]. [cité 13 mai 2020]. Disponible sur: [http://santepubliquefrance.fr/maladies-et-](http://santepubliquefrance.fr/maladies-et-traumatismes/cancers/cancer-du-col-de-l-uterus/articles/evaluation-du-programme-de-depistage-du-cancer-du-col-de-l-uterus)  
16 [traumatismes/cancers/cancer-du-col-de-l-uterus/articles/evaluation-du-programme-de-](http://santepubliquefrance.fr/maladies-et-traumatismes/cancers/cancer-du-col-de-l-uterus/articles/evaluation-du-programme-de-depistage-du-cancer-du-col-de-l-uterus)  
17 [depistage-du-cancer-du-col-de-l-uterus](http://santepubliquefrance.fr/maladies-et-traumatismes/cancers/cancer-du-col-de-l-uterus/articles/evaluation-du-programme-de-depistage-du-cancer-du-col-de-l-uterus)  
18
- 19 5. Poiseuil M, Coureau G, Payet C, Savès M, Debled M, Mathoulin-Pelissier S, et al. Deprivation  
20 and mass screening: Survival of women diagnosed with breast cancer in France from 2008 to  
21 2010. *Cancer Epidemiol.* 2019;60:149-55.  
22
- 23 6. Duport N, Serra D, Goulard H, Bloch J. Quels facteurs influencent la pratique du dépistage des  
24 cancers féminins en France ? *Revue d'Épidémiologie et de Santé Publique.* 1 oct  
25 2008;56(5):303-13.  
26
- 27 7. Grillo F, Vallée J, Chauvin P. Inequalities in cervical cancer screening for women with or without  
28 a regular consulting in primary care for gynaecological health, in Paris, France. *Prev Med.* avr  
29 2012;54(3-4):259-65.  
30
- 31 8. Delpierre C, Fantin R, Chehoud H, Nicoules V, Bayle A, Souche A, et al. Inégalités sociales  
32 d'accès aux soins et à la prévention en Midi-Pyrénées, France, 2012. 2016; Disponible sur:  
33 [http://invs.santepubliquefrance.fr//beh/2016/1/2016\\_1\\_1.html](http://invs.santepubliquefrance.fr//beh/2016/1/2016_1_1.html)  
34
- 35 9. Evans DB, Hsu J, Boerma T. Universal health coverage and universal access. *Bull World Health*  
36 *Organ.* août 2013;91:546-546A.  
37
- 38 10. Thiede M, Akweongo P, McIntyre D. Exploring the dimensions of access. In: McIntyre D,  
39 Mooney G, éditeurs. *The Economics of Health Equity* [Internet]. Cambridge: Cambridge  
40 University Press; 2007 [cité 8 juin 2020]. p. 103-23. Disponible sur:  
41 [https://www.cambridge.org/core/books/economics-of-health-equity/exploring-the-](https://www.cambridge.org/core/books/economics-of-health-equity/exploring-the-dimensions-of-access/684DFDF7B640370D207C59FEAFC967E7)  
42 [dimensions-of-access/684DFDF7B640370D207C59FEAFC967E7](https://www.cambridge.org/core/books/economics-of-health-equity/exploring-the-dimensions-of-access/684DFDF7B640370D207C59FEAFC967E7)  
43
- 44 11. HCSP. Les systèmes d'information pour la santé publique [Internet]. Paris: Haut Conseil de la  
45 Santé Publique; 2009 nov [cité 10 mars 2019]. Disponible sur:  
46 <https://www.hcsp.fr/explore.cgi/avisrapportsdomaine?clefr=175>  
47
- 48 12. Ducros D, Nicoules V, Chehoud H, Bayle A, Souche A, Tanguy M, et al. Les bases médico-  
49 administratives pour mesurer les inégalités sociales de santé. *Sante Publique.* 24 août 2015;Vol.  
50 27(3):383-94.  
51
- 52 13. Pornet C, Delpierre C, Dejardin O, Grosclaude P, Launay L, Guittet L, et al. Construction of an  
53 adaptable European transnational ecological deprivation index: the French version. *J Epidemiol*  
54 *Community Health.* nov 2012;66(11):982-9.  
55  
56  
57  
58  
59  
60

14. Yang XY, Hu A, Schieman S. Relative deprivation in context: How contextual status homogeneity shapes the relationship between disadvantaged social status and health. *Social Science Research*. 1 juill 2019;81:157-69.
15. Muriel Barlet, Magali Coldefy, Clémentine Collin, Véronique Lucas-Gabrielli. L'Accessibilité potentielle localisée (APL) : une nouvelle mesure de l'accessibilité aux soins appliquée aux médecins généralistes libéraux en France [Internet]. Drees; 2012. Disponible sur: <https://drees.solidarites-sante.gouv.fr/etudes-et-statistiques/publications/documents-de-travail/serie-etudes-et-recherche/article/l-accessibilite-potentielle-localisee-apl-une-nouvelle-mesure-de-l>
16. Short SE, Mollborn S. Social Determinants and Health Behaviors: Conceptual Frames and Empirical Advances. *Curr Opin Psychol*. oct 2015;5:78-84.
17. Chandak A, Nayar P, Lin G. Rural-Urban Disparities in Access to Breast Cancer Screening: A Spatial Clustering Analysis. *J Rural Health*. 2019;35(2):229-35.
18. Orwat J, Caputo N, Key W, De Sa J. Comparing Rural and Urban Cervical and Breast Cancer Screening Rates in a Privately Insured Population. *Soc Work Public Health*. 2017;32(5):311-23.
19. Leung J, McKenzie S, Martin J, McLaughlin D. Effect of rurality on screening for breast cancer: a systematic review and meta-analysis comparing mammography. *Rural Remote Health*. 2014;14(2):2730.
20. R Core Team. R: A language and environment for statistical computing. [Internet]. 2013. Disponible sur: <http://www.R-project.org/>
21. Smith RA, Andrews KS, Brooks D, Fedewa SA, Manassaram-Baptiste D, Saslow D, et al. Cancer screening in the United States, 2019: A review of current American Cancer Society guidelines and current issues in cancer screening. *CA: A Cancer Journal for Clinicians*. 2019;69(3):184-210.
22. Dailey AB, Kasl SV, Holford TR, Calvocoressi L, Jones BA. Neighborhood-Level Socioeconomic Predictors of Nonadherence to Mammography Screening Guidelines. *Cancer Epidemiol Biomarkers Prev*. 1 nov 2007;16(11):2293-303.
23. Dailey AB, Brumback BA, Livingston MD, Jones BA, Curbow BA, Xu X. Area-Level Socioeconomic Position and Repeat Mammography Screening Use: Results from the 2005 National Health Interview Survey. *Cancer Epidemiol Biomarkers Prev*. 1 nov 2011;20(11):2331-44.
24. Murfin J, Irvine F, Meechan-Rogers R, Swift A. Education, income and occupation and their influence on the uptake of cervical cancer prevention strategies: A systematic review. *J Clin Nurs*. févr 2020;29(3-4):393-415.
25. Borràs JM, Guillen M, Sanchez V, Juncà S, Vicente R. Educational level, voluntary private health insurance and opportunistic cancer screening among women in Catalonia (Spain): *European Journal of Cancer Prevention*. oct 1999;8(5):427-34.
26. Douglas E, Waller J, Duffy SW, Wardle J. Socioeconomic inequalities in breast and cervical screening coverage in England: are we closing the gap? *J Med Screen*. 2016;23(2):98-103.

- 1
- 2
- 3 27. Massat NJ, Douglas E, Waller J, Wardle J, Duffy SW. Variation in cervical and breast cancer
- 4 screening coverage in England: a cross-sectional analysis to characterise districts with atypical
- 5 behaviour. *BMJ Open*. 24 juill 2015;5(7):e007735.
- 6
- 7 28. Eisinger F, Viguier J, Touboul C, Coscas Y, Pivot X, Blay J-Y, et al. Social stratification, risk factor
- 8 prevalence and cancer screening attendance. *Eur J Cancer Prev*. juin 2015;24 Suppl:S77-81.
- 9
- 10 29. Chauvin P, Parizot I. Les inégalités sociales et territoriales de santé dans l'agglomération
- 11 parisienne. Une analyse de la cohorte Sirs (2005) [Internet]. Délégation interministérielle à la
- 12 Ville; 2009 [cité 1 juin 2020]. Disponible sur: <https://www.hal.inserm.fr/inserm-00415971>
- 13
- 14 30. Deborde T, Chatignoux E, Quintin C, Beltzer N, Hamers FF, Rogel A. Breast cancer screening
- 15 programme participation and socioeconomic deprivation in France. *Prev Med*. 2018;115:53-60.
- 16
- 17 31. Crockett R, Wilkinson TM, Marteau TM. Social patterning of screening uptake and the impact of
- 18 facilitating informed choices: psychological and ethical analyses. *Health Care Anal*. mars
- 19 2008;16(1):17-30.
- 20
- 21 32. Szarewski A, Cadman L, Ashdown-Barr L, Waller J. Exploring the acceptability of two self-
- 22 sampling devices for human papillomavirus testing in the cervical screening context: a
- 23 qualitative study of Muslim women in London. *J Med Screen*. 2009;16(4):193-8.
- 24
- 25 33. Schueler KM, Chu PW, Smith-Bindman R. Factors Associated with Mammography Utilization: A
- 26 Systematic Quantitative Review of the Literature. *Journal of Women's Health*. 27 oct
- 27 2008;17(9):1477-98.
- 28
- 29 34. Beaulieu MD, Béland F, Roy D, Falardeau M, Hébert G. Factors determining compliance with
- 30 screening mammography. *CMAJ*. 1 mai 1996;154(9):1335-43.
- 31
- 32 35. Ouédraogo S, Dabakuyo-Yonli TS, Roussot A, Dialla PO, Pornet C, Poillot M-L, et al. [Breast
- 33 cancer screening in thirteen French departments]. *Bull Cancer*. févr 2015;102(2):126-38.
- 34
- 35 36. Ouédraogo S, Dabakuyo-Yonli TS, Roussot A, Pornet C, Sarlin N, Lunaud P, et al. European
- 36 transnational ecological deprivation index and participation in population-based breast cancer
- 37 screening programmes in France. *Prev Med*. juin 2014;63:103-8.
- 38
- 39 37. Cancer Care Ontario. Cancer Fact: Invitation letters improve breast screening behaviour
- 40 [Internet]. 2016 [cité 13 mai 2020]. Disponible sur:
- 41 [https://www.cancercareontario.ca/en/cancer-facts/invitation-letters-improve-breast-](https://www.cancercareontario.ca/en/cancer-facts/invitation-letters-improve-breast-screening-behaviour)
- 42 [screening-behaviour](https://www.cancercareontario.ca/en/cancer-facts/invitation-letters-improve-breast-screening-behaviour)
- 43
- 44 38. Everett T, Bryant A, Griffin MF, Martin-Hirsch PP, Forbes CA, Jepson RG. Interventions targeted
- 45 at women to encourage the uptake of cervical screening. *Cochrane Database of Systematic*
- 46 *Reviews* [Internet]. 2011 [cité 16 oct 2019];(5). Disponible sur:
- 47 <https://www.cochranelibrary.com/cdsr/doi/10.1002/14651858.CD002834.pub2/full>
- 48
- 49 39. Raginel T, de Mil R, Garnier A, Launoy G, Guittet L. National organization of uterine cervical
- 50 cancer screening and social inequality in France. *European Journal of Cancer Prevention*
- 51 [Internet]. 10 déc 2019 [cité 1 juin 2020]; Publish Ahead of Print. Disponible sur:
- 52 [https://journals.lww.com/eurjcancerprev/Abstract/9000/National\\_organization\\_of\\_uterine\\_ce](https://journals.lww.com/eurjcancerprev/Abstract/9000/National_organization_of_uterine_cervical_cancer.99158.aspx)
- 53 [rvical\\_cancer.99158.aspx](https://journals.lww.com/eurjcancerprev/Abstract/9000/National_organization_of_uterine_cervical_cancer.99158.aspx)
- 54
- 55
- 56
- 57
- 58
- 59
- 60

- 1
- 2
- 3 40. Autier P. [Screening for breast cancer: worries about its effectiveness]. Rev Prat. déc
- 4 2013;63(10):1369-77.
- 5
- 6
- 7
- 8
- 9
- 10
- 11
- 12
- 13
- 14
- 15
- 16
- 17
- 18
- 19
- 20
- 21
- 22
- 23
- 24
- 25
- 26
- 27
- 28
- 29
- 30
- 31
- 32
- 33
- 34
- 35
- 36
- 37
- 38
- 39
- 40
- 41
- 42
- 43
- 44
- 45
- 46
- 47
- 48
- 49
- 50
- 51
- 52
- 53
- 54
- 55
- 56
- 57
- 58
- 59
- 60

For peer review only

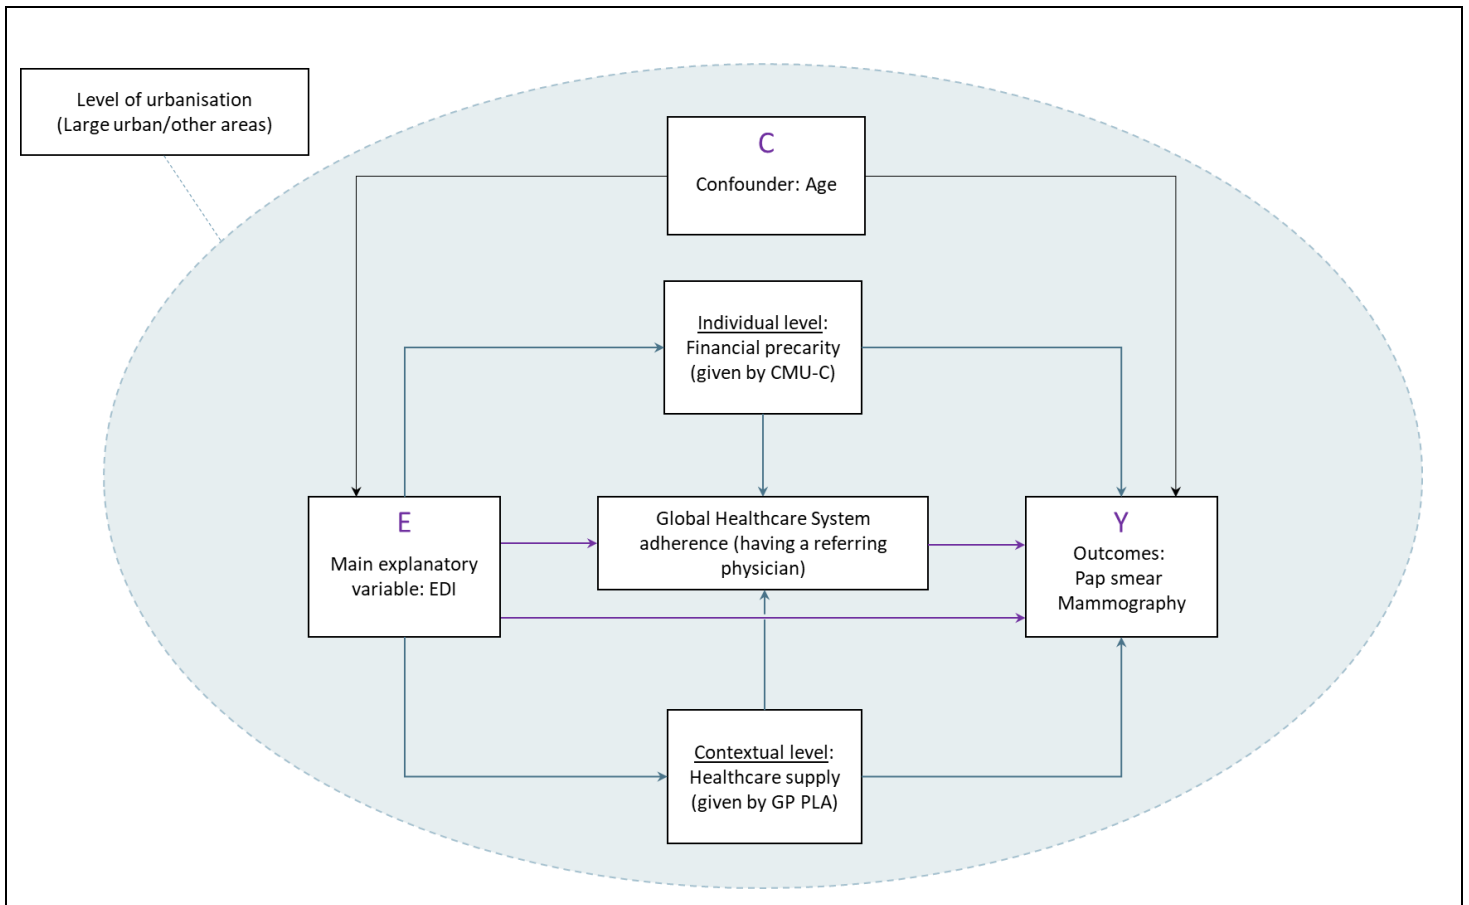

**Figure 1: Conceptual model**  
 Links between the studied variables assumed to explain the impact of deprivation on screening uptake, depending on the level of urbanisation.

view only

**Figure 2: Mammography and pap smear uptake and combined variable EDI in large urban/other areas by age group, Midi Pyrenees region, 2012.**  
 Results from a logistic model adjusted for EDI by age, CMU-C, GP PLA, having an official referring physician.  
 Data from models 5 (Table 2 and 3) for the recommended age groups.

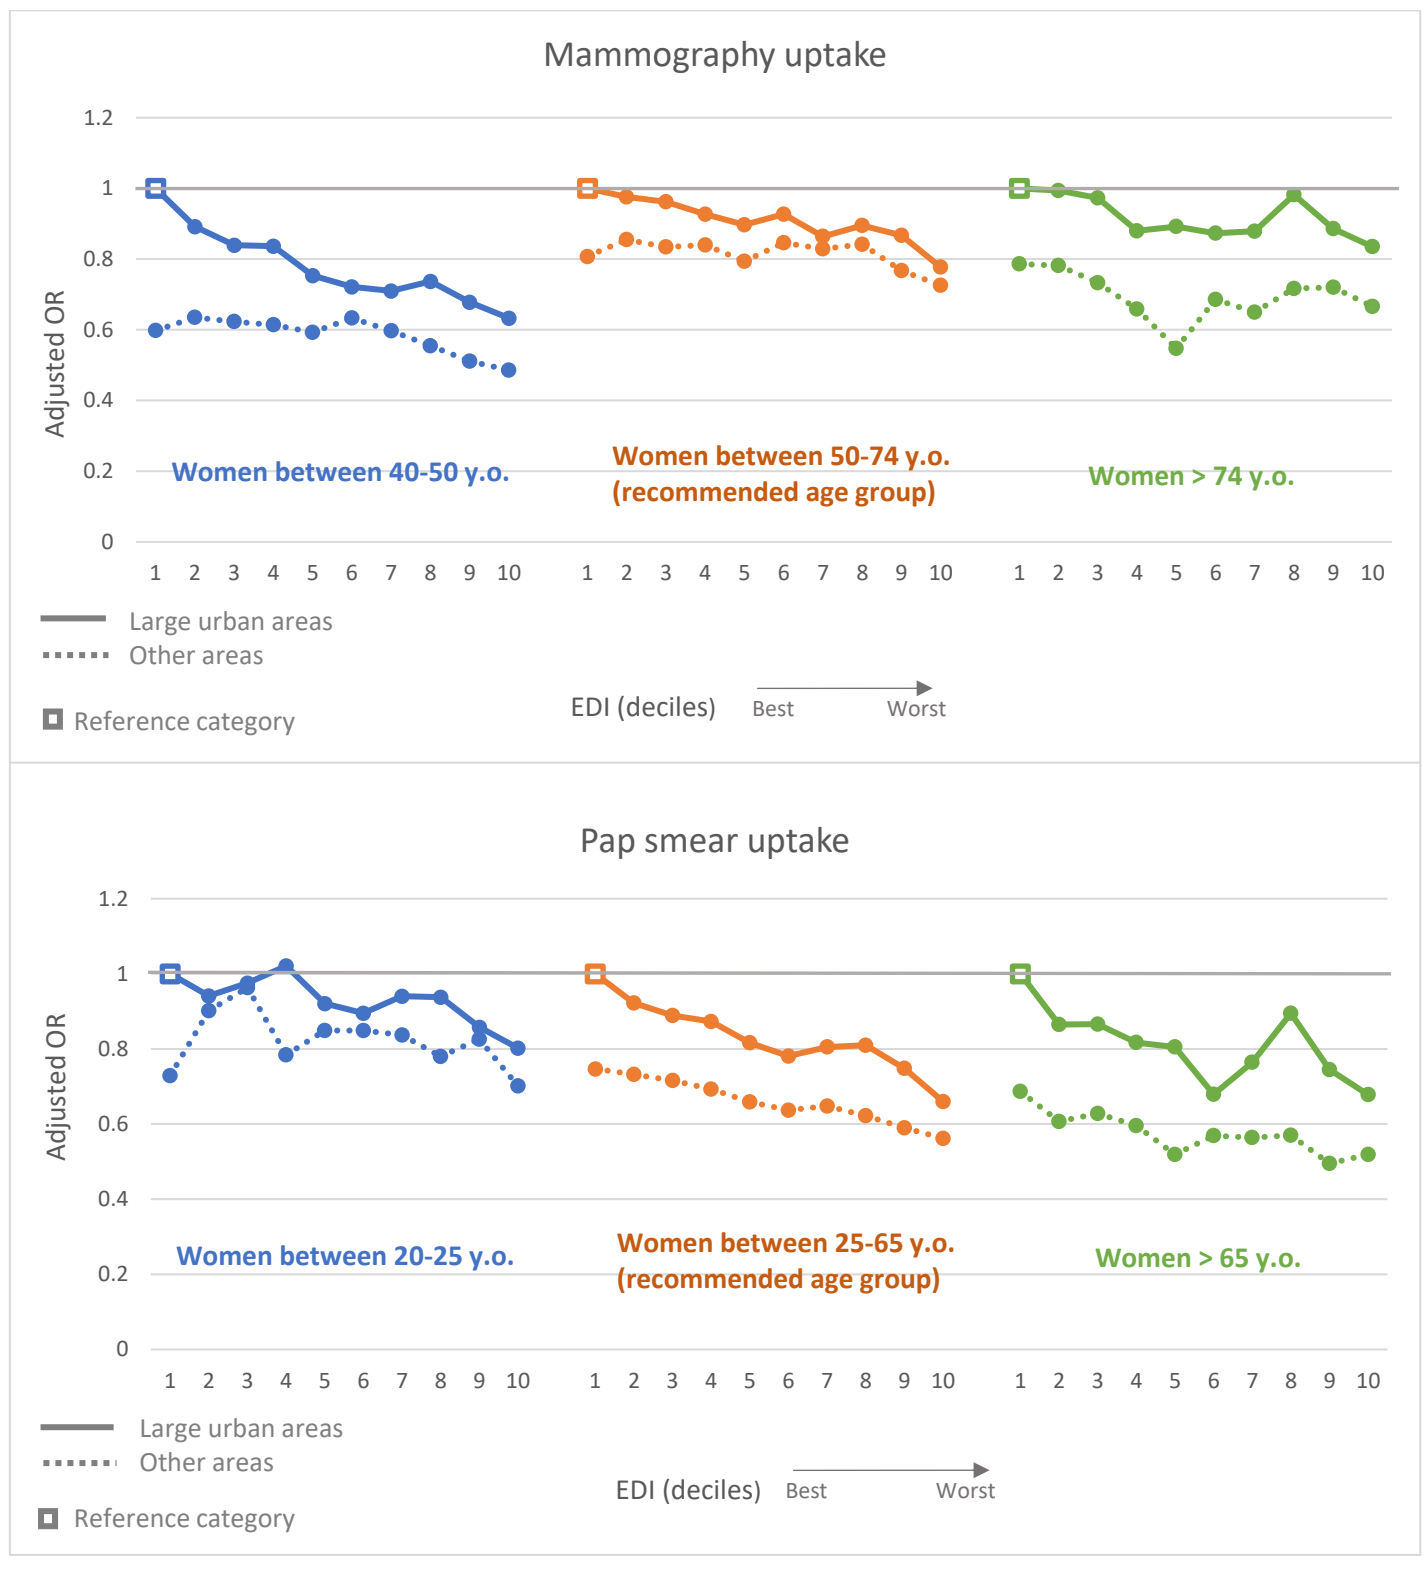

1  
2  
3  
4  
5  
6  
7  
8  
9  
10  
11  
12  
13  
14  
15  
16  
17  
18  
19  
20  
21  
22  
23  
24  
25  
26  
27  
28  
29  
30  
31  
32  
33  
34  
35  
36  
37  
38  
39  
40  
41  
42  
43  
44  
45  
46  
47  
48  
49  
50  
51  
52  
53  
54  
55  
56  
57  
58  
59  
60

For peer review only



## Supplementary material

### *Tables A: Characteristics of women in recommended age groups for gynaecological screening programmes in Midi Pyrénées*

#### Characteristics of women between 50 and 74 y.o. (recommended age group for mammography) N= 365 947

|                                   | Toulouse Metropolis | Other large urban area | Other area         |
|-----------------------------------|---------------------|------------------------|--------------------|
|                                   | n= 72919 (19.93%)   | n= 150755 (41.2%)      | n= 142273 (38.88%) |
|                                   | n (%)               | n (%)                  | n (%)              |
| <b>Mammography</b>                |                     |                        |                    |
| No Mammography                    | 49978 (68.54)       | 102663 (68.1)          | 100713 (70.79)     |
| ≥ 1 in the year                   | 22941 (31.46)       | 48092 (31.9)           | 41560 (29.21)      |
| <b>Age</b>                        |                     |                        |                    |
| Mean (SD)                         | 60.7 (6.8)          | 60.9 (6.9)             | 61.6 (6.9)         |
| <b>Age (/5years)</b>              |                     |                        |                    |
| 50-55 y.o                         | 19112 (26.21)       | 37568 (24.92)          | 31561 (22.18)      |
| 55-60 y.o                         | 17097 (23.45)       | 34985 (23.21)          | 31044 (21.82)      |
| 60-65 y.o                         | 15774 (21.63)       | 33460 (22.19)          | 31975 (22.47)      |
| 65-70 y.o,                        | 12305 (16.87)       | 25825 (17.13)          | 26664 (18.74)      |
| 70-75 y.o                         | 8631 (11.84)        | 18917 (12.55)          | 21029 (14.78)      |
| <b>EDI (deciles: 1=best)</b>      |                     |                        |                    |
| 1                                 | 7886 (10.81)        | 20596 (13.66)          | 2719 (1.91)        |
| 2                                 | 8615 (11.81)        | 20315 (13.48)          | 5896 (4.14)        |
| 3                                 | 4436 (6.08)         | 15563 (10.32)          | 10112 (7.11)       |
| 4                                 | 3484 (4.78)         | 14848 (9.85)           | 13232 (9.3)        |
| 5                                 | 8183 (11.22)        | 11820 (7.84)           | 12730 (8.95)       |
| 6                                 | 3368 (4.62)         | 16244 (10.78)          | 19906 (13.99)      |
| 7                                 | 6678 (9.16)         | 12055 (8)              | 20092 (14.12)      |
| 8                                 | 6367 (8.73)         | 10760 (7.14)           | 20741 (14.58)      |
| 9                                 | 9519 (13.05)        | 12192 (8.09)           | 20679 (14.53)      |
| 10                                | 14383 (19.72)       | 16362 (10.85)          | 16166 (11.36)      |
| <b>CMU-C</b>                      |                     |                        |                    |
| No CMU-C                          | 68850 (94.42)       | 145641 (96.61)         | 137381 (96.56)     |
| CMU-C                             | 4069 (5.58)         | 5114 (3.39)            | 4892 (3.44)        |
| <b>GP PLA (deciles: 10= best)</b> |                     |                        |                    |
| 1                                 | 363 (0.5)           | 1744 (1.16)            | 9320 (6.55)        |
| 2                                 | 922 (1.26)          | 4887 (3.24)            | 7958 (5.59)        |
| 3                                 | 0 (0)               | 6290 (4.17)            | 8165 (5.74)        |
| 4                                 | 803 (1.1)           | 9625 (6.38)            | 10154 (7.14)       |
| 5                                 | 1409 (1.93)         | 14229 (9.44)           | 10767 (7.57)       |
| 6                                 | 2695 (3.7)          | 17381 (11.53)          | 12186 (8.57)       |
| 7                                 | 9531 (13.07)        | 25353 (16.82)          | 15979 (11.23)      |
| 8                                 | 14772 (20.26)       | 25147 (16.68)          | 22412 (15.75)      |
| 9                                 | 15456 (21.2)        | 27726 (18.39)          | 20949 (14.72)      |
| 10                                | 26968 (36.98)       | 18373 (12.19)          | 24383 (17.14)      |
| <b>Referring physician</b>        |                     |                        |                    |
| No designated referring physician | 4898 (6.72)         | 7428 (4.93)            | 7706 (5.42)        |
| Official referring physician      | 68021 (93.28)       | 143327 (95.07)         | 134567 (94.58)     |

## Characteristics of women between 25 and 65 y.o. (recommended age group for pap smear)

N= 711 803

|                                   | Toulouse Metropolis         | Other large urban areas     | Other areas                |
|-----------------------------------|-----------------------------|-----------------------------|----------------------------|
|                                   | n= 180030 (25.59%)<br>n (%) | n= 302563 (42.61%)<br>n (%) | n= 229210 (32.2%)<br>n (%) |
| <b>Pap smear</b>                  |                             |                             |                            |
| No Pap smear                      | 123038 (68.34)              | 211072 (69.76)              | 172621 (75.31)             |
| ≥ 1 in the year                   | 56992 (31.66)               | 91491 (30.24)               | 56589 (24.69)              |
| <b>Age</b>                        |                             |                             |                            |
| Mean (SD)                         | 42.9 (11.8)                 | 45.5 (11.4)                 | 47.2 (11.4)                |
| <b>Age (/5years)</b>              |                             |                             |                            |
|                                   | n= 180030                   | n= 302563                   | n= 229210                  |
| 25-30 y.o                         | 30798 (17.11)               | 32111 (10.61)               | 19504 (8.51)               |
| 30-35 y.o                         | 28146 (15.63)               | 36721 (12.14)               | 23382 (10.2)               |
| 35-40 y.o                         | 23292 (12.94)               | 37351 (12.34)               | 24557 (10.71)              |
| 40-45 y.o                         | 21537 (11.96)               | 41983 (13.88)               | 29444 (12.85)              |
| 45-50 y.o                         | 21259 (11.81)               | 41829 (13.82)               | 31203 (13.61)              |
| 50-55 y.o                         | 19112 (10.62)               | 37568 (12.42)               | 31561 (13.77)              |
| 55-60 y.o                         | 17097 (9.5)                 | 34985 (11.56)               | 31044 (13.54)              |
| 60-65 y.o                         | 15774 (8.76)                | 33460 (11.06)               | 31975 (13.95)              |
| 65-70 y.o,                        | 3015 (1.67)                 | 6555 (2.17)                 | 6540 (2.85)                |
| <b>EDI (deciles: 1=best)</b>      |                             |                             |                            |
| 1                                 | 14747 (8.19)                | 42750 (14.13)               | 4741 (2.07)                |
| 2                                 | 19389 (10.77)               | 41657 (13.77)               | 9906 (4.32)                |
| 3                                 | 10922 (6.07)                | 32952 (10.89)               | 16889 (7.37)               |
| 4                                 | 8239 (4.58)                 | 30690 (10.14)               | 21643 (9.44)               |
| 5                                 | 21020 (11.68)               | 23450 (7.75)                | 20561 (8.97)               |
| 6                                 | 9173 (5.1)                  | 32475 (10.73)               | 31816 (13.88)              |
| 7                                 | 17062 (9.48)                | 23586 (7.8)                 | 31628 (13.8)               |
| 8                                 | 17051 (9.47)                | 20967 (6.93)                | 32394 (14.13)              |
| 9                                 | 26337 (14.63)               | 22732 (7.51)                | 33163 (14.47)              |
| 10                                | 36090 (20.05)               | 31304 (10.35)               | 26469 (11.55)              |
| <b>CMU-C</b>                      |                             |                             |                            |
| No CMU-C                          | 161075 (89.47)              | 281794 (93.14)              | 213100 (92.97)             |
| CMU-C                             | 18955 (10.53)               | 20769 (6.86)                | 16110 (7.03)               |
| <b>GP PLA (deciles: 10= best)</b> |                             |                             |                            |
| 1                                 | 831 (0.46)                  | 3162 (1.05)                 | 14614 (6.38)               |
| 2                                 | 2273 (1.26)                 | 9407 (3.11)                 | 12705 (5.54)               |
| 3                                 | 0 (0%)                      | 12683 (4.19)                | 13438 (5.86)               |
| 4                                 | 1815 (1.01)                 | 18903 (6.25)                | 16589 (7.24)               |
| 5                                 | 3312 (1.84)                 | 28690 (9.48)                | 17813 (7.77)               |
| 6                                 | 6666 (3.7)                  | 36519 (12.07)               | 20430 (8.91)               |
| 7                                 | 20097 (11.16)               | 52821 (17.46)               | 26031 (11.36)              |
| 8                                 | 37194 (20.66)               | 51056 (16.87)               | 35210 (15.36)              |
| 9                                 | 38815 (21.56)               | 54907 (18.15)               | 33531 (14.63)              |
| 10                                | 69027 (38.34)               | 34415 (11.37)               | 38849 (16.95)              |
| <b>Referring physician</b>        |                             |                             |                            |
| No designated                     | 18754 (10.42)               | 20659 (6.83)                | 18183 (7.93)               |
| Designated                        | 161276 (89.58)              | 281904 (93.17)              | 211027 (92.07)             |

*Tables B: Screening uptake multivariable logistic regression models outside the recommended age groups (sequential adjustment)*

| Mammography uptake multivariable logistic regression models (n= 187255): in 40-50 y.o. women (Mammography uptake = 20.77%) |                                           |                         |             |                     |        |                      |        |                      |        |                      |        |                      |        |
|----------------------------------------------------------------------------------------------------------------------------|-------------------------------------------|-------------------------|-------------|---------------------|--------|----------------------|--------|----------------------|--------|----------------------|--------|----------------------|--------|
|                                                                                                                            |                                           |                         | N           | Model 1             | LogLik | Model 2              | LogLik | Model 3              | LogLik | Model 4              | LogLik | Model 5              | LogLik |
|                                                                                                                            |                                           |                         | Tot= 187255 | OR (95%CI)          | -94934 | OR (95%CI)           | -94709 | OR (95%CI)           | -94508 | OR (95%CI)           | -94463 | OR (95%CI)           | -92837 |
| <b>Combined EDI and large urban/other</b>                                                                                  | <b>EDI (deciles) in large urban areas</b> | 1 <sup>1</sup>          | 1284        | 1                   |        | 1                    |        | 1                    |        | 1                    |        | 1                    |        |
|                                                                                                                            |                                           | 2                       | 2737        | 0.899 (0.857,0.944) |        | 0.901 (0.859,0.946)  |        | 0.906 (0.863,0.951)  |        | 0.897 (0.855,0.942)  |        | 0.892 (0.849,0.937)  |        |
|                                                                                                                            |                                           | 3                       | 4550        | 0.845 (0.801,0.892) |        | 0.847 (0.803,0.894)  |        | 0.855 (0.811,0.902)  |        | 0.843 (0.798,0.89)   |        | 0.839 (0.794,0.886)  |        |
|                                                                                                                            |                                           | 4                       | 5726        | 0.836 (0.791,0.884) |        | 0.84 (0.794,0.888)   |        | 0.851 (0.805,0.9)    |        | 0.84 (0.794,0.888)   |        | 0.837 (0.791,0.885)  |        |
|                                                                                                                            |                                           | 5                       | 5472        | 0.745 (0.705,0.788) |        | 0.748 (0.708,0.791)  |        | 0.761 (0.72,0.805)   |        | 0.751 (0.71,0.795)   |        | 0.753 (0.711,0.797)  |        |
|                                                                                                                            |                                           | 6                       | 8525        | 0.722 (0.682,0.764) |        | 0.722 (0.682,0.765)  |        | 0.737 (0.696,0.78)   |        | 0.722 (0.682,0.766)  |        | 0.722 (0.681,0.766)  |        |
|                                                                                                                            |                                           | 7                       | 8283        | 0.688 (0.649,0.73)  |        | 0.69 (0.65,0.731)    |        | 0.705 (0.665,0.748)  |        | 0.699 (0.658,0.742)  |        | 0.71 (0.668,0.754)   |        |
|                                                                                                                            |                                           | 8                       | 8564        | 0.706 (0.665,0.75)  |        | 0.709 (0.668,0.753)  |        | 0.732 (0.689,0.777)  |        | 0.731 (0.687,0.778)  |        | 0.737 (0.693,0.784)  |        |
|                                                                                                                            |                                           | 9                       | 8629        | 0.639 (0.603,0.677) |        | 0.64 (0.604,0.678)   |        | 0.67 (0.632,0.71)    |        | 0.665 (0.625,0.707)  |        | 0.678 (0.638,0.721)  |        |
|                                                                                                                            |                                           | 10                      | 6877        | 0.557 (0.528,0.587) |        | 0.557 (0.528,0.587)  |        | 0.61 (0.578,0.644)   |        | 0.61 (0.575,0.647)   |        | 0.633 (0.596,0.671)  |        |
|                                                                                                                            | <b>EDI (deciles) in other areas</b>       | 1                       | 16751       | 0.57 (0.492,0.66)   |        | 0.569 (0.491,0.66)   |        | 0.572 (0.494,0.663)  |        | 0.599 (0.516,0.694)  |        | 0.598 (0.515,0.694)  |        |
|                                                                                                                            |                                           | 2                       | 17342       | 0.616 (0.557,0.682) |        | 0.615 (0.555,0.681)  |        | 0.619 (0.559,0.686)  |        | 0.634 (0.572,0.702)  |        | 0.635 (0.573,0.704)  |        |
|                                                                                                                            |                                           | 3                       | 12299       | 0.593 (0.546,0.644) |        | 0.592 (0.545,0.643)  |        | 0.597 (0.549,0.648)  |        | 0.62 (0.571,0.674)   |        | 0.623 (0.573,0.678)  |        |
|                                                                                                                            |                                           | 4                       | 10802       | 0.596 (0.553,0.642) |        | 0.595 (0.552,0.641)  |        | 0.602 (0.558,0.649)  |        | 0.613 (0.568,0.661)  |        | 0.614 (0.569,0.663)  |        |
|                                                                                                                            |                                           | 5                       | 11523       | 0.57 (0.528,0.616)  |        | 0.568 (0.526,0.614)  |        | 0.574 (0.531,0.62)   |        | 0.587 (0.543,0.635)  |        | 0.593 (0.548,0.641)  |        |
|                                                                                                                            |                                           | 6                       | 10898       | 0.613 (0.575,0.654) |        | 0.612 (0.574,0.652)  |        | 0.621 (0.582,0.662)  |        | 0.624 (0.585,0.666)  |        | 0.633 (0.593,0.676)  |        |
|                                                                                                                            |                                           | 7                       | 10252       | 0.577 (0.54,0.616)  |        | 0.574 (0.538,0.613)  |        | 0.587 (0.55,0.627)   |        | 0.592 (0.554,0.633)  |        | 0.597 (0.558,0.638)  |        |
|                                                                                                                            |                                           | 8                       | 9432        | 0.53 (0.496,0.566)  |        | 0.528 (0.494,0.564)  |        | 0.543 (0.508,0.581)  |        | 0.55 (0.514,0.588)   |        | 0.555 (0.519,0.594)  |        |
|                                                                                                                            |                                           | 9                       | 11333       | 0.491 (0.459,0.525) |        | 0.49 (0.458,0.524)   |        | 0.507 (0.474,0.543)  |        | 0.505 (0.471,0.541)  |        | 0.511 (0.477,0.548)  |        |
|                                                                                                                            |                                           | 10                      | 15976       | 0.452 (0.419,0.487) |        | 0.45 (0.418,0.485)   |        | 0.476 (0.442,0.513)  |        | 0.479 (0.443,0.517)  |        | 0.486 (0.449,0.525)  |        |
| <b>Age</b>                                                                                                                 |                                           | 40-45 y.o. <sup>1</sup> | 92964       |                     |        | 1                    |        | 1                    |        | 1                    |        | 1                    |        |
|                                                                                                                            |                                           | 45-50 y.o.              | 94291       |                     |        | 1.275 (1.247; 1.305) |        | 1.27 (1.242; 1.299)  |        | 1.271 (1.242; 1.3)   |        | 1.258 (1.229; 1.286) |        |
| <b>CMU-C</b>                                                                                                               |                                           | No <sup>1</sup>         | 172456      |                     |        |                      |        | 1                    |        | 1                    |        | 1                    |        |
|                                                                                                                            |                                           | Yes                     | 14799       |                     |        |                      |        | 0.614 (0.584; 0.645) |        | 0.613 (0.583; 0.645) |        | 0.597 (0.567; 0.627) |        |
| <b>GP PLA (deciles)</b>                                                                                                    |                                           | 1 <sup>1</sup>          | 4959        |                     |        |                      |        |                      |        | 1                    |        | 1                    |        |
|                                                                                                                            |                                           | 2                       | 6486        |                     |        |                      |        |                      |        | 1.091 (0.99; 1.204)  |        | 1.078 (0.978; 1.19)  |        |
|                                                                                                                            |                                           | 3                       | 7123        |                     |        |                      |        |                      |        | 1.064 (0.967; 1.172) |        | 1.067 (0.969; 1.175) |        |
|                                                                                                                            |                                           | 4                       | 10062       |                     |        |                      |        |                      |        | 1.057 (0.966; 1.157) |        | 1.044 (0.954; 1.144) |        |
|                                                                                                                            |                                           | 5                       | 14074       |                     |        |                      |        |                      |        | 1.159 (1.063; 1.264) |        | 1.145 (1.05; 1.249)  |        |
|                                                                                                                            |                                           | 6                       | 17792       |                     |        |                      |        |                      |        | 1.173 (1.078; 1.276) |        | 1.158 (1.064; 1.261) |        |
|                                                                                                                            |                                           | 7                       | 27034       |                     |        |                      |        |                      |        | 1.217 (1.122; 1.321) |        | 1.201 (1.107; 1.305) |        |
|                                                                                                                            |                                           | 8                       | 33101       |                     |        |                      |        |                      |        | 1.262 (1.165; 1.369) |        | 1.247 (1.151; 1.354) |        |
| <b>Referring physician</b>                                                                                                 |                                           | No <sup>1</sup>         | 13378       |                     |        |                      |        |                      |        |                      |        | 1                    |        |
|                                                                                                                            |                                           | Yes                     | 173877      |                     |        |                      |        |                      |        |                      |        | 6.849 (6.275; 7.493) |        |

<sup>1</sup> Reference category

**Mammography uptake multivariable logistic regression models (n= 154895): in > 74 y.o. women (Mammography uptake = 5.65%)**

|                                           |                                           |                         | N           | Model 1             | LogLik               | Model 2             | LogLik               | Model 3             | LogLik               | Model 4             | LogLik               | Model 5             | LogLik |
|-------------------------------------------|-------------------------------------------|-------------------------|-------------|---------------------|----------------------|---------------------|----------------------|---------------------|----------------------|---------------------|----------------------|---------------------|--------|
|                                           |                                           |                         | Tot= 154895 | OR (95%CI)          | -33537               | OR (95%CI)          | -30948               | OR (95%CI)          | -30936               | OR (95%CI)          | -30890               | OR (95%CI)          | -30674 |
| <b>Combined EDI and large urban/other</b> | <b>EDI (deciles) in large urban areas</b> | 1 <sup>2</sup>          | 939         | 1                   |                      | 1                   |                      | 1                   |                      | 1                   |                      | 1                   |        |
|                                           |                                           | 2                       | 2115        | 1.022 (0.904,1.154) |                      | 1.026 (0.906,1.162) |                      | 0.983 (0.95,1.018)  |                      | 0.998 (0.88,1.131)  |                      | 0.994 (0.877,1.127) |        |
|                                           |                                           | 3                       | 3983        | 0.968 (0.849,1.104) |                      | 1.009 (0.883,1.154) |                      | 0.971 (0.934,1.009) |                      | 0.978 (0.855,1.119) |                      | 0.973 (0.85,1.114)  |        |
|                                           |                                           | 4                       | 6092        | 0.921 (0.803,1.055) |                      | 0.921 (0.802,1.058) |                      | 0.939 (0.902,0.976) |                      | 0.883 (0.769,1.015) |                      | 0.88 (0.765,1.011)  |        |
|                                           |                                           | 5                       | 5757        | 0.893 (0.784,1.017) |                      | 0.956 (0.838,1.092) |                      | 0.897 (0.863,0.933) |                      | 0.898 (0.785,1.027) |                      | 0.892 (0.779,1.02)  |        |
|                                           |                                           | 6                       | 9950        | 0.891 (0.784,1.013) |                      | 0.945 (0.829,1.077) |                      | 0.936 (0.901,0.973) |                      | 0.878 (0.769,1.002) |                      | 0.873 (0.765,0.997) |        |
|                                           |                                           | 7                       | 10334       | 0.896 (0.789,1.019) |                      | 0.973 (0.854,1.108) |                      | 0.858 (0.825,0.892) |                      | 0.88 (0.77,1.006)   |                      | 0.879 (0.769,1.005) |        |
|                                           |                                           | 8                       | 10647       | 0.99 (0.873,1.123)  |                      | 1.088 (0.957,1.238) |                      | 0.885 (0.85,0.922)  |                      | 0.987 (0.865,1.127) |                      | 0.982 (0.86,1.121)  |        |
|                                           |                                           | 9                       | 10974       | 0.926 (0.821,1.044) |                      | 1.029 (0.911,1.163) |                      | 0.855 (0.823,0.888) |                      | 0.89 (0.782,1.012)  |                      | 0.886 (0.779,1.008) |        |
|                                           |                                           | 10                      | 9307        | 0.899 (0.802,1.007) |                      | 0.977 (0.87,1.097)  |                      | 0.763 (0.737,0.79)  |                      | 0.837 (0.74,0.948)  |                      | 0.835 (0.738,0.946) |        |
|                                           | <b>EDI (deciles) in other</b>             | 1                       | 7482        | 0.77 (0.572,1.039)  |                      | 0.765 (0.565,1.035) |                      | 0.784 (0.719,0.855) |                      | 0.793 (0.584,1.075) |                      | 0.786 (0.579,1.066) |        |
|                                           |                                           | 2                       | 8759        | 0.78 (0.633,0.962)  |                      | 0.767 (0.62,0.948)  |                      | 0.845 (0.795,0.897) |                      | 0.791 (0.64,0.979)  |                      | 0.782 (0.632,0.968) |        |
|                                           |                                           | 3                       | 6862        | 0.701 (0.592,0.831) |                      | 0.708 (0.596,0.841) |                      | 0.817 (0.778,0.858) |                      | 0.742 (0.623,0.882) |                      | 0.733 (0.616,0.872) |        |
|                                           |                                           | 4                       | 6193        | 0.645 (0.555,0.75)  |                      | 0.671 (0.576,0.782) |                      | 0.833 (0.797,0.871) |                      | 0.662 (0.568,0.772) |                      | 0.659 (0.565,0.769) |        |
|                                           |                                           | 5                       | 7566        | 0.539 (0.458,0.634) |                      | 0.552 (0.468,0.65)  |                      | 0.78 (0.746,0.817)  |                      | 0.55 (0.466,0.649)  |                      | 0.547 (0.463,0.646) |        |
|                                           |                                           | 6                       | 8023        | 0.696 (0.612,0.791) |                      | 0.726 (0.637,0.827) |                      | 0.838 (0.805,0.871) |                      | 0.692 (0.607,0.79)  |                      | 0.686 (0.601,0.783) |        |
|                                           |                                           | 7                       | 8076        | 0.65 (0.571,0.739)  |                      | 0.696 (0.61,0.794)  |                      | 0.824 (0.792,0.857) |                      | 0.657 (0.575,0.751) |                      | 0.65 (0.569,0.743)  |        |
|                                           |                                           | 8                       | 7774        | 0.728 (0.642,0.825) |                      | 0.774 (0.681,0.878) |                      | 0.833 (0.802,0.866) |                      | 0.727 (0.638,0.828) |                      | 0.717 (0.629,0.816) |        |
|                                           |                                           | 9                       | 10269       | 0.706 (0.623,0.8)   |                      | 0.776 (0.683,0.881) |                      | 0.762 (0.733,0.792) |                      | 0.728 (0.64,0.829)  |                      | 0.72 (0.632,0.82)   |        |
|                                           |                                           | 10                      | 13793       | 0.693 (0.608,0.79)  |                      | 0.757 (0.663,0.864) |                      | 0.718 (0.688,0.75)  |                      | 0.675 (0.588,0.775) |                      | 0.666 (0.58,0.765)  |        |
|                                           | <b>Age</b>                                | 75-80 y.o. <sup>2</sup> | 50815       |                     |                      | 1                   |                      | 1                   |                      | 1                   |                      | 1                   |        |
| 80-85 y.o.                                |                                           | 48148                   |             |                     | 0.387 (0.368; 0.407) |                     | 0.387 (0.368; 0.407) |                     | 0.386 (0.367; 0.406) |                     | 0.385 (0.366; 0.405) |                     |        |
| 85-90 y.o.                                |                                           | 34698                   |             |                     | 0.152 (0.14; 0.165)  |                     | 0.152 (0.14; 0.165)  |                     | 0.151 (0.139; 0.164) |                     | 0.151 (0.139; 0.164) |                     |        |
| 90-95 y.o.                                |                                           | 16602                   |             |                     | 0.067 (0.057; 0.079) |                     | 0.067 (0.057; 0.079) |                     | 0.067 (0.056; 0.079) |                     | 0.067 (0.056; 0.079) |                     |        |
| 95-100 y.o.                               |                                           | 4632                    |             |                     | 0.024 (0.013; 0.038) |                     | 0.024 (0.013; 0.038) |                     | 0.023 (0.013; 0.038) |                     | 0.025 (0.014; 0.04)  |                     |        |
| <b>CMU-C</b>                              | No <sup>2</sup>                           | 153807                  |             |                     |                      |                     | 1                    |                     | 1                    |                     | 1                    |                     |        |
|                                           | Yes                                       | 1088                    |             |                     |                      |                     | 0.443 (0.298; 0.63)  |                     | 0.443 (0.298; 0.63)  |                     | 0.439 (0.295; 0.625) |                     |        |
| <b>GP PLA (deciles)</b>                   | 1 <sup>2</sup>                            | 4675                    |             |                     |                      |                     |                      |                     | 1                    |                     | 1                    |                     |        |
|                                           | 2                                         | 5726                    |             |                     |                      |                     |                      |                     | 1.14 (0.94; 1.386)   |                     | 1.138 (0.938; 1.383) |                     |        |
|                                           | 3                                         | 5537                    |             |                     |                      |                     |                      |                     | 1.037 (0.851; 1.265) |                     | 1.035 (0.85; 1.263)  |                     |        |
|                                           | 4                                         | 7717                    |             |                     |                      |                     |                      |                     | 1.091 (0.909; 1.314) |                     | 1.085 (0.904; 1.306) |                     |        |
|                                           | 5                                         | 9569                    |             |                     |                      |                     |                      |                     | 1.171 (0.983; 1.399) |                     | 1.17 (0.983; 1.399)  |                     |        |
|                                           | 6                                         | 11747                   |             |                     |                      |                     |                      |                     | 1.25 (1.056; 1.486)  |                     | 1.25 (1.055; 1.486)  |                     |        |
|                                           | 7                                         | 18800                   |             |                     |                      |                     |                      |                     | 1.316 (1.12; 1.554)  |                     | 1.312 (1.117; 1.549) |                     |        |
|                                           | 8                                         | 25658                   |             |                     |                      |                     |                      |                     | 1.441 (1.231; 1.694) |                     | 1.44 (1.231; 1.695)  |                     |        |
|                                           | 9                                         | 30207                   |             |                     |                      |                     |                      |                     | 1.398 (1.195; 1.644) |                     | 1.403 (1.199; 1.65)  |                     |        |
|                                           | 10                                        | 35259                   |             |                     |                      |                     |                      |                     | 1.546 (1.322; 1.818) |                     | 1.555 (1.329; 1.829) |                     |        |
| <b>Referring physician</b>                | No <sup>2</sup>                           | 5992                    |             |                     |                      |                     |                      |                     |                      |                     | 1                    |                     |        |
|                                           | Yes                                       | 148903                  |             |                     |                      |                     |                      |                     |                      |                     | 8.938 (6.66; 12.37)  |                     |        |

<sup>2</sup> Reference category

## Pap smear uptake multivariable logistic regression models (n= 63068) in 20-25 y.o. women (Pap smear uptake = 20.58 %)

|                                           |                                           | N              | Model 1<br>LogLik    | Model 2<br>LogLik    | Model 3<br>LogLik    | Model 4<br>LogLik    | Model 5<br>LogLik    |
|-------------------------------------------|-------------------------------------------|----------------|----------------------|----------------------|----------------------|----------------------|----------------------|
|                                           |                                           | Tot= 63068     | OR (95%CI) -31988    | OR (95%CI) -31676    | OR (95%CI) -31675    | OR (95%CI) -31670    | OR (95%CI) -30989    |
| <b>Combined EDI and large urban/other</b> | <b>EDI (deciles) in large urban areas</b> | 1 <sup>3</sup> | 1                    | 1                    | 1                    | 1                    | 1                    |
|                                           | 2                                         | 272            | 0.958 (0.864; 1.062) | 0.951 (0.858; 1.056) | 0.952 (0.859; 1.057) | 0.956 (0.861; 1.062) | 0.941 (0.846; 1.046) |
|                                           | 3                                         | 600            | 0.992 (0.888; 1.108) | 0.985 (0.881; 1.101) | 0.987 (0.882; 1.103) | 0.987 (0.882; 1.105) | 0.975 (0.87; 1.093)  |
|                                           | 4                                         | 1047           | 1.024 (0.914; 1.146) | 1.021 (0.911; 1.143) | 1.022 (0.913; 1.145) | 1.029 (0.918; 1.154) | 1.021 (0.91; 1.146)  |
|                                           | 5                                         | 1451           | 0.915 (0.823; 1.017) | 0.905 (0.813; 1.007) | 0.907 (0.815; 1.009) | 0.922 (0.827; 1.028) | 0.921 (0.825; 1.028) |
|                                           | 6                                         | 1412           | 0.896 (0.803; 0.999) | 0.889 (0.797; 0.992) | 0.892 (0.799; 0.995) | 0.903 (0.808; 1.009) | 0.895 (0.8; 1.002)   |
|                                           | 7                                         | 2197           | 0.92 (0.828; 1.023)  | 0.901 (0.81; 1.002)  | 0.903 (0.812; 1.005) | 0.923 (0.827; 1.03)  | 0.94 (0.841; 1.05)   |
|                                           | 8                                         | 2336           | 0.917 (0.824; 1.02)  | 0.895 (0.804; 0.997) | 0.898 (0.806; 1)     | 0.925 (0.828; 1.033) | 0.938 (0.838; 1.049) |
|                                           | 9                                         | 2376           | 0.824 (0.746; 0.909) | 0.801 (0.726; 0.885) | 0.804 (0.728; 0.889) | 0.834 (0.751; 0.927) | 0.858 (0.771; 0.954) |
|                                           | 10                                        | 2575           | 0.735 (0.67; 0.808)  | 0.733 (0.667; 0.805) | 0.739 (0.672; 0.812) | 0.772 (0.697; 0.856) | 0.802 (0.722; 0.89)  |
| <b>EDI (deciles) in other areas</b>       | 1                                         | 2484           | 0.696 (0.498; 0.953) | 0.701 (0.501; 0.961) | 0.701 (0.501; 0.962) | 0.701 (0.5; 0.962)   | 0.729 (0.519; 1.005) |
|                                           | 2                                         | 3700           | 0.895 (0.723; 1.101) | 0.903 (0.729; 1.112) | 0.903 (0.729; 1.113) | 0.904 (0.729; 1.114) | 0.902 (0.726; 1.114) |
|                                           | 3                                         | 4599           | 0.938 (0.794; 1.105) | 0.956 (0.809; 1.127) | 0.957 (0.809; 1.128) | 0.964 (0.814; 1.138) | 0.963 (0.812; 1.139) |
|                                           | 4                                         | 3387           | 0.779 (0.669; 0.906) | 0.78 (0.669; 0.908)  | 0.781 (0.67; 0.909)  | 0.788 (0.675; 0.917) | 0.784 (0.671; 0.914) |
|                                           | 5                                         | 3098           | 0.846 (0.727; 0.983) | 0.852 (0.731; 0.99)  | 0.853 (0.732; 0.992) | 0.859 (0.736; 0.999) | 0.849 (0.727; 0.989) |
|                                           | 6                                         | 4188           | 0.839 (0.737; 0.955) | 0.849 (0.745; 0.966) | 0.85 (0.746; 0.967)  | 0.858 (0.752; 0.977) | 0.849 (0.744; 0.969) |
|                                           | 7                                         | 3814           | 0.835 (0.735; 0.948) | 0.838 (0.737; 0.951) | 0.84 (0.739; 0.954)  | 0.855 (0.751; 0.972) | 0.837 (0.735; 0.954) |
|                                           | 8                                         | 4205           | 0.77 (0.677; 0.875)  | 0.776 (0.682; 0.882) | 0.778 (0.683; 0.885) | 0.789 (0.692; 0.899) | 0.78 (0.683; 0.89)   |
|                                           | 9                                         | 4074           | 0.797 (0.704; 0.902) | 0.809 (0.713; 0.916) | 0.812 (0.716; 0.919) | 0.823 (0.725; 0.934) | 0.826 (0.726; 0.939) |
|                                           | 10                                        | 6237           | 0.655 (0.574; 0.746) | 0.661 (0.579; 0.754) | 0.665 (0.582; 0.758) | 0.688 (0.6; 0.787)   | 0.701 (0.61; 0.803)  |
| <b>Age</b>                                | 20-21y.o. <sup>3</sup>                    | 9827           |                      | 1                    | 1                    | 1                    | 1                    |
|                                           | 21-22 y.o.                                | 11080          |                      | 1.234 (1.144; 1.33)  | 1.233 (1.144; 1.33)  | 1.234 (1.144; 1.33)  | 1.205 (1.117; 1.3)   |
|                                           | 22-23 y.o.                                | 12631          |                      | 1.516 (1.411; 1.628) | 1.514 (1.41; 1.626)  | 1.516 (1.412; 1.628) | 1.435 (1.335; 1.543) |
|                                           | 23-24 y.o.                                | 14064          |                      | 1.709 (1.595; 1.832) | 1.707 (1.593; 1.83)  | 1.711 (1.597; 1.834) | 1.576 (1.47; 1.691)  |
|                                           | 24-25 y.o.                                | 15466          |                      | 2.102 (1.966; 2.249) | 2.099 (1.963; 2.246) | 2.104 (1.967; 2.25)  | 1.912 (1.787; 2.047) |
| <b>CMU-C</b>                              | No <sup>3</sup>                           | 54768          |                      |                      | 1                    | 1                    | 1                    |
|                                           | Yes                                       | 8300           |                      |                      | 0.968 (0.911; 1.028) | 0.969 (0.912; 1.029) | 0.899 (0.845; 0.955) |
| <b>GP PLA (deciles)</b>                   | 1 <sup>3</sup>                            | 1167           |                      |                      |                      | 1                    | 1                    |
|                                           | 2                                         | 1569           |                      |                      |                      | 1.057 (0.873; 1.281) | 1.033 (0.851; 1.254) |
|                                           | 3                                         | 1626           |                      |                      |                      | 1.09 (0.903; 1.318)  | 1.069 (0.884; 1.295) |
|                                           | 4                                         | 2498           |                      |                      |                      | 1.096 (0.92; 1.307)  | 1.075 (0.902; 1.285) |
|                                           | 5                                         | 3594           |                      |                      |                      | 1.07 (0.906; 1.268)  | 1.055 (0.891; 1.252) |
|                                           | 6                                         | 4813           |                      |                      |                      | 1.026 (0.872; 1.21)  | 1.018 (0.864; 1.203) |
|                                           | 7                                         | 7959           |                      |                      |                      | 1.055 (0.902; 1.238) | 1.039 (0.887; 1.222) |
|                                           | 8                                         | 10982          |                      |                      |                      | 1.074 (0.92; 1.257)  | 1.054 (0.902; 1.236) |
|                                           | 9                                         | 12533          |                      |                      |                      | 1.021 (0.875; 1.196) | 1.011 (0.865; 1.186) |
|                                           | 10                                        | 16327          |                      |                      |                      | 0.986 (0.845; 1.155) | 1.004 (0.859; 1.178) |
| <b>Referring physician</b>                | No <sup>3</sup>                           | 13716          |                      |                      |                      |                      | 1                    |
|                                           | Yes                                       | 49352          |                      |                      |                      |                      | 2.859 (2.69; 3.042)  |

<sup>3</sup> Reference category

**Pap smear uptake multivariable logistic regression models (n= 252156) in > 65 y.o. women (Pap smear uptake = 5.69%)**

|                                                 |                                           |                | N                    | Model 1              | LogLik               | Model 2              | LogLik               | Model 3              | LogLik               | Model 4              | LogLik | Model 5               | LogLik |
|-------------------------------------------------|-------------------------------------------|----------------|----------------------|----------------------|----------------------|----------------------|----------------------|----------------------|----------------------|----------------------|--------|-----------------------|--------|
|                                                 |                                           |                | Tot= 252156          | OR (95%CI)           | -54676               | OR (95%CI)           | -48204               | OR (95%CI)           | -48196               | OR (95%CI)           | -48125 | OR (95%CI)            | -47675 |
| <b>Combined EDI and large urban/other areas</b> | <b>EDI (deciles) in large urban areas</b> | 1 <sup>4</sup> | 1669                 | 1                    |                      | 1                    |                      | 1                    |                      | 1                    |        | 1                     |        |
|                                                 |                                           | 2              | 3720                 | 0.875 (0.805,0.951)  |                      | 0.904 (0.83,0.985)   |                      | 0.905 (0.83,0.985)   |                      | 0.874 (0.801,0.953)  |        | 0.865 (0.793,0.944)   |        |
|                                                 |                                           | 3              | 6672                 | 0.822 (0.75,0.901)   |                      | 0.903 (0.821,0.992)  |                      | 0.903 (0.821,0.992)  |                      | 0.874 (0.795,0.961)  |        | 0.866 (0.787,0.953)   |        |
|                                                 |                                           | 4              | 9800                 | 0.786 (0.714,0.865)  |                      | 0.859 (0.779,0.948)  |                      | 0.86 (0.78,0.949)    |                      | 0.825 (0.748,0.911)  |        | 0.817 (0.74,0.902)    |        |
|                                                 |                                           | 5              | 9294                 | 0.743 (0.677,0.815)  |                      | 0.858 (0.78,0.944)   |                      | 0.859 (0.782,0.945)  |                      | 0.809 (0.735,0.891)  |        | 0.805 (0.731,0.887)   |        |
|                                                 |                                           | 6              | 15807                | 0.641 (0.584,0.705)  |                      | 0.738 (0.669,0.813)  |                      | 0.738 (0.67,0.813)   |                      | 0.687 (0.622,0.758)  |        | 0.679 (0.615,0.749)   |        |
|                                                 |                                           | 7              | 16336                | 0.69 (0.628,0.757)   |                      | 0.833 (0.757,0.917)  |                      | 0.834 (0.757,0.918)  |                      | 0.763 (0.691,0.842)  |        | 0.764 (0.692,0.843)   |        |
|                                                 |                                           | 8              | 16801                | 0.796 (0.727,0.872)  |                      | 0.982 (0.894,1.079)  |                      | 0.984 (0.895,1.081)  |                      | 0.898 (0.815,0.99)   |        | 0.895 (0.812,0.987)   |        |
|                                                 |                                           | 9              | 17022                | 0.685 (0.628,0.748)  |                      | 0.855 (0.781,0.936)  |                      | 0.858 (0.784,0.94)   |                      | 0.748 (0.68,0.823)   |        | 0.745 (0.677,0.82)    |        |
|                                                 |                                           | 10             | 14130                | 0.647 (0.596,0.702)  |                      | 0.789 (0.725,0.858)  |                      | 0.795 (0.73,0.865)   |                      | 0.68 (0.621,0.745)   |        | 0.678 (0.619,0.743)   |        |
|                                                 | <b>EDI (deciles) in other areas</b>       | 1              | 14042                | 0.641 (0.517,0.795)  |                      | 0.669 (0.537,0.834)  |                      | 0.668 (0.536,0.833)  |                      | 0.693 (0.555,0.865)  |        | 0.687 (0.55,0.858)    |        |
|                                                 |                                           | 2              | 15838                | 0.571 (0.488,0.669)  |                      | 0.6 (0.511,0.705)    |                      | 0.6 (0.511,0.704)    |                      | 0.616 (0.524,0.724)  |        | 0.607 (0.516,0.714)   |        |
|                                                 |                                           | 3              | 11781                | 0.556 (0.49,0.63)    |                      | 0.616 (0.542,0.7)    |                      | 0.616 (0.542,0.7)    |                      | 0.635 (0.558,0.723)  |        | 0.628 (0.551,0.715)   |        |
|                                                 |                                           | 4              | 10633                | 0.522 (0.467,0.583)  |                      | 0.61 (0.545,0.683)   |                      | 0.61 (0.545,0.683)   |                      | 0.603 (0.538,0.676)  |        | 0.596 (0.532,0.668)   |        |
|                                                 |                                           | 5              | 12461                | 0.456 (0.405,0.513)  |                      | 0.524 (0.464,0.591)  |                      | 0.524 (0.464,0.591)  |                      | 0.526 (0.466,0.594)  |        | 0.519 (0.459,0.586)   |        |
|                                                 |                                           | 6              | 13160                | 0.5 (0.454,0.55)     |                      | 0.598 (0.542,0.659)  |                      | 0.598 (0.542,0.659)  |                      | 0.577 (0.522,0.637)  |        | 0.569 (0.515,0.629)   |        |
|                                                 |                                           | 7              | 12897                | 0.497 (0.452,0.547)  |                      | 0.599 (0.544,0.66)   |                      | 0.6 (0.544,0.661)    |                      | 0.572 (0.518,0.631)  |        | 0.564 (0.511,0.623)   |        |
|                                                 |                                           | 8              | 12297                | 0.508 (0.463,0.558)  |                      | 0.612 (0.556,0.673)  |                      | 0.612 (0.556,0.674)  |                      | 0.579 (0.525,0.639)  |        | 0.57 (0.516,0.629)    |        |
|                                                 |                                           | 9              | 15991                | 0.436 (0.396,0.481)  |                      | 0.535 (0.484,0.591)  |                      | 0.535 (0.485,0.591)  |                      | 0.503 (0.454,0.556)  |        | 0.495 (0.447,0.548)   |        |
|                                                 |                                           | 10             | 21805                | 0.461 (0.416,0.51)   |                      | 0.587 (0.529,0.651)  |                      | 0.589 (0.53,0.653)   |                      | 0.528 (0.474,0.588)  |        | 0.519 (0.466,0.578)   |        |
| <b>Age</b>                                      | 65-70 y.o. <sup>4</sup>                   | 48684          |                      | 1                    |                      | 1                    |                      | 1                    |                      | 1                    |        | 1                     |        |
|                                                 | 70-75 y.o.                                | 48577          |                      | 0.583 (0.56; 0.607)  |                      | 0.582 (0.559; 0.606) |                      | 0.581 (0.558; 0.605) |                      | 0.578 (0.555; 0.601) |        |                       |        |
|                                                 | 75-80 y.o.                                | 50815          |                      | 0.252 (0.24; 0.266)  |                      | 0.252 (0.239; 0.265) |                      | 0.251 (0.238; 0.264) |                      | 0.247 (0.234; 0.26)  |        |                       |        |
|                                                 | 80-85 y.o.                                | 48148          |                      | 0.094 (0.087; 0.102) |                      | 0.094 (0.087; 0.101) |                      | 0.093 (0.086; 0.101) |                      | 0.092 (0.085; 0.099) |        |                       |        |
|                                                 | 85-90 y.o.                                | 34698          |                      | 0.03 (0.026; 0.035)  |                      | 0.03 (0.026; 0.035)  |                      | 0.03 (0.026; 0.035)  |                      | 0.029 (0.025; 0.034) |        |                       |        |
|                                                 | 90-95 y.o.                                | 16602          |                      | 0.013 (0.01; 0.018)  |                      | 0.013 (0.01; 0.018)  |                      | 0.013 (0.009; 0.018) |                      | 0.013 (0.009; 0.018) |        |                       |        |
| 95-100 y.o.                                     | 4632                                      |                | 0.005 (0.002; 0.012) |                      | 0.005 (0.002; 0.012) |                      | 0.005 (0.002; 0.012) |                      | 0.005 (0.002; 0.012) |                      |        |                       |        |
| <b>CMU-C</b>                                    | No <sup>4</sup>                           | 249945         |                      |                      |                      | 1                    |                      | 1                    |                      | 1                    |        | 1                     |        |
|                                                 | Yes                                       | 2211           |                      |                      |                      | 0.68 (0.558; 0.821)  |                      | 0.676 (0.555; 0.816) |                      | 0.67 (0.55; 0.809)   |        |                       |        |
| <b>GP PLA (deciles)</b>                         | 1 <sup>4</sup>                            | 7805           |                      |                      |                      |                      |                      | 1                    |                      | 1                    |        | 1                     |        |
|                                                 | 2                                         | 9343           |                      |                      |                      |                      |                      | 0.85 (0.731; 0.989)  |                      | 0.842 (0.724; 0.98)  |        |                       |        |
|                                                 | 3                                         | 9254           |                      |                      |                      |                      |                      | 0.885 (0.763; 1.028) |                      | 0.886 (0.763; 1.029) |        |                       |        |
|                                                 | 4                                         | 12955          |                      |                      |                      |                      |                      | 1.004 (0.877; 1.151) |                      | 0.995 (0.869; 1.141) |        |                       |        |
|                                                 | 5                                         | 16421          |                      |                      |                      |                      |                      | 1.054 (0.927; 1.202) |                      | 1.053 (0.926; 1.201) |        |                       |        |
|                                                 | 6                                         | 19914          |                      |                      |                      |                      |                      | 1.088 (0.96; 1.237)  |                      | 1.08 (0.952; 1.227)  |        |                       |        |
|                                                 | 7                                         | 31912          |                      |                      |                      |                      |                      | 1.147 (1.017; 1.296) |                      | 1.14 (1.011; 1.289)  |        |                       |        |
|                                                 | 8                                         | 42273          |                      |                      |                      |                      |                      | 1.223 (1.087; 1.379) |                      | 1.214 (1.08; 1.37)   |        |                       |        |
|                                                 | 9                                         | 47761          |                      |                      |                      |                      |                      | 1.282 (1.14; 1.446)  |                      | 1.282 (1.14; 1.446)  |        |                       |        |
|                                                 | 10                                        | 54518          |                      |                      |                      |                      |                      | 1.319 (1.173; 1.488) |                      | 1.327 (1.179; 1.497) |        |                       |        |
| <b>Referring physician</b>                      | No <sup>4</sup>                           | 10487          |                      |                      |                      |                      |                      |                      |                      |                      |        | 1                     |        |
|                                                 | Yes                                       | 241669         |                      |                      |                      |                      |                      |                      |                      |                      |        | 9.629 (7.764; 12.133) |        |

<sup>4</sup> Reference category

1  
2  
3  
4  
5  
6  
7  
8  
9  
10  
11  
12  
13  
14  
15  
16  
17  
18  
19  
20  
21  
22  
23  
24  
25  
26  
27  
28  
29  
30  
31  
32  
33  
34  
35  
36  
37  
38  
39  
40  
41  
42  
43  
44  
45  
46

For peer review only

STROBE Statement—checklist of items included in the study “Social and territorial inequalities in gynaecological cancers screening uptake in France”

|                              | Item No | Recommendation                                                                                                                                                                                                                                                                                                                                                                                                                                                         |   | Page number |
|------------------------------|---------|------------------------------------------------------------------------------------------------------------------------------------------------------------------------------------------------------------------------------------------------------------------------------------------------------------------------------------------------------------------------------------------------------------------------------------------------------------------------|---|-------------|
| <b>Title and abstract</b>    | 1       | (a) Indicate the study’s design with a commonly used term in the title or the abstract                                                                                                                                                                                                                                                                                                                                                                                 | X | 1           |
|                              |         | (b) Provide in the abstract an informative and balanced summary of what was done and what was found                                                                                                                                                                                                                                                                                                                                                                    | X | 2           |
| <b>Introduction</b>          |         |                                                                                                                                                                                                                                                                                                                                                                                                                                                                        |   |             |
| Background/rationale         | 2       | Explain the scientific background and rationale for the investigation being reported                                                                                                                                                                                                                                                                                                                                                                                   | X | 5           |
| Objectives                   | 3       | State specific objectives, including any prespecified hypotheses                                                                                                                                                                                                                                                                                                                                                                                                       | X | 5           |
| <b>Methods</b>               |         |                                                                                                                                                                                                                                                                                                                                                                                                                                                                        |   |             |
| Study design                 | 4       | Present key elements of study design early in the paper                                                                                                                                                                                                                                                                                                                                                                                                                | X | 6           |
| Setting                      | 5       | Describe the setting, locations, and relevant dates, including periods of recruitment, exposure, follow-up, and data collection                                                                                                                                                                                                                                                                                                                                        | X | 6           |
| Participants                 | 6       | (a) <i>Cohort study</i> —Give the eligibility criteria, and the sources and methods of selection of participants. Describe methods of follow-up<br><i>Case-control study</i> —Give the eligibility criteria, and the sources and methods of case ascertainment and control selection. Give the rationale for the choice of cases and controls<br><i>Cross-sectional study</i> —Give the eligibility criteria, and the sources and methods of selection of participants | X | 6           |
|                              |         | (b) <i>Cohort study</i> —For matched studies, give matching criteria and number of exposed and unexposed<br><i>Case-control study</i> —For matched studies, give matching criteria and the number of controls per case                                                                                                                                                                                                                                                 |   |             |
| Variables                    | 7       | Clearly define all outcomes, exposures, predictors, potential confounders, and effect modifiers. Give diagnostic criteria, if applicable                                                                                                                                                                                                                                                                                                                               | X | 6-8         |
| Data sources/<br>measurement | 8*      | For each variable of interest, give sources of data and details of methods of assessment (measurement). Describe comparability of assessment methods if there is more than one group                                                                                                                                                                                                                                                                                   | X | 6-8         |
| Bias                         | 9       | Describe any efforts to address potential sources of bias                                                                                                                                                                                                                                                                                                                                                                                                              | X | 6-9         |
| Study size                   | 10      | Explain how the study size was arrived at                                                                                                                                                                                                                                                                                                                                                                                                                              | X | 6           |
| Quantitative<br>variables    | 11      | Explain how quantitative variables were handled in the analyses. If applicable, describe which groupings were chosen and why                                                                                                                                                                                                                                                                                                                                           | X | 6-8         |
| Statistical methods          | 12      | (a) Describe all statistical methods, including those used to control for confounding                                                                                                                                                                                                                                                                                                                                                                                  | X | 8-9         |
|                              |         | (b) Describe any methods used to examine subgroups and interactions                                                                                                                                                                                                                                                                                                                                                                                                    | X | 9           |
|                              |         | (c) Explain how missing data were addressed                                                                                                                                                                                                                                                                                                                                                                                                                            | X | 9           |
|                              |         | (d) <i>Cohort study</i> —If applicable, explain how loss to follow-up was addressed<br><i>Case-control study</i> —If applicable, explain how matching of cases and controls was addressed<br><i>Cross-sectional study</i> —If applicable, describe analytical methods taking account of sampling strategy                                                                                                                                                              |   |             |
|                              |         | (e) Describe any sensitivity analyses                                                                                                                                                                                                                                                                                                                                                                                                                                  |   |             |



| <b>Results</b>           |     |                                                                                                                                                                                                              |   |                                      |
|--------------------------|-----|--------------------------------------------------------------------------------------------------------------------------------------------------------------------------------------------------------------|---|--------------------------------------|
| Participants             | 13* | (a) Report numbers of individuals at each stage of study—eg numbers potentially eligible, examined for eligibility, confirmed eligible, included in the study, completing follow-up, and analysed            | X | 7+10                                 |
|                          |     | (b) Give reasons for non-participation at each stage                                                                                                                                                         | X | 6+9                                  |
|                          |     | (c) Consider use of a flow diagram                                                                                                                                                                           | X | 9 (no figure)                        |
| Descriptive data         | 14* | (a) Give characteristics of study participants (eg demographic, clinical, social) and information on exposures and potential confounders                                                                     | X | 9-10 + table 1 + suppl. Tables A     |
|                          |     | (b) Indicate number of participants with missing data for each variable of interest                                                                                                                          | X | 9                                    |
|                          |     | (c) <i>Cohort study</i> —Summarise follow-up time (eg, average and total amount)                                                                                                                             |   |                                      |
| Outcome data             | 15* | <i>Cohort study</i> —Report numbers of outcome events or summary measures over time                                                                                                                          |   |                                      |
|                          |     | <i>Case-control study</i> —Report numbers in each exposure category, or summary measures of exposure                                                                                                         |   |                                      |
|                          |     | <i>Cross-sectional study</i> —Report numbers of outcome events or summary measures                                                                                                                           | X | 10-11 + Table 1                      |
| Main results             | 16  | (a) Give unadjusted estimates and, if applicable, confounder-adjusted estimates and their precision (eg, 95% confidence interval). Make clear which confounders were adjusted for and why they were included | X | 10-11+ Tables 2/3                    |
|                          |     | (b) Report category boundaries when continuous variables were categorized                                                                                                                                    | X | 8-10 + Tables 2/3                    |
|                          |     | (c) If relevant, consider translating estimates of relative risk into absolute risk for a meaningful time period                                                                                             |   |                                      |
| Other analyses           | 17  | Report other analyses done—eg analyses of subgroups and interactions, and sensitivity analyses                                                                                                               | X | 12-13 + Tables 2/3 + Suppl. Tables B |
| <b>Discussion</b>        |     |                                                                                                                                                                                                              |   |                                      |
| Key results              | 18  | Summarise key results with reference to study objectives                                                                                                                                                     | X | 16                                   |
| Limitations              | 19  | Discuss limitations of the study, taking into account sources of potential bias or imprecision. Discuss both direction and magnitude of any potential bias                                                   | X | 16                                   |
| Interpretation           | 20  | Give a cautious overall interpretation of results considering objectives, limitations, multiplicity of analyses, results from similar studies, and other relevant evidence                                   | X | 16-19                                |
| Generalisability         | 21  | Discuss the generalisability (external validity) of the study results                                                                                                                                        | X | 16-19                                |
| <b>Other information</b> |     |                                                                                                                                                                                                              |   |                                      |
| Funding                  | 22  | Give the source of funding and the role of the funders for the present study and, if applicable, for the original study on which the present article is based                                                | X | 21                                   |

\*Give information separately for cases and controls in case-control studies and, if applicable, for exposed and unexposed groups in cohort and cross-sectional studies.

**Note:** An Explanation and Elaboration article discusses each checklist item and gives methodological background and published examples of transparent reporting. The STROBE checklist is best used in conjunction with this article (freely available on the Web sites of PLoS Medicine at <http://www.plosmedicine.org/>, Annals of Internal Medicine at

1  
2 <http://www.annals.org/>, and *Epidemiology* at <http://www.epidem.com/>). Information on the STROBE Initiative is  
3 available at [www.strobe-statement.org](http://www.strobe-statement.org).  
4  
5  
6  
7  
8  
9  
10  
11  
12  
13  
14  
15  
16  
17  
18  
19  
20  
21  
22  
23  
24  
25  
26  
27  
28  
29  
30  
31  
32  
33  
34  
35  
36  
37  
38  
39  
40  
41  
42  
43  
44  
45  
46  
47  
48  
49  
50  
51  
52  
53  
54  
55  
56  
57  
58  
59  
60

For peer review only

# BMJ Open

## Social and territorial inequalities in gynaecological cancers screening uptake: a cross-sectional study in France

|                                 |                                                                                                                                                                                                                                                                                                                                                                                                                                                                                                                                                                                                                                                                                           |
|---------------------------------|-------------------------------------------------------------------------------------------------------------------------------------------------------------------------------------------------------------------------------------------------------------------------------------------------------------------------------------------------------------------------------------------------------------------------------------------------------------------------------------------------------------------------------------------------------------------------------------------------------------------------------------------------------------------------------------------|
| Journal:                        | <i>BMJ Open</i>                                                                                                                                                                                                                                                                                                                                                                                                                                                                                                                                                                                                                                                                           |
| Manuscript ID                   | bmjopen-2021-055363.R1                                                                                                                                                                                                                                                                                                                                                                                                                                                                                                                                                                                                                                                                    |
| Article Type:                   | Original research                                                                                                                                                                                                                                                                                                                                                                                                                                                                                                                                                                                                                                                                         |
| Date Submitted by the Author:   | 14-Dec-2021                                                                                                                                                                                                                                                                                                                                                                                                                                                                                                                                                                                                                                                                               |
| Complete List of Authors:       | <p>Ouanhnon, Lisa; Université Toulouse III Paul Sabatier, DUMG (Département Universitaire de Médecine Générale); INSERM UMR_S 1027, CERPOP</p> <p>Rougé Bugat, Marie-Eve ; Université Toulouse III Paul Sabatier, DUMG (Département Universitaire de Médecine Générale); INSERM UMR_S 1027, CERPOP</p> <p>LAMY, Sebastien; Institute Claudius Regaud; INSERM UMR_S 1027</p> <p>Druel, Vladimir; Université Toulouse III Paul Sabatier, DUMG (Département Universitaire de Médecine Générale); INSERM UMR_S 1027, CERPOP</p> <p>Delpierre, Cyrille; INSERM UMR_S 1027; Université Toulouse III Paul Sabatier,</p> <p>Grosclaude, Pascale; INSERM UMR_S 1027; Institute Claudius Regaud</p> |
| <b>Primary Subject Heading</b>: | Public health                                                                                                                                                                                                                                                                                                                                                                                                                                                                                                                                                                                                                                                                             |
| Secondary Subject Heading:      | Obstetrics and gynaecology, Sociology, Health policy, Epidemiology                                                                                                                                                                                                                                                                                                                                                                                                                                                                                                                                                                                                                        |
| Keywords:                       | Gynaecological oncology < GYNAECOLOGY, GENERAL MEDICINE (see Internal Medicine), Health policy < HEALTH SERVICES ADMINISTRATION & MANAGEMENT, Organisation of health services < HEALTH SERVICES ADMINISTRATION & MANAGEMENT, SOCIAL MEDICINE, PREVENTIVE MEDICINE                                                                                                                                                                                                                                                                                                                                                                                                                         |
|                                 |                                                                                                                                                                                                                                                                                                                                                                                                                                                                                                                                                                                                                                                                                           |

SCHOLARONE™  
Manuscripts



I, the Submitting Author has the right to grant and does grant on behalf of all authors of the Work (as defined in the below author licence), an exclusive licence and/or a non-exclusive licence for contributions from authors who are: i) UK Crown employees; ii) where BMJ has agreed a CC-BY licence shall apply, and/or iii) in accordance with the terms applicable for US Federal Government officers or employees acting as part of their official duties; on a worldwide, perpetual, irrevocable, royalty-free basis to BMJ Publishing Group Ltd ("BMJ") its licensees and where the relevant Journal is co-owned by BMJ to the co-owners of the Journal, to publish the Work in this journal and any other BMJ products and to exploit all rights, as set out in our [licence](#).

The Submitting Author accepts and understands that any supply made under these terms is made by BMJ to the Submitting Author unless you are acting as an employee on behalf of your employer or a postgraduate student of an affiliated institution which is paying any applicable article publishing charge ("APC") for Open Access articles. Where the Submitting Author wishes to make the Work available on an Open Access basis (and intends to pay the relevant APC), the terms of reuse of such Open Access shall be governed by a Creative Commons licence – details of these licences and which [Creative Commons](#) licence will apply to this Work are set out in our licence referred to above.

Other than as permitted in any relevant BMJ Author's Self Archiving Policies, I confirm this Work has not been accepted for publication elsewhere, is not being considered for publication elsewhere and does not duplicate material already published. I confirm all authors consent to publication of this Work and authorise the granting of this licence.

1  
2  
3 Title: Social and territorial inequalities in gynaecological cancers screening uptake: a cross-  
4 sectional study in France  
5  
6  
7  
8

9 Authors: Lisa Ouahnnon<sup>1,2</sup>, Marie-Eve Rouge Bugat<sup>1,2</sup>, Sébastien Lamy<sup>2,4</sup> Vladimir Druel<sup>1,2</sup>,  
10 Cyrille Delpierre<sup>2,3,\*</sup>, Pascale Grosclaude<sup>2,3,4,\*</sup>  
11  
12  
13

14  
15  
16 Authors affiliations:  
17

18 <sup>1</sup> DUMG (Département Universitaire de Médecine Générale), Université Toulouse 3 Paul  
19 Sabatier, France  
20

21  
22 <sup>2</sup> CERPOP, Université de Toulouse, Inserm, UPS, Toulouse, France  
23

24  
25 <sup>3</sup> Equipe Labellisée Ligue Contre le Cancer  
26

27 <sup>4</sup> Institut Claudius Regaud, IUCT-O, Registre des cancers du Tarn, Toulouse, France  
28

29  
30 \* these two authors have equally supervised the work  
31

32 The research team is supported by the French association “La Ligue contre le cancer”.  
33  
34  
35

36  
37 Corresponding author: Lisa Ouahnnon, 87 rue du Faubourg Bonnefoy 31500 Toulouse,  
38 France, lisa.ouahnnon@gmail.com, +33661594978  
39  
40  
41

42  
43 Word counts of the main text: 3176 and abstract: 287 words  
44

45  
46 Number of tables, figures and appendixes: 3 tables, 2 figures and 6 appendixes (2 tables A, 4  
47 tables B)  
48  
49  
50  
51  
52  
53  
54  
55  
56  
57  
58  
59  
60

## Abstract

**Objective** The objective of this cross-sectional study was to investigate the impact of socio-territorial characteristics on mammography and pap smear uptake according to the place of residence in the recommended age groups, and secondly outside the recommended age groups.

**Setting and participants** We used an existing dataset of 1,027,039 women which combines data from the Health Insurance information systems, with census data from Midi-Pyrénées, France.

**Primary and secondary outcome measures** Our outcome was, for each woman, the uptake of the pap smear and the uptake of the mammography during the year.

**Results** A social gradient of screening uptake was found in the recommended age groups. This gradient was stronger in large urban areas:

- For mammography: decile 10 [the most deprived] vs 1 [the least deprived], adjusted OR= 0.777, 95%CI [0.748,0.808] in large urban area; adjusted OR= 0.808 for decile 1 to 0.726 for decile 10 in other areas vs decile 1 in urban areas ;
- For pap smear: decile 10 vs 1 adjusted OR= 0.66, 95%CI [0.642,0.679] in large urban areas; adjusted OR= 0.747 for decile 1 to 0.562 for decile 10 in other areas vs decile 1 in urban areas).

Screening rates were globally higher in large urban areas.

For mammography, the social and territorial disparities were higher outside the recommended age group.

**Conclusions** Offering a universal approach to every woman, as it is often the case in nationally organised screening programmes, is likely to be insufficient to ensure real equity in access. Developing global dataset combining health data and diverse socioeconomic data, at individual and contextual levels, could enable a better understanding of the mechanisms involved in this

1  
2  
3 social gradient, and therefore the development of targeted territorial actions to improve equity  
4  
5 of access to healthcare.  
6  
7  
8  
9  
10  
11  
12  
13

#### 14 Keywords

15  
16  
17 Breast cancer screening; Cervical cancer screening; Screening programme participation;  
18  
19 Women health; Socioeconomic inequalities; Geographic inequalities; Deprivation index.  
20  
21

#### 22 Strengths and limitations of this study

- 23  
24  
25
- 26 • The use of health insurance data, merged with socio-territorial information, allowed for  
27 a very powerful and comprehensive study on social inequalities in health (database of  
28 2.5 million of individuals or 88% of the region's total population ).  
29  
30
  - 31 • We used both individual and contextual variables to investigate the link between an  
32 ecological deprivation index and breast and cervical cancers screening.  
33  
34
  - 35 • We performed a sequential regression (variables were successively added in the  
36 multivariable model) to investigate the role of each variable in the link between the  
37 ecological deprivation index and screening and studied the interaction between EDI and  
38 the type of place of residence  
39  
40  
41  
42  
43  
44
  - 45 • Our data covered only 1 year and we had a limited number of individual and contextual  
46 variables in our dataset.  
47  
48  
49  
50  
51  
52  
53  
54  
55  
56  
57  
58  
59  
60

1  
2  
3 Abbreviations:  
4

5  
6 CMU-C: Couverture Médicale Universelle-Complémentaire (Supplementary Universal  
7  
8 Healthcare Coverage)  
9

10  
11 EDI: European deprivation Index  
12

13  
14 GP: General Practitioner  
15

16  
17 INSEE: Institut National de la Statistique et des Etudes Economiques (French National  
18  
19 Institute of Statistics and Economic Studies)  
20

21  
22 IRIS: Ilots Regroupés pour l'Information statistique (aggregated units for statistical  
23  
24 information)  
25

26  
27 OR: Odds-Ratio  
28

29  
30 PLA: Potential Localised Accessibility  
31

32  
33 SEP: Socioeconomic Position  
34  
35  
36  
37  
38  
39  
40  
41  
42  
43  
44  
45  
46  
47  
48  
49  
50  
51  
52  
53  
54  
55  
56  
57  
58  
59  
60



## 1. Introduction

Breast and cervical cancers are the two most frequent cancers in women worldwide. They kill more than 600,000 and 300,000 women, respectively, every year (1).

For breast cancer in France, through the nationally organised screening programme, all women between 50 and 74 years old are offered a mammography every 2 years (2). For cervical cancer, a national screening programme is progressively being implemented (3). Before 2018, guidelines recommended a pap smear every 3 years between 25 and 65 years old.

In France, the participation rate is around 50% for breast cancer screening and 60% for cervical cancer (4). Despite an universal health coverage policy, mammography and pap smear uptake, and therefore breast and cervical cancer survival, vary considerably with factors like socioeconomic position (SEP) and place of residence (5–8). This raises the question of the determinants of universal access, in particular physical accessibility (availability, reasonable reach), financial affordability (healthcare cost, transportation, time away from work) and sociocultural accessibility (perceived effectiveness, social and cultural factors) (9,10). All these dimensions may be socially distributed and partly explain the inequalities of screening uptake.

Disentangling underlying mechanisms leading to these inequalities is a first step to address them. However, further studies on this topic have been made difficult by the lack of large and representative dataset combining socioeconomic, territorial, and healthcare data (11).

We used French healthcare insurance reimbursement data, merged with socio-territorial information, to assess and investigate the influence of deprivation on mammography and pap smear uptake, according to the place of residence, in the recommended age groups, and secondly outside the recommended age groups. To this end, we investigated the role of variables indicating financial precarity, healthcare accessibility, and adherence to the healthcare system.

## 2. Methods

### *Study design*

We used a dataset combining data from health insurance information systems with census data, based on the address of residence. This dataset has been described in detail elsewhere (12).

The health data was prospectively collected by the three main health insurance providers for 2012.

### *Population*

This dataset included individuals who were beneficiaries of any of the three health insurance providers on the 31<sup>st</sup> of December 2012 in Midi-Pyrénées. The individuals with an incomplete address or with differences in the management of their data were excluded. We obtained a base of 2,574,310 subjects (88% of the region's total population).

For this study, we focused on women over 20 years old (1,027,039 women), as cancers screening is rarely offered to women below that age.

### *Patient and public involvement*

Patients or the public were not involved in the design of our study.

### *Collected variables*

#### - Main outcomes

Our outcome was, for each woman, the uptake of the pap smear and the uptake of the mammography. It was categorised as a binary variable for each screening test to discriminate the women who had at least one mammography/pap smear during the year, and the other ones. Regarding mammography, we only included screening exams, but we could not differentiate between opportunistic and organised screening.

1  
2  
3  
4  
5 - Main explanatory variables  
6  
7

8 In the absence of individual social data, social condition of the participants was approached by  
9  
10 an ecological deprivation index, the European Deprivation Index (13). The EDI approaches  
11  
12 SEP by measuring social deprivation as defined by Townsend as “a state of observable and  
13  
14 demonstrable disadvantage relative to the local community or the wider society to which an  
15  
16 individual, family or group belongs”. To calculate the EDI, we used the aggregated unit for  
17  
18 statistical information (‘IRIS’) corresponding to the person’s address. IRIS is the smallest  
19  
20 geographical unit for which statistics are available in France, which represents about 2,000  
21  
22 inhabitants. Each IRIS was assigned an EDI value, calculated with census data. We used an  
23  
24 EDI presentation in deciles, calculated from all the IRISs of the region: decile 1 corresponds to  
25  
26 the least deprived zones, decile 10 to the most deprived zones.  
27  
28  
29  
30  
31  
32

33 - Covariates  
34

35 We considered age as a potential confounder. As the association between this variable and the  
36  
37 outcomes clearly appeared non-linear, we categorised it (into 5-year groups).  
38  
39

40 As an ecological index of deprivation, EDI is assumed to be capturing both intrinsic properties  
41  
42 of the individuals in the area and contextual properties of the area (14). To explore the  
43  
44 mechanisms involved in the link between EDI and screening uptake, we chose to study various  
45  
46 factors, including one individual and one contextual:  
47  
48  
49

- 50  
51 - The Supplementary Universal Healthcare Coverage (CMU-C), is offered to individuals  
52  
53 who earn less than a defined income threshold, to pay for their healthcare expenses. This  
54  
55 characteristic was used as a proxy for individual financial precarity. Our hypothesis was  
56  
57 that financial precarity, by limiting financial accessibility, was key in the link between  
58  
59 deprivation and screening participation.  
60

- 1  
2  
3 - Healthcare supply is a contextual property influencing deprivation. We assumed that  
4 this factor could partly explain the link between EDI and screening uptake by measuring  
5 physical accessibility. Healthcare supply at IRIS level was approached by the Potential  
6 Localised Accessibility (PLA) to the GP. The PLA calculates the distance-weighted  
7 supply and the local demand, measured by the age-differentiated rate of access. It is  
8 interpreted as a medical density (number of full-time equivalents for 100 000  
9 inhabitants) (15).

10  
11 We assumed that the overall healthcare system adherence could also explain part of the  
12 association between deprivation and screening uptake. Therefore, we used a binary variable  
13 that discriminates between the patients who had no designated referring physician (in most  
14 cases a General Practitioner (GP)) and the ones who had one. This health-seeking behaviour is  
15 a property of individuals but is likely to be influenced by both individual and contextual factors  
16 (16).

17  
18 Healthcare supply and transport facilities are very different in rural and urban areas (17–19).  
19 We assumed that the level of urbanisation of the place of residence could modify the social  
20 gradient of screening uptake. Based on the French National Institute of Statistics and Economic  
21 Studies (INSEE)'s 2010 zoning in urban areas, we built a variable to distinguish the large urban  
22 centres (more than 10 000 jobs) and their suburbs (urban units in which at least 40% of the  
23 active residents work in the urban centre or in the towns attracted by it) (20), from the rest of  
24 the region. In the descriptive analysis, we differentiated among large urban areas between  
25 Toulouse metropolis, the regional capital which covers almost a quarter of the region's  
26 population, and the other areas.

27  
28 Our conceptual model showing how these variables interact is presented in Figure 1.  
29  
30  
31  
32  
33  
34  
35  
36  
37  
38  
39  
40  
41  
42  
43  
44  
45  
46  
47  
48  
49  
50  
51  
52  
53  
54  
55  
56  
57  
58  
59  
60

### *Statistical analysis*

To describe the sample, we performed univariate analyses: we tested the association between the main explanatory variable and the outcomes, between each covariate and the outcomes, and between each covariate and the EDI.

We used a multivariable logistic regression model to analyse the association between EDI and the mammography and pap smear uptake, adjusted for all the previously identified confounders and intermediate variables. We performed a sequential regression. The variables were successively added to the model following a pre-defined order: the main explanatory variable alone first, then the confounder, and lastly the intermediate variables (at an individual then at a contextual level).

We studied the interaction between EDI and the type of place of residence (large urban/other areas) in the model through a new variable: a 20-modal indicator with ten modalities (corresponding to the EDI deciles) per type of geographical area.

We undertook some age groups analyses to study women outside the recommended age groups (younger and older). For younger women, we focused on women aged 20 to 25 for pap smear and 40 to 50 for mammography. Our hypothesis was that social and territorial inequalities were higher for women outside the recommended age groups.

Since we used data that are systematically recorded by health insurance providers, we expected very little missing data. This was therefore negligible in light of the global sample size (around 0.01%): a complete case analysis could be used.

Statistical analyses were performed with R software (R x64 3.0.2) (21).

### 3. Results

Selected population in the recommended age groups for mammography (50-74 years old) and pap smear (25-65 years old), were composed of 365 947 and 711 803 women respectively

1  
2  
3 (Table 1). Among these women, 31% had had at least one mammography during the year, and  
4  
5 29% at least one pap smear. Almost two thirds of the population lived in large urban areas. A  
6  
7 major part of the most disadvantaged women lived in the Toulouse metropolis (Supplementary  
8  
9 material Appendix 1, Tables A). Around 8% of the 25-65 women and less than 4% of the 50-  
10  
11 74 had the CMU-C. 92% of the 25-65 women and 95% of the 50-74 had a designated referring  
12  
13 physician.  
14  
15

16  
17 The more deprived the area of residence, the lower the breast and cervical cancers screening  
18  
19 uptakes ( $p$ -value  $< 0.001$ ) (Table 1). Regarding age, the mammography rate seemed rather  
20  
21 constant throughout the recommended ages. Pap smear uptake decreased a lot after 55 years  
22  
23 old (from 31% to 23% between the 45-50 and the 55–60-year-old groups). Women with CMU-  
24  
25 C had a lower screening uptake rate. We noticed a slight territorial gradient: the higher the GP  
26  
27 density, the higher the mammography and pap smear uptake, except for the last two deciles.  
28  
29 The women living in large urban areas had a higher screening rate than the ones living in the  
30  
31 rest of the region. Women who had a designated referring physician had a higher screening rate  
32  
33 (32% vs 5% for mammography, 31% vs 8% for pap smear,  $p$ -value  $< 0.001$ ).  
34  
35  
36  
37  
38

39 Adding the interaction term between EDI and the type of place of residence (large urban/other  
40  
41 areas) improved our models (better likelihood,  $p$ -value= 0.0048 for mammography uptake and  
42  
43 0.0040 for pap smear uptake). Tables 2 and 3 present the logistic regression of mammography  
44  
45 and pap smear uptake in the recommended age groups: first the odds-ratios associated with the  
46  
47 variable combining EDI and the type of place of residence (large urban/other areas), then the  
48  
49 result of the sequential adjustments, and lastly the final multivariable regression model.  
50  
51

52 For mammography (Table 2), an effect of EDI on mammography uptake was observed, through  
53  
54 a social gradient: the screening uptake regularly decreased with increasing deprivation. This  
55  
56 social gradient was mostly observed in large urban areas (decile 10 vs 1 adjusted OR= 0.777,  
57  
58 95%CI [0.748,0.808]). The social gradient was less strong in the other areas, where  
59  
60

1  
2  
3 mammography rate was globally lower than in urban areas. Influence of financial precarity was  
4 corroborated by CMU-C impact on screening uptake (adjusted OR= 0.644, 95%CI [0.618;  
5 0.671]). The territorial gradient based on GP accessibility was confirmed. Adding this variable  
6 decreased only slightly the difference between large urban and other areas. The link between  
7 mammography and having a designated referring physician was confirmed as well (adjusted  
8 OR = 8.45, 95%CI [7.946; 8.996]). Age had a very limited effect on mammography uptake.  
9  
10 Sequential inclusion of all these variables in the model modified only slightly the link between  
11 EDI and screening uptake.  
12  
13  
14  
15  
16  
17  
18  
19  
20  
21  
22  
23

24 For pap smear (Table 3), a strong social gradient was observed. This gradient was slightly  
25 stronger in large urban areas (decile 10 vs 1 adjusted OR= 0.66, 95%CI [0.642,0.679]) than in  
26 the rest of the region (adjusted OR= 0.747 for decile 1 to 0.562 for decile 10 in other areas vs  
27 decile 1 in urban areas). Influence of financial precarity was corroborated by CMU-C impact  
28 on screening uptake (adjusted OR= 0.669). The territorial gradient (based on GP accessibility)  
29 was confirmed but, as for mammography, adding this variable decreased only slightly the  
30 difference between large urban and other areas. The multivariable analysis confirmed the  
31 association between having a designated referring physician and pap smear uptake (adjusted  
32 OR = 5.39 95%CI [5.227; 5.557]). An effect of age on pap smear uptake was also found  
33 (adjusted OR= 0.59, 95% CI [0.574; 0.601] for 55-60 year-old women vs 25-30 women).  
34  
35 Sequential inclusion of all these variables in the model modified only slightly the link between  
36 EDI and screening uptake.  
37  
38  
39  
40  
41  
42  
43  
44  
45  
46  
47  
48  
49  
50  
51

52 We used the same approach for women outside the recommended age groups (Figure 2 &  
53 supplementary material Appendix 2, Tables B). Among younger women (40-50 years old for  
54 mammography and 20-25 for pap smear), both mammography and pap smear uptakes in the  
55 year were around 21%. Among women older than the recommended age, participation rates  
56  
57  
58  
59  
60

1  
2  
3 were around 6% for both breast and cervical cancers. Figure 2 shows that the social gradient in  
4  
5 mammography uptake was substantially stronger in women between the ages of 40 and 50, and  
6  
7 more so in large urban areas. For pap smear uptake, social gradient seemed less strong in  
8  
9 younger women. Regarding GP accessibility, we observed a stronger territorial gradient for  
10  
11 older women, for both screening uptakes.  
12  
13  
14  
15  
16  
17  
18  
19  
20  
21  
22  
23  
24  
25  
26  
27  
28  
29  
30  
31  
32  
33  
34  
35  
36  
37  
38  
39  
40  
41  
42  
43  
44  
45  
46  
47  
48  
49  
50  
51  
52  
53  
54  
55  
56  
57  
58  
59  
60

For peer review only



|                       | <b>Total<br/>50-74 y.o<br/>N=365 947<br/>N (%)</b> | <b>No<br/>mammography<br/>n (%)<br/>n= 253 354<br/>(69.23)</b> | <b>≥ 1 mammography<br/>n (%)<br/>n= 112 593<br/>(30.77)</b> | <b>Total<br/>25-65 y.o<br/>N=711 803<br/>N (%)</b> | <b>No pap smear<br/>n (%)<br/>n= 506 731<br/>(71.19)</b> | <b>≥ 1 pap smear<br/>n (%)<br/>n= 205 072<br/>(28.81)</b> |
|-----------------------|----------------------------------------------------|----------------------------------------------------------------|-------------------------------------------------------------|----------------------------------------------------|----------------------------------------------------------|-----------------------------------------------------------|
| <b>EDI</b>            |                                                    |                                                                |                                                             |                                                    |                                                          |                                                           |
| 1 (best)              | 31201 (8.53)                                       | 20675 (66.26)                                                  | 10526 (33.74)                                               | 62238 (8.74)                                       | 40787 (65.53)                                            | 21451 (34.47)                                             |
| 2                     | 34826 (9.52)                                       | 23263 (66.8)                                                   | 11563 (33.2)                                                | 70952 (9.97)                                       | 47640 (67.14)                                            | 23312 (32.86)                                             |
| 3                     | 30111 (8.23)                                       | 20414 (67.8)                                                   | 9697 (32.2)                                                 | 60763 (8.54)                                       | 41703 (68.63)                                            | 19060 (31.37)                                             |
| 4                     | 31564 (8.63)                                       | 21596 (68.42)                                                  | 9968 (31.58)                                                | 60572 (8.51)                                       | 42269 (69.78)                                            | 18303 (30.22)                                             |
| 5                     | 32733 (8.94)                                       | 22750 (69.5)                                                   | 9983 (30.5)                                                 | 65031 (9.14)                                       | 46072 (70.85)                                            | 18959 (29.15)                                             |
| 6                     | 39518 (10.8)                                       | 27130 (68.65)                                                  | 12388 (31.35)                                               | 73464 (10.32)                                      | 53153 (72.35)                                            | 20311 (27.65)                                             |
| 7                     | 38825 (10.61)                                      | 27107 (69.82)                                                  | 11718 (30.18)                                               | 72276 (10.15)                                      | 52119 (72.11)                                            | 20157 (27.89)                                             |
| 8                     | 37868 (10.35)                                      | 26309 (69.48)                                                  | 11559 (30.52)                                               | 70412 (9.89)                                       | 51084 (72.55)                                            | 19328 (27.45)                                             |
| 9                     | 42390 (11.58)                                      | 29998 (70.77)                                                  | 12392 (29.23)                                               | 82232 (11.55)                                      | 60646 (73.75)                                            | 21586 (26.25)                                             |
| 10 (worst)            | 46911 (12.82)                                      | 34112 (72.72)                                                  | 12799 (27.28)                                               | 93863 (13.19)                                      | 71258 (75.92)                                            | 22605 (24.08)                                             |
| <b>Age (/5years)</b>  |                                                    |                                                                |                                                             |                                                    |                                                          |                                                           |
| 25-30 y.o.            | -                                                  | -                                                              | -                                                           | 82413 (11.58)                                      | 56617 (68.7)                                             | 25796 (31.3)                                              |
| 30-35 y.o.            | -                                                  | -                                                              | -                                                           | 88249 (12.4)                                       | 58932 (66.78)                                            | 29317 (33.22)                                             |
| 35-40 y.o.            | -                                                  | -                                                              | -                                                           | 85200 (11.97)                                      | 57150 (67.08)                                            | 28050 (32.92)                                             |
| 40-45 y.o.            | -                                                  | -                                                              | -                                                           | 92964 (13.06)                                      | 63042 (67.81)                                            | 29922 (32.19)                                             |
| 45-50 y.o.            | -                                                  | -                                                              | -                                                           | 94291 (13.25)                                      | 64872 (68.8)                                             | 29419 (31.2)                                              |
| 50-55 y.o.            | 88241 (24.11)                                      | 61449 (69.64)                                                  | 26792 (30.36)                                               | 88241 (12.4)                                       | 64145 (72.69)                                            | 24096 (27.31)                                             |
| 55-60 y.o.            | 83126 (22.72)                                      | 57836 (69.58)                                                  | 25290 (30.42)                                               | 83126 (11.68)                                      | 64120 (77.14)                                            | 19006 (22.86)                                             |
| 60-65 y.o.            | 81209 (22.19)                                      | 55168 (67.93)                                                  | 26041 (32.07)                                               | 81209 (11.41)                                      | 64544 (79.48)                                            | 16665 (20.52)                                             |
| 65-70 y.o.            | 64794 (17.71)                                      | 44289 (68.35)                                                  | 20505 (31.65)                                               | 16110 (2.26) <sup>1</sup>                          | 13309 (82.61)                                            | 2801 (17.39)                                              |
| 70-75 y.o.            | 48577 (13.27)                                      | 34612 (71.25)                                                  | 13965 (28.75)                                               | -                                                  | -                                                        | -                                                         |
| <b>CMU-C</b>          |                                                    |                                                                |                                                             |                                                    |                                                          |                                                           |
| No CMU-C              | 351872 (96.15)                                     | 242406 (68.89)                                                 | 109466 (31.11)                                              | 655969 (92.16)                                     | 463517 (70.66)                                           | 192452 (29.34)                                            |
| CMU-C                 | 14075 (3.85)                                       | 10948 (77.78)                                                  | 3127 (22.22)                                                | 55834 (7.84)                                       | 43214 (77.4)                                             | 12620 (22.6)                                              |
| <b>GP PLA</b>         |                                                    |                                                                |                                                             |                                                    |                                                          |                                                           |
| 1 (worst)             | 11427 (3.12)                                       | 8212 (71.86)                                                   | 3215 (28.14)                                                | 18607 (2.61)                                       | 13784 (74.08)                                            | 4823 (25.92)                                              |
| 2                     | 13767 (3.76)                                       | 9738 (70.73)                                                   | 4029 (29.27)                                                | 24385 (3.43)                                       | 17816 (73.06)                                            | 6569 (26.94)                                              |
| 3                     | 14455 (3.95)                                       | 10195 (70.53)                                                  | 4260 (29.47)                                                | 26121 (3.67)                                       | 18888 (72.31)                                            | 7233 (27.69)                                              |
| 4                     | 20582 (5.62)                                       | 14258 (69.27)                                                  | 6324 (30.73)                                                | 37307 (5.24)                                       | 26610 (71.33)                                            | 10697 (28.67)                                             |
| 5                     | 26405 (7.22)                                       | 18029 (68.28)                                                  | 8376 (31.72)                                                | 49815 (7)                                          | 35139 (70.54)                                            | 14676 (29.46)                                             |
| 6                     | 32262 (8.82)                                       | 21930 (67.97)                                                  | 10332 (32.03)                                               | 63615 (8.94)                                       | 44311 (69.65)                                            | 19304 (30.35)                                             |
| 7                     | 50863 (13.9)                                       | 34371 (67.58)                                                  | 16492 (32.42)                                               | 98949 (13.9)                                       | 68782 (69.51)                                            | 30167 (30.49)                                             |
| 8                     | 62331 (17.03)                                      | 42592 (68.33)                                                  | 19739 (31.67)                                               | 123460 (17.34)                                     | 86465 (70.03)                                            | 36995 (29.97)                                             |
| 9                     | 64131 (17.52)                                      | 44615 (69.57)                                                  | 19516 (30.43)                                               | 127253 (17.88)                                     | 90793 (71.35)                                            | 36460 (28.65)                                             |
| 10 (best)             | 69724 (19.05)                                      | 49414 (70.87)                                                  | 20310 (29.13)                                               | 142291 (19.99)                                     | 104143 (73.19)                                           | 38148 (26.81)                                             |
| <b>Urbanisation</b>   |                                                    |                                                                |                                                             |                                                    |                                                          |                                                           |
| Toulouse              | 72919 (19.93)                                      | 49978 (68.54)                                                  | 22941 (31.46)                                               | 180030 (25.59)                                     | 123038 (68.34)                                           | 56992 (31.66)                                             |
| Large urban areas     | 150755 (41.2)                                      | 102663 (68.1)                                                  | 48092 (31.9)                                                | 302563 (42.51)                                     | 211072 (69.76)                                           | 91491 (30.24)                                             |
| Other areas           | 142273 (38.88)                                     | 100713 (70.79)                                                 | 41560 (29.21)                                               | 229210 (32.2)                                      | 172621 (75.31)                                           | 56589 (24.69)                                             |
| <b>RP<sup>2</sup></b> |                                                    |                                                                |                                                             |                                                    |                                                          |                                                           |
| No                    | 20032 (5.47)                                       | 18963 (94.66)                                                  | 1069 (5.34)                                                 | 57596 (8.09)                                       | 52948 (91.93)                                            | 4648 (8.07)                                               |
| Yes                   | 345915 (94.53)                                     | 234391 (67.76)                                                 | 111524 (32.24)                                              | 654207 (91.91)                                     | 453783 (69.36)                                           | 200424 (30.64)                                            |

**Table1: Socio-demographic characteristics of women**

<sup>1</sup> Only 65 y.o. women

<sup>2</sup> RP : Designated referring physician

\*: p-value <0.001

**Table 2: Mammography uptake in recommended age group: multivariable logistic regression models (mammography uptake = 30.77%)**

|                                                 |                    | N           | Model 1             | LogLik  | Model 2              | LogLik  | Model 3              | LogLik  | Model 4              | LogLik  | Model 5              | LogLik  |
|-------------------------------------------------|--------------------|-------------|---------------------|---------|----------------------|---------|----------------------|---------|----------------------|---------|----------------------|---------|
|                                                 |                    | Tot= 365947 | OR (95%CI)          | -225465 | OR (95%CI)           | -225373 | OR (95%CI)           | -225160 | OR (95%CI)           | -225115 | OR (95%CI)           | -220891 |
| <b>Combined EDI and large urban/other areas</b> | 1 <sup>3</sup>     | 2 719       | 1                   |         | 1                    |         | 1                    |         | 1                    |         | 1                    |         |
|                                                 | 2                  | 5 896       | 0.981 (0.948,1.016) |         | 0.982 (0.948,1.016)  |         | 0.983 (0.95,1.018)   |         | 0.983 (0.949,1.018)  |         | 0.976 (0.942,1.011)  |         |
|                                                 | 3                  | 10 112      | 0.967 (0.931,1.005) |         | 0.968 (0.932,1.006)  |         | 0.971 (0.934,1.009)  |         | 0.968 (0.932,1.007)  |         | 0.962 (0.925,1)      |         |
|                                                 | 4                  | 13 232      | 0.933 (0.897,0.97)  |         | 0.934 (0.898,0.971)  |         | 0.939 (0.902,0.976)  |         | 0.934 (0.897,0.971)  |         | 0.927 (0.891,0.965)  |         |
|                                                 | 5                  | 12 730      | 0.889 (0.856,0.924) |         | 0.89 (0.857,0.925)   |         | 0.897 (0.863,0.933)  |         | 0.9 (0.865,0.936)    |         | 0.897 (0.862,0.933)  |         |
|                                                 | 6                  | 19 906      | 0.928 (0.893,0.965) |         | 0.929 (0.894,0.966)  |         | 0.936 (0.901,0.973)  |         | 0.932 (0.896,0.969)  |         | 0.927 (0.891,0.964)  |         |
| EDI (deciles) in large urban areas              | 7                  | 20 092      | 0.849 (0.816,0.883) |         | 0.85 (0.817,0.884)   |         | 0.858 (0.825,0.892)  |         | 0.861 (0.826,0.896)  |         | 0.864 (0.83,0.9)     |         |
|                                                 | 8                  | 20 741      | 0.872 (0.837,0.908) |         | 0.873 (0.838,0.909)  |         | 0.885 (0.85,0.922)   |         | 0.893 (0.857,0.931)  |         | 0.895 (0.858,0.933)  |         |
|                                                 | 9                  | 20 679      | 0.838 (0.807,0.871) |         | 0.84 (0.809,0.872)   |         | 0.855 (0.823,0.888)  |         | 0.86 (0.827,0.895)   |         | 0.867 (0.833,0.903)  |         |
|                                                 | 10                 | 16 166      | 0.733 (0.708,0.759) |         | 0.734 (0.709,0.76)   |         | 0.763 (0.737,0.79)   |         | 0.771 (0.742,0.801)  |         | 0.777 (0.748,0.808)  |         |
|                                                 | 1                  | 28 482      | 0.782 (0.718,0.853) |         | 0.783 (0.718,0.854)  |         | 0.784 (0.719,0.855)  |         | 0.811 (0.743,0.884)  |         | 0.808 (0.74,0.882)   |         |
|                                                 | 2                  | 28 930      | 0.841 (0.791,0.893) |         | 0.842 (0.792,0.894)  |         | 0.845 (0.795,0.897)  |         | 0.861 (0.81,0.915)   |         | 0.855 (0.804,0.91)   |         |
|                                                 | 3                  | 19 999      | 0.814 (0.775,0.855) |         | 0.814 (0.775,0.855)  |         | 0.817 (0.778,0.858)  |         | 0.838 (0.798,0.881)  |         | 0.834 (0.793,0.877)  |         |
| EDI (deciles) in other areas                    | 4                  | 18 332      | 0.829 (0.793,0.866) |         | 0.829 (0.793,0.867)  |         | 0.833 (0.797,0.871)  |         | 0.845 (0.808,0.883)  |         | 0.84 (0.803,0.879)   |         |
|                                                 | 5                  | 20 003      | 0.777 (0.742,0.813) |         | 0.777 (0.742,0.813)  |         | 0.78 (0.746,0.817)   |         | 0.797 (0.761,0.835)  |         | 0.794 (0.758,0.832)  |         |
|                                                 | 6                  | 19 612      | 0.831 (0.799,0.864) |         | 0.832 (0.801,0.866)  |         | 0.838 (0.805,0.871)  |         | 0.847 (0.815,0.881)  |         | 0.846 (0.813,0.881)  |         |
|                                                 | 7                  | 18 733      | 0.816 (0.785,0.848) |         | 0.817 (0.786,0.85)   |         | 0.824 (0.792,0.857)  |         | 0.834 (0.801,0.867)  |         | 0.829 (0.797,0.863)  |         |
|                                                 | 8                  | 17 127      | 0.824 (0.793,0.857) |         | 0.825 (0.794,0.858)  |         | 0.833 (0.802,0.866)  |         | 0.846 (0.813,0.88)   |         | 0.842 (0.809,0.876)  |         |
|                                                 | 9                  | 21 711      | 0.751 (0.722,0.78)  |         | 0.751 (0.722,0.781)  |         | 0.762 (0.733,0.792)  |         | 0.767 (0.737,0.798)  |         | 0.767 (0.737,0.799)  |         |
|                                                 | 10                 | 30 745      | 0.702 (0.672,0.732) |         | 0.703 (0.674,0.734)  |         | 0.718 (0.688,0.75)   |         | 0.729 (0.698,0.762)  |         | 0.726 (0.694,0.759)  |         |
| <b>Age (y.o)</b>                                | 50-55 <sup>3</sup> | 88 241      |                     |         | 1                    |         | 1                    |         | 1                    |         | 1                    |         |
|                                                 | 55-60              | 83 126      |                     |         | 1.006 (0.985; 1.027) |         | 1.002 (0.982; 1.023) |         | 1.002 (0.982; 1.023) |         | 0.997 (0.977; 1.018) |         |
|                                                 | 60-65              | 81 209      |                     |         | 1.088 (1.066; 1.111) |         | 1.077 (1.055; 1.099) |         | 1.077 (1.055; 1.1)   |         | 1.066 (1.044; 1.088) |         |
|                                                 | 65-70              | 64 794      |                     |         | 1.07 (1.047; 1.094)  |         | 1.052 (1.029; 1.076) |         | 1.052 (1.029; 1.076) |         | 1.035 (1.012; 1.058) |         |
|                                                 | 70-75              | 48 577      |                     |         | 0.938 (0.916; 0.961) |         | 0.919 (0.897; 0.942) |         | 0.919 (0.897; 0.942) |         | 0.897 (0.875; 0.919) |         |
| <b>CMU-C</b>                                    | No <sup>3</sup>    | 351 872     |                     |         |                      |         | 1                    |         | 1                    |         | 1                    |         |
|                                                 | Yes                | 14 075      |                     |         |                      |         | 0.659 (0.633; 0.686) |         | 0.659 (0.633; 0.687) |         | 0.644 (0.618; 0.671) |         |
| <b>GP PLA</b>                                   | 1 <sup>3</sup>     | 11 427      |                     |         |                      |         |                      |         | 1                    |         | 1                    |         |
|                                                 | 2                  | 13 767      |                     |         |                      |         |                      |         | 1.023 (0.968; 1.081) |         | 1.013 (0.958; 1.072) |         |
|                                                 | 3                  | 14 455      |                     |         |                      |         |                      |         | 1.027 (0.972; 1.084) |         | 1.018 (0.964; 1.076) |         |
|                                                 | 4                  | 20 582      |                     |         |                      |         |                      |         | 1.068 (1.015; 1.124) |         | 1.054 (1.002; 1.11)  |         |
|                                                 | 5                  | 26 405      |                     |         |                      |         |                      |         | 1.111 (1.058; 1.167) |         | 1.102 (1.048; 1.158) |         |
|                                                 | 6                  | 32 262      |                     |         |                      |         |                      |         | 1.118 (1.066; 1.173) |         | 1.103 (1.051; 1.158) |         |
|                                                 | 7                  | 50 863      |                     |         |                      |         |                      |         | 1.14 (1.089; 1.194)  |         | 1.126 (1.075; 1.18)  |         |
|                                                 | 8                  | 6 2331      |                     |         |                      |         |                      |         | 1.143 (1.092; 1.195) |         | 1.126 (1.076; 1.179) |         |
|                                                 | 9                  | 64 131      |                     |         |                      |         |                      |         | 1.106 (1.057; 1.157) |         | 1.096 (1.047; 1.148) |         |
|                                                 | 10                 | 69 724      |                     |         |                      |         |                      |         | 1.081 (1.033; 1.132) |         | 1.081 (1.032; 1.132) |         |
| <b>Referring physician</b>                      | No <sup>3</sup>    | 20 032      |                     |         |                      |         |                      |         |                      |         | 1                    |         |
|                                                 | Yes                | 345 915     |                     |         |                      |         |                      |         |                      |         | 8.45 (7.946; 8.996)  |         |

<sup>3</sup> Reference category

1  
2  
3  
4  
5  
6  
7  
8  
9  
10  
11  
12  
13  
14  
15  
16  
17  
18  
19  
20  
21  
22  
23  
24  
25  
26  
27  
28  
29  
30  
31  
32  
33  
34  
35  
36  
37  
38  
39  
40  
41  
42  
43  
44  
45  
46

For peer review only

**Table 3: Pap smear uptake multivariable logistic regression models in recommended age group (Pap smear uptake = 28.81%)**

|                                        |                    | N             | Model 1<br>LogLik   | Model 2<br>LogLik    | Model 3<br>LogLik    | Model 4<br>LogLik    | Model 5<br>LogLik    |
|----------------------------------------|--------------------|---------------|---------------------|----------------------|----------------------|----------------------|----------------------|
|                                        |                    | Total= 711803 | OR (95%CI) -424737  | OR (95%CI) -420964   | OR (95%CI) -420368   | OR (95%CI) -420310   | OR (95%CI) -411557   |
| <b>Combined</b>                        | 1 <sup>4</sup>     | 4 741         | 1                   | 1                    | 1                    | 1                    | 1                    |
| <b>EDI and large urban/other areas</b> | 2                  | 9 906         | 0.945 (0.923,0.968) | 0.936 (0.914,0.959)  | 0.939 (0.917,0.962)  | 0.929 (0.907,0.952)  | 0.922 (0.899,0.945)  |
|                                        | 3                  | 16 889        | 0.918 (0.894,0.942) | 0.902 (0.879,0.927)  | 0.908 (0.884,0.932)  | 0.897 (0.873,0.921)  | 0.889 (0.865,0.913)  |
|                                        | 4                  | 21 643        | 0.887 (0.863,0.912) | 0.878 (0.854,0.902)  | 0.886 (0.862,0.91)   | 0.878 (0.854,0.903)  | 0.873 (0.849,0.898)  |
|                                        | 5                  | 20 561        | 0.833 (0.811,0.855) | 0.816 (0.795,0.838)  | 0.826 (0.804,0.848)  | 0.817 (0.795,0.839)  | 0.816 (0.794,0.839)  |
|                                        | 6                  | 31 816        | 0.793 (0.772,0.815) | 0.781 (0.76,0.803)   | 0.792 (0.771,0.814)  | 0.78 (0.759,0.802)   | 0.781 (0.759,0.803)  |
| EDI (deciles)                          | 7                  | 31 628        | 0.801 (0.78,0.823)  | 0.788 (0.766,0.81)   | 0.8 (0.778,0.822)    | 0.791 (0.769,0.813)  | 0.805 (0.782,0.828)  |
| in large urban area                    | 8                  | 32 394        | 0.806 (0.784,0.829) | 0.788 (0.766,0.81)   | 0.806 (0.783,0.828)  | 0.801 (0.778,0.824)  | 0.81 (0.787,0.834)   |
|                                        | 9                  | 33 163        | 0.735 (0.716,0.754) | 0.716 (0.698,0.735)  | 0.738 (0.719,0.758)  | 0.729 (0.709,0.749)  | 0.748 (0.727,0.769)  |
|                                        | 10                 | 26 469        | 0.616 (0.601,0.631) | 0.602 (0.588,0.618)  | 0.643 (0.627,0.659)  | 0.636 (0.619,0.653)  | 0.66 (0.642,0.679)   |
|                                        | 1                  | 57 497        | 0.723 (0.678,0.773) | 0.735 (0.688,0.785)  | 0.737 (0.69,0.787)   | 0.749 (0.701,0.801)  | 0.747 (0.699,0.799)  |
|                                        | 2                  | 61 046        | 0.703 (0.671,0.738) | 0.72 (0.686,0.755)   | 0.724 (0.69,0.759)   | 0.731 (0.697,0.767)  | 0.732 (0.697,0.768)  |
|                                        | 3                  | 43 874        | 0.685 (0.659,0.711) | 0.704 (0.677,0.731)  | 0.707 (0.681,0.735)  | 0.715 (0.688,0.744)  | 0.716 (0.689,0.745)  |
| EDI (deciles)                          | 4                  | 38929         | 0.667 (0.644,0.69)  | 0.684 (0.661,0.709)  | 0.69 (0.666,0.714)   | 0.693 (0.669,0.718)  | 0.693 (0.669,0.718)  |
| in other area                          | 5                  | 44470         | 0.628 (0.606,0.651) | 0.645 (0.623,0.669)  | 0.65 (0.627,0.674)   | 0.655 (0.631,0.679)  | 0.659 (0.635,0.683)  |
|                                        | 6                  | 41648         | 0.608 (0.59,0.627)  | 0.626 (0.607,0.645)  | 0.632 (0.613,0.652)  | 0.631 (0.611,0.651)  | 0.637 (0.617,0.657)  |
|                                        | 7                  | 40648         | 0.619 (0.6,0.638)   | 0.637 (0.618,0.657)  | 0.647 (0.628,0.668)  | 0.646 (0.626,0.666)  | 0.648 (0.628,0.669)  |
|                                        | 8                  | 38018         | 0.591 (0.574,0.61)  | 0.61 (0.591,0.629)   | 0.621 (0.602,0.641)  | 0.62 (0.601,0.64)    | 0.622 (0.603,0.642)  |
|                                        | 9                  | 49069         | 0.559 (0.542,0.577) | 0.573 (0.556,0.591)  | 0.588 (0.57,0.607)   | 0.582 (0.564,0.601)  | 0.59 (0.571,0.609)   |
|                                        | 10                 | 67394         | 0.524 (0.506,0.542) | 0.533 (0.516,0.552)  | 0.556 (0.537,0.575)  | 0.552 (0.533,0.572)  | 0.562 (0.542,0.582)  |
| <b>Age (y.o)</b>                       | 25-30 <sup>4</sup> | 82413         |                     | 1                    | 1                    | 1                    | 1                    |
|                                        | 30-35              | 88249         |                     | 1.084 (1.062; 1.106) | 1.08 (1.059; 1.103)  | 1.081 (1.059; 1.104) | 1.06 (1.038; 1.082)  |
|                                        | 35-40              | 85200         |                     | 1.063 (1.042; 1.085) | 1.056 (1.035; 1.078) | 1.057 (1.035; 1.079) | 1.021 (1; 1.043)     |
|                                        | 40-45              | 92964         |                     | 1.031 (1.01; 1.052)  | 1.021 (1; 1.042)     | 1.021 (1.001; 1.042) | 0.963 (0.944; 0.984) |
|                                        | 45-50              | 94291         |                     | 0.988 (0.968; 1.008) | 0.975 (0.955; 0.995) | 0.975 (0.956; 0.996) | 0.906 (0.888; 0.925) |
|                                        | 50-55              | 88241         |                     | 0.826 (0.809; 0.843) | 0.811 (0.794; 0.828) | 0.812 (0.795; 0.829) | 0.749 (0.733; 0.765) |
|                                        | 55-60              | 83126         |                     | 0.655 (0.64; 0.669)  | 0.641 (0.627; 0.655) | 0.641 (0.627; 0.656) | 0.587 (0.574; 0.601) |
|                                        | 60-65              | 81209         |                     | 0.573 (0.56; 0.586)  | 0.558 (0.545; 0.57)  | 0.558 (0.546; 0.571) | 0.507 (0.496; 0.519) |
|                                        | 65                 | 16110         |                     | 0.468 (0.448; 0.488) | 0.454 (0.434; 0.474) | 0.454 (0.435; 0.474) | 0.413 (0.395; 0.431) |
| <b>CMU-C</b>                           | No <sup>4</sup>    | 655969        |                     |                      | 1                    | 1                    | 1                    |
|                                        | Yes                | 55834         |                     |                      | 0.696 (0.681; 0.711) | 0.695 (0.681; 0.71)  | 0.669 (0.655; 0.684) |
| <b>GP PLA (deciles)</b>                | 1 <sup>4</sup>     | 18607         |                     |                      |                      | 1                    | 1                    |
|                                        | 2                  | 24385         |                     |                      |                      | 0.966 (0.925; 1.01)  | 0.951 (0.909; 0.994) |
|                                        | 3                  | 26121         |                     |                      |                      | 0.982 (0.941; 1.026) | 0.97 (0.928; 1.013)  |
|                                        | 4                  | 37307         |                     |                      |                      | 1.004 (0.965; 1.046) | 0.989 (0.95; 1.031)  |
|                                        | 5                  | 49815         |                     |                      |                      | 1.01 (0.971; 1.05)   | 0.991 (0.952; 1.03)  |
|                                        | 6                  | 63615         |                     |                      |                      | 1.033 (0.994; 1.073) | 1.017 (0.978; 1.056) |
|                                        | 7                  | 98949         |                     |                      |                      | 1.049 (1.011; 1.088) | 1.031 (0.993; 1.069) |
|                                        | 8                  | 123460        |                     |                      |                      | 1.086 (1.048; 1.126) | 1.068 (1.03; 1.108)  |
|                                        | 9                  | 127253        |                     |                      |                      | 1.056 (1.018; 1.095) | 1.046 (1.009; 1.086) |
|                                        | 10                 | 142291        |                     |                      |                      | 1.03 (0.993; 1.069)  | 1.049 (1.011; 1.088) |
| <b>Referring physician</b>             | No <sup>4</sup>    | 57596         |                     |                      |                      |                      | 1                    |
|                                        | Yes                | 654207        |                     |                      |                      |                      | 5.389 (5.227; 5.557) |

<sup>4</sup> Reference category

#### 4. Discussion

Our study highlighted a link between deprivation and breast and cervical cancers screening uptake, in and outside the recommended age groups. This link follows a social gradient across all socioeconomic levels. The gradient was stronger in large urban areas. The successive inclusion of variables indicating financial precarity, healthcare accessibility, and adherence to the healthcare system decreased only very slightly the association, suggesting that these variables explain a very limited extent of the link between EDI and screening uptake. The social and territorial disparities in mammography uptake were lower in the recommended age group than outside.

The main strength of our study is its power and comprehensiveness, achieved by using health insurance data. Using both individual and contextual variables to investigate the link between an ecological deprivation index and screening uptake is original. Another original aspect is the exploration of screening uptake outside the recommended age groups and the observation of two different implementation modes for national recommendations (with and without a screening programme). Our study also has limitations. As our data covered only 1 year, we could not differentiate between women who had screening tests every year (more often than recommended) and the ones who had it every two and three years as recommended. It raises the question of excess screening and its link with SEP. In our dataset, pap smears prescribed for diagnostic purposes could not be distinguished from those performed in a screening context. The limited number of individual and contextual variables in our dataset restrained our capability to disentangle what could be explained by contextual and individual properties in the associations we observed with EDI. The same difficulty limited the exploration of financial, physical, and sociocultural accessibility mechanisms involved in the social gradient.

1  
2  
3 We complemented existing literature on social inequalities in access to mammography and pap  
4 smear. The link between deprivation and screening participation was found in numerous  
5 countries all over the world, irrespective of the local healthcare policy. In the United States,  
6 where no centrally organised cancer screening programme exists, this link was repeatedly  
7 reported at an individual and at an area levels (22–25). In most Western European countries,  
8 nationally organised screening programmes are in place. The studies conducted there also  
9 showed an impact of SEP (26–28). In France, the lack of individual socioeconomic variable in  
10 healthcare datasets has made it difficult to obtain large and representative evidence. A few  
11 cohort studies have been conducted, but were limited by the relatively small sample size  
12 (7,29,30). Using healthcare insurance reimbursement data merged with sociodemographic  
13 information made it possible to assess the impact of socioterritorial inequalities in larger studies,  
14 more representative of the French population (31).

15  
16  
17 Our study tried to identify some of the mechanisms involved in the link between deprivation  
18 and screening uptake. One of our hypotheses was that deprivation leads to limitations of the  
19 three dimensions of healthcare accessibility: financial, physical, and sociocultural. We used  
20 CMU-C to explore the effect of financial precarity in the link between deprivation and screening  
21 uptake and GP PLA, a proxy for healthcare supply, to reflect physical accessibility. Our result  
22 suggests that the association between deprivation and screening uptake is very slightly  
23 influenced by these variables. This could be due to the choice of variables used in our model.  
24 CMU-C may not be enough precise to measure financial accessibility. GP PLA is a good proxy  
25 for physical accessibility to primary care, but maybe not to specialty care. Regarding  
26 sociocultural accessibility, no truly relevant variable was available in our dataset. Our results  
27 showed that the overall adherence to the healthcare system, approached by having a referring  
28 physician, only modified slightly the link between EDI and screening uptake. However  
29 sociocultural accessibility covers several concepts. Using psychological models, R. Crockett  
30

1  
2  
3 explained that the most deprived people focus more on present time (32). They concentrate on  
4 the inconvenience of the screening rather than on the possible long-term benefits. A measure  
5 of this mechanism, the fear of the result, language barriers or cultural representations (33) could  
6  
7  
8 be better proxies for sociocultural accessibility.  
9  
10

11  
12  
13 However, our study suggests that having a referring physician has a substantial direct impact  
14 on pap smear and mammography uptake. This key role of primary care providers was observed  
15 in other countries, like the United States and Canada (34,35). The improvement in screening  
16 uptake in people with a referring physician could be due to the direct role of the physician in  
17  
18 overcoming the barriers to screening. This result might also be explained by another  
19 phenomenon linked to healthcare access: the patient's understanding of and capacity to navigate  
20 the healthcare system.  
21  
22  
23  
24  
25  
26  
27  
28  
29

30 We confirmed territorial disparities in screening access. Large urban areas had higher  
31 participation rates than the rest of the region. These rural/urban disparities were observed in  
32 several studies in Western Europe and North America (17–19,28,36,37). The social gradient  
33 also appeared generally stronger in large urban areas. But even in the other areas, the most  
34 deprived populations had a lower screening access. These results corroborate the assumption  
35 that the social gradient is stronger if the healthcare supply is sufficient, but access to care of the  
36 most deprived remains lower whatever the place  
37  
38  
39  
40  
41  
42  
43  
44  
45

46 We observed that the social and territorial disparities in mammography uptake were lower  
47 inside the recommended age group than for younger women.. We did not observe the same  
48 trend for pap smear uptake. This difference could be explained by the nationally organised  
49 screening programme in place for breast cancer at the time of data collection but not for cervical  
50 cancer. Some studies suggested that tools used in the breast cancer screening programme might  
51 help decrease inequalities of access (38,39), but other showed that a national programme, with  
52  
53  
54  
55  
56  
57  
58  
59  
60

1  
2  
3 the exact same actions for every women, while improving overall participation rates, could also  
4  
5 increase the social gradient in uptake (40). Pap smear and mammography uptake also appeared  
6  
7 very high in women younger than the recommended age. While the social gradient within the  
8  
9 recommended age groups is likely to be explained by a low uptake in deprived populations, its  
10  
11 existence among younger and older women may indicate an overuse of screening in high SEP  
12  
13 populations (41). Regarding women older than the recommended age, we observed a higher  
14  
15 effect of territorial disparities on screening uptake (rural/urban disparities and effect of GP  
16  
17 accessibility). This suggests that older women could have more difficulty adapting to territorial  
18  
19 barriers.  
20  
21  
22  
23

24 Developing global dataset combining health data and diverse socioeconomic data, at individual  
25  
26 and contextual levels, could enable a better understanding of the mechanisms involved in this  
27  
28 social gradient, and therefore the development of targeted territorial actions to improve equity  
29  
30 of access to healthcare.  
31  
32  
33  
34  
35  
36  
37  
38  
39  
40  
41  
42  
43  
44  
45  
46  
47  
48  
49  
50  
51  
52  
53  
54  
55  
56  
57  
58  
59  
60



1  
2  
3 Author contributions: LO: Conceptualisation, Methodology, Formal analysis, Funding  
4 acquisition, Writing – original draft and review & editing. CD: Conceptualisation,  
5 Methodology, Formal analysis, Supervision, Validation. PG: Conceptualisation, Data  
6 curation, Methodology, Formal analysis, Supervision, Validation. MERB: Conceptualisation,  
7 Funding acquisition, Validation. SL: Methodology, Formal analysis, Writing – review,  
8 Validation. VD: Writing – review, Validation.

9  
10  
11  
12  
13  
14  
15  
16  
17 All authors read, edited, and approved the final manuscript.

18  
19  
20  
21  
22  
23 Acknowledgments:

24  
25  
26 We gratefully acknowledge Sarah Ouanhnon for her translation help and her many advice.  
27  
28 Many thanks to Hervé Mainsonneuve for his careful reading and his precious advice. We wish  
29 to thank all the members of the research team: Marine Maurel for her skills with R-software,  
30  
31 Camille Joanes for her advice, and all the other members. The research team is supported by  
32  
33 the French association “La Ligue contre le cancer”.

34  
35  
36  
37  
38  
39  
40  
41 Data availability statements: This study is conformed to the principles embodied in the  
42 Declaration of Helsinki. The data we used in this study belongs to the French National Health  
43 Insurance. The procurement of such data necessitates the agreement of the French National  
44 Institute of Health Data (INDS) and the permission from the ‘Commission Nationale  
45 Informatique et Liberté’s’ (CNIL) which is the French Data Protection Authority in accordance  
46 with Law No 78/17 of 6 January 1978 on computing, files and personal information, article 54,  
47 paragraph I. Data cannot be diffused without these authorisations. A CNIL Authorisation (no.  
48 1634837) was obtained for our study. In addition, data cannot be shared with anyone who does  
49  
50  
51  
52  
53  
54  
55  
56  
57  
58  
59  
60

1  
2  
3 not have these authorisations. In our study, the Regional Health Agency of Occitanie completed  
4 the necessary formalities with the relevant authorities. If other authors want to obtain the data,  
5 they have to contact directly the French National Institute of Health Data and obtain the  
6 permission of the CNIL. It can be done on the INDS website (<http://www.indsante.fr/>). In  
7 addition, data regarding demographical characteristics of the whole inhabitants of the region  
8 can be freely obtained from the French national institute for statistics and economic studies  
9 (<https://www.insee.fr/fr/statistiques/>).

10  
11  
12  
13  
14  
15  
16  
17  
18  
19 Ethics statement: According to French registration, the ethics Committee approval is not  
20 applicable for this study (on pre-existing dataset).

21  
22  
23 This study is conformed to the principles embodied in the Declaration of Helsinki. The  
24 authors obtained an agreement of the French National Institute of Health Data (INDS) and the  
25 permission from the ‘Commission Nationale Informatique et Liberte’s’ (CNIL) which is the  
26 French Data Protection Authority in accordance with Law No 78/17 of 6 January 1978 on  
27 computing, files and personal information, article 54, paragraph I. CNIL Authorisation: no.  
28 1634837.

29  
30  
31  
32  
33  
34 Funding Statement: This work was supported by Toulouse Hospital (“allocation jeune  
35 chercheur de la DRCI”, Direction de la Recherche Clinique et de l’Innovation). There is no  
36 grant number: Toulouse Hospital allocates this grant to young doctors who wish to deepen  
37 their knowledge in research, after studying their research project.

38  
39  
40  
41  
42  
43  
44 Declaration of Competing Interest: The authors have declared that no competing interests  
45 exist.

## 46 47 48 49 50 References

- 51  
52 1. International Agency for research on Cancer. Estimated number of deaths in 2020, breast,  
53 females, all ages: IARC Gobocan [Internet]. Available from: [https://gco.iarc.fr/today/online-analysis-table?v=2020&mode=population&mode\\_population=countries&population=900&populations=900&key=asr&sex=2&cancer=20&type=1&statistic=5&prevalence=0&population\\_group=0&ages\\_group%5B%5D=0&ages\\_group%5B%5D=17&group\\_cancer=1&include\\_nmsc=1&include\\_nmsc\\_other=1](https://gco.iarc.fr/today/online-analysis-table?v=2020&mode=population&mode_population=countries&population=900&populations=900&key=asr&sex=2&cancer=20&type=1&statistic=5&prevalence=0&population_group=0&ages_group%5B%5D=0&ages_group%5B%5D=17&group_cancer=1&include_nmsc=1&include_nmsc_other=1)

- 1  
2  
3 2. Institut National du Cancer. Le programme de dépistage organisé - Dépistage du cancer du sein  
4 [Internet]. cancer.fr. 2019. Available from: [https://www.e-cancer.fr/Professionnels-de-](https://www.e-cancer.fr/Professionnels-de-sante/Depistage-et-detection-precoce/Depistage-du-cancer-du-sein/Le-programme-de-depistage-organise)  
5 [sante/Depistage-et-detection-precoce/Depistage-du-cancer-du-sein/Le-programme-de-](https://www.e-cancer.fr/Professionnels-de-sante/Depistage-et-detection-precoce/Depistage-du-cancer-du-sein/Le-programme-de-depistage-organise)  
6 [depistage-organise](https://www.e-cancer.fr/Professionnels-de-sante/Depistage-et-detection-precoce/Depistage-du-cancer-du-sein/Le-programme-de-depistage-organise)  
7
- 8  
9 3. INCA. Le programme de dépistage organisé du cancer du col de l'utérus - Dépistage du cancer  
10 du col de l'utérus [Internet]. Available from: [https://www.e-cancer.fr/Professionnels-de-](https://www.e-cancer.fr/Professionnels-de-sante/Depistage-et-detection-precoce/Depistage-du-cancer-du-col-de-l-uterus/Le-programme-de-depistage-organise)  
11 [sante/Depistage-et-detection-precoce/Depistage-du-cancer-du-col-de-l-uterus/Le-programme-](https://www.e-cancer.fr/Professionnels-de-sante/Depistage-et-detection-precoce/Depistage-du-cancer-du-col-de-l-uterus/Le-programme-de-depistage-organise)  
12 [de-depistage-organise](https://www.e-cancer.fr/Professionnels-de-sante/Depistage-et-detection-precoce/Depistage-du-cancer-du-col-de-l-uterus/Le-programme-de-depistage-organise)  
13
- 14 4. Santé publique France. Evaluation du programme de dépistage du cancer du col de l'utérus  
15 [Internet]. [cited 2020 May 13]. Available from: [http://santepubliquefrance.fr/maladies-et-](http://santepubliquefrance.fr/maladies-et-traumatismes/cancers/cancer-du-col-de-l-uterus/articles/evaluation-du-programme-de-depistage-du-cancer-du-col-de-l-uterus)  
16 [traumatismes/cancers/cancer-du-col-de-l-uterus/articles/evaluation-du-programme-de-](http://santepubliquefrance.fr/maladies-et-traumatismes/cancers/cancer-du-col-de-l-uterus/articles/evaluation-du-programme-de-depistage-du-cancer-du-col-de-l-uterus)  
17 [depistage-du-cancer-du-col-de-l-uterus](http://santepubliquefrance.fr/maladies-et-traumatismes/cancers/cancer-du-col-de-l-uterus/articles/evaluation-du-programme-de-depistage-du-cancer-du-col-de-l-uterus)  
18
- 19 5. Poiseuil M, Coureau G, Payet C, Savès M, Debled M, Mathoulin-Pelissier S, et al. Deprivation  
20 and mass screening: Survival of women diagnosed with breast cancer in France from 2008 to  
21 2010. *Cancer Epidemiol.* 2019;60:149–55.  
22
- 23 6. Duport N, Serra D, Goulard H, Bloch J. Quels facteurs influencent la pratique du dépistage des  
24 cancers féminins en France ? *Revue d'Épidémiologie et de Santé Publique.* 2008 Oct  
25 1;56(5):303–13.  
26
- 27 7. Grillo F, Vallée J, Chauvin P. Inequalities in cervical cancer screening for women with or without  
28 a regular consulting in primary care for gynaecological health, in Paris, France. *Prev Med.* 2012  
29 Apr;54(3–4):259–65.  
30
- 31 8. Delpierre C, Fantin R, Chehoud H, Nicoules V, Bayle A, Souche A, et al. Inégalités sociales  
32 d'accès aux soins et à la prévention en Midi-Pyrénées, France, 2012. 2016; Available from:  
33 [http://invs.santepubliquefrance.fr//beh/2016/1/2016\\_1\\_1.html](http://invs.santepubliquefrance.fr//beh/2016/1/2016_1_1.html)  
34
- 35 9. Evans DB, Hsu J, Boerma T. Universal health coverage and universal access. *Bull World Health*  
36 *Organ.* 2013 Aug;91:546-546A.  
37
- 38 10. Thiede M, Akweongo P, McIntyre D. Exploring the dimensions of access. In: McIntyre D,  
39 Mooney G, editors. *The Economics of Health Equity* [Internet]. Cambridge: Cambridge  
40 University Press; 2007 [cited 2020 Jun 8]. p. 103–23. Available from:  
41 [https://www.cambridge.org/core/books/economics-of-health-equity/exploring-the-](https://www.cambridge.org/core/books/economics-of-health-equity/exploring-the-dimensions-of-access/684DFDF7B640370D207C59FEAFC967E7)  
42 [dimensions-of-access/684DFDF7B640370D207C59FEAFC967E7](https://www.cambridge.org/core/books/economics-of-health-equity/exploring-the-dimensions-of-access/684DFDF7B640370D207C59FEAFC967E7)  
43
- 44 11. HCSP. Les systèmes d'information pour la santé publique [Internet]. Paris: Haut Conseil de la  
45 Santé Publique; 2009 Nov [cited 2019 Mar 10]. Available from:  
46 <https://www.hcsp.fr/explore.cgi/avisrapportsdomaine?clefr=175>  
47
- 48 12. Ducros D, Nicoules V, Chehoud H, Bayle A, Souche A, Tanguy M, et al. Les bases médico-  
49 administratives pour mesurer les inégalités sociales de santé. *Sante Publique.* 2015 Aug 24;Vol.  
50 27(3):383–94.  
51
- 52 13. Pornet C, Delpierre C, Dejardin O, Grosclaude P, Launay L, Guittet L, et al. Construction of an  
53 adaptable European transnational ecological deprivation index: the French version. *J Epidemiol*  
54 *Community Health.* 2012 Nov;66(11):982–9.  
55  
56  
57  
58  
59  
60

- 1  
2  
3 14. Yang XY, Hu A, Schieman S. Relative deprivation in context: How contextual status homogeneity  
4 shapes the relationship between disadvantaged social status and health. *Social Science*  
5 *Research*. 2019 Jul 1;81:157–69.  
6
- 7  
8 15. Muriel Barlet, Magali Coldefy, Clémentine Collin, Véronique Lucas-Gabrielli. L'Accessibilité  
9 potentielle localisée (APL) : une nouvelle mesure de l'accessibilité aux soins appliquée aux  
10 médecins généralistes libéraux en France [Internet]. Drees; 2012. Available from:  
11 [https://drees.solidarites-sante.gouv.fr/etudes-et-statistiques/publications/documents-de-](https://drees.solidarites-sante.gouv.fr/etudes-et-statistiques/publications/documents-de-travail/serie-etudes-et-recherche/article/l-accessibilite-potentielle-localisee-apl-une-nouvelle-mesure-de-l)  
12 [travail/serie-etudes-et-recherche/article/l-accessibilite-potentielle-localisee-apl-une-nouvelle-](https://drees.solidarites-sante.gouv.fr/etudes-et-statistiques/publications/documents-de-travail/serie-etudes-et-recherche/article/l-accessibilite-potentielle-localisee-apl-une-nouvelle-mesure-de-l)  
13 [mesure-de-l](https://drees.solidarites-sante.gouv.fr/etudes-et-statistiques/publications/documents-de-travail/serie-etudes-et-recherche/article/l-accessibilite-potentielle-localisee-apl-une-nouvelle-mesure-de-l)  
14
- 15  
16 16. Short SE, Mollborn S. Social Determinants and Health Behaviors: Conceptual Frames and  
17 Empirical Advances. *Curr Opin Psychol*. 2015 Oct;5:78–84.
- 18  
19 17. Chandak A, Nayar P, Lin G. Rural-Urban Disparities in Access to Breast Cancer Screening: A  
20 Spatial Clustering Analysis. *J Rural Health*. 2019;35(2):229–35.
- 21  
22 18. Orwat J, Caputo N, Key W, De Sa J. Comparing Rural and Urban Cervical and Breast Cancer  
23 Screening Rates in a Privately Insured Population. *Soc Work Public Health*. 2017;32(5):311–23.  
24
- 25  
26 19. Leung J, McKenzie S, Martin J, McLaughlin D. Effect of rurality on screening for breast cancer: a  
27 systematic review and meta-analysis comparing mammography. *Rural Remote Health*.  
28 2014;14(2):2730.
- 29  
30 20. INSEE (Institut National de la Statistique et des Etudes Economiques). Le nouveau zonage en  
31 aires urbaines de 2010 - Insee Première - 1374 [Internet]. 2010 [cited 2021 Nov 26]. Available  
32 from: <https://www.insee.fr/fr/statistiques/1281191>
- 33  
34 21. R Core Team. R: A language and environment for statistical computing. [Internet]. 2013.  
35 Available from: <http://www.R-project.org/>
- 36  
37 22. Smith RA, Andrews KS, Brooks D, Fedewa SA, Manassaram-Baptiste D, Saslow D, et al. Cancer  
38 screening in the United States, 2019: A review of current American Cancer Society guidelines  
39 and current issues in cancer screening. *CA: A Cancer Journal for Clinicians*. 2019;69(3):184–210.  
40
- 41  
42 23. Dailey AB, Kasl SV, Holford TR, Calvocoressi L, Jones BA. Neighborhood-Level Socioeconomic  
43 Predictors of Nonadherence to Mammography Screening Guidelines. *Cancer Epidemiol*  
44 *Biomarkers Prev*. 2007 Nov 1;16(11):2293–303.
- 45  
46 24. Dailey AB, Brumback BA, Livingston MD, Jones BA, Curbow BA, Xu X. Area-Level Socioeconomic  
47 Position and Repeat Mammography Screening Use: Results from the 2005 National Health  
48 Interview Survey. *Cancer Epidemiol Biomarkers Prev*. 2011 Nov 1;20(11):2331–44.
- 49  
50 25. Murfin J, Irvine F, Meechan-Rogers R, Swift A. Education, income and occupation and their  
51 influence on the uptake of cervical cancer prevention strategies: A systematic review. *J Clin*  
52 *Nurs*. 2020 Feb;29(3–4):393–415.  
53
- 54  
55 26. Borràs JM, Guillen M, Sanchez V, Juncà S, Vicente R. Educational level, voluntary private health  
56 insurance and opportunistic cancer screening among women in Catalonia (Spain): *European*  
57 *Journal of Cancer Prevention*. 1999 Oct;8(5):427–34.  
58  
59  
60

- 1
- 2
- 3
- 4 27. Douglas E, Waller J, Duffy SW, Wardle J. Socioeconomic inequalities in breast and cervical
- 5 screening coverage in England: are we closing the gap? *J Med Screen*. 2016;23(2):98–103.
- 6
- 7 28. Massat NJ, Douglas E, Waller J, Wardle J, Duffy SW. Variation in cervical and breast cancer
- 8 screening coverage in England: a cross-sectional analysis to characterise districts with atypical
- 9 behaviour. *BMJ Open*. 2015 Jul 24;5(7):e007735.
- 10
- 11 29. Eisinger F, Viguier J, Touboul C, Coscas Y, Pivot X, Blay J-Y, et al. Social stratification, risk factor
- 12 prevalence and cancer screening attendance. *Eur J Cancer Prev*. 2015 Jun;24 Suppl:S77-81.
- 13
- 14 30. Chauvin P, Parizot I. Les inégalités sociales et territoriales de santé dans l'agglomération
- 15 parisienne. Une analyse de la cohorte Sirs (2005) [Internet]. Délégation interministérielle à la
- 16 Ville; 2009 [cited 2020 Jun 1]. Available from: <https://www.hal.inserm.fr/inserm-00415971>
- 17
- 18 31. Deborde T, Chatignoux E, Quintin C, Beltzer N, Hamers FF, Rogel A. Breast cancer screening
- 19 programme participation and socioeconomic deprivation in France. *Prev Med*. 2018;115:53–60.
- 20
- 21 32. Crockett R, Wilkinson TM, Marteau TM. Social patterning of screening uptake and the impact of
- 22 facilitating informed choices: psychological and ethical analyses. *Health Care Anal*. 2008
- 23 Mar;16(1):17–30.
- 24
- 25 33. Szarewski A, Cadman L, Ashdown-Barr L, Waller J. Exploring the acceptability of two self-
- 26 sampling devices for human papillomavirus testing in the cervical screening context: a
- 27 qualitative study of Muslim women in London. *J Med Screen*. 2009;16(4):193–8.
- 28
- 29 34. Schueler KM, Chu PW, Smith-Bindman R. Factors Associated with Mammography Utilization: A
- 30 Systematic Quantitative Review of the Literature. *Journal of Women's Health*. 2008 Oct
- 31 27;17(9):1477–98.
- 32
- 33 35. Beaulieu MD, Béland F, Roy D, Falardeau M, Hébert G. Factors determining compliance with
- 34 screening mammography. *CMAJ*. 1996 May 1;154(9):1335–43.
- 35
- 36 36. Ouédraogo S, Dabakuyo-Yonli TS, Roussot A, Dialla PO, Pornet C, Poillot M-L, et al. [Breast
- 37 cancer screening in thirteen French departments]. *Bull Cancer*. 2015 Feb;102(2):126–38.
- 38
- 39 37. Ouédraogo S, Dabakuyo-Yonli TS, Roussot A, Pornet C, Sarlin N, Lunaud P, et al. European
- 40 transnational ecological deprivation index and participation in population-based breast cancer
- 41 screening programmes in France. *Prev Med*. 2014 Jun;63:103–8.
- 42
- 43 38. Cancer Care Ontario. Cancer Fact: Invitation letters improve breast screening behaviour
- 44 [Internet]. 2016 [cited 2020 May 13]. Available from:
- 45 [https://www.cancercareontario.ca/en/cancer-facts/invitation-letters-improve-breast-](https://www.cancercareontario.ca/en/cancer-facts/invitation-letters-improve-breast-screening-behaviour)
- 46 [screening-behaviour](https://www.cancercareontario.ca/en/cancer-facts/invitation-letters-improve-breast-screening-behaviour)
- 47
- 48 39. Everett T, Bryant A, Griffin MF, Martin-Hirsch PP, Forbes CA, Jepson RG. Interventions targeted
- 49 at women to encourage the uptake of cervical screening. *Cochrane Database of Systematic*
- 50 *Reviews* [Internet]. 2011 [cited 2019 Oct 16];(5). Available from:
- 51 <https://www.cochranelibrary.com/cdsr/doi/10.1002/14651858.CD002834.pub2/full>
- 52
- 53 40. Raginel T, de Mil R, Garnier A, Launoy G, Guittet L. National organization of uterine cervical
- 54 cancer screening and social inequality in France. *European Journal of Cancer Prevention*
- 55 [Internet]. 2019 Dec 10 [cited 2020 Jun 1]; Publish Ahead of Print. Available from:
- 56
- 57
- 58
- 59
- 60

1  
2  
3 [https://journals.lww.com/eurjcancerprev/Abstract/9000/National\\_organization\\_of\\_uterine\\_cervical\\_cancer.99158.aspx](https://journals.lww.com/eurjcancerprev/Abstract/9000/National_organization_of_uterine_cervical_cancer.99158.aspx)

- 4  
5  
6 41. Autier P. [Screening for breast cancer: worries about its effectiveness]. Rev Prat. 2013  
7 Dec;63(10):1369–77.  
8  
9  
10  
11  
12  
13  
14  
15  
16

17 **Figure 1: Conceptual model**

18 *Links between the studied variables assumed to explain the impact of deprivation on screening uptake,*  
19 *depending on the level of urbanisation.*  
20

21  
22  
23 **Figure 2: Mammography and pap smear uptake and combined variable EDI in large urban/other areas by age group,**  
24 **Midi Pyrenees region, 2012.**

25 *Results from a logistic model adjusted for EDI by age, CMU-C, GP PLA, having an official referring physician.*  
26 *Data from models 5 (Table 2 and 3) for the recommended age groups.*  
27  
28  
29  
30  
31  
32  
33  
34  
35  
36  
37  
38  
39  
40  
41  
42  
43  
44  
45  
46  
47  
48  
49  
50  
51  
52  
53  
54  
55  
56  
57  
58  
59  
60



**Figure 1: Conceptual model**  
 Links between the studied variables assumed to explain the impact of deprivation on screening uptake, depending on the level of urbanisation.

view only

**Figure 2: Mammography and pap smear uptake and combined variable EDI in large urban/other areas by age group, Midi Pyrenees region, 2012.**  
 Results from a logistic model adjusted for EDI by age, CMU-C, GP PLA, having an official referring physician.  
 Data from models 5 (Table 2 and 3) for the recommended age groups.

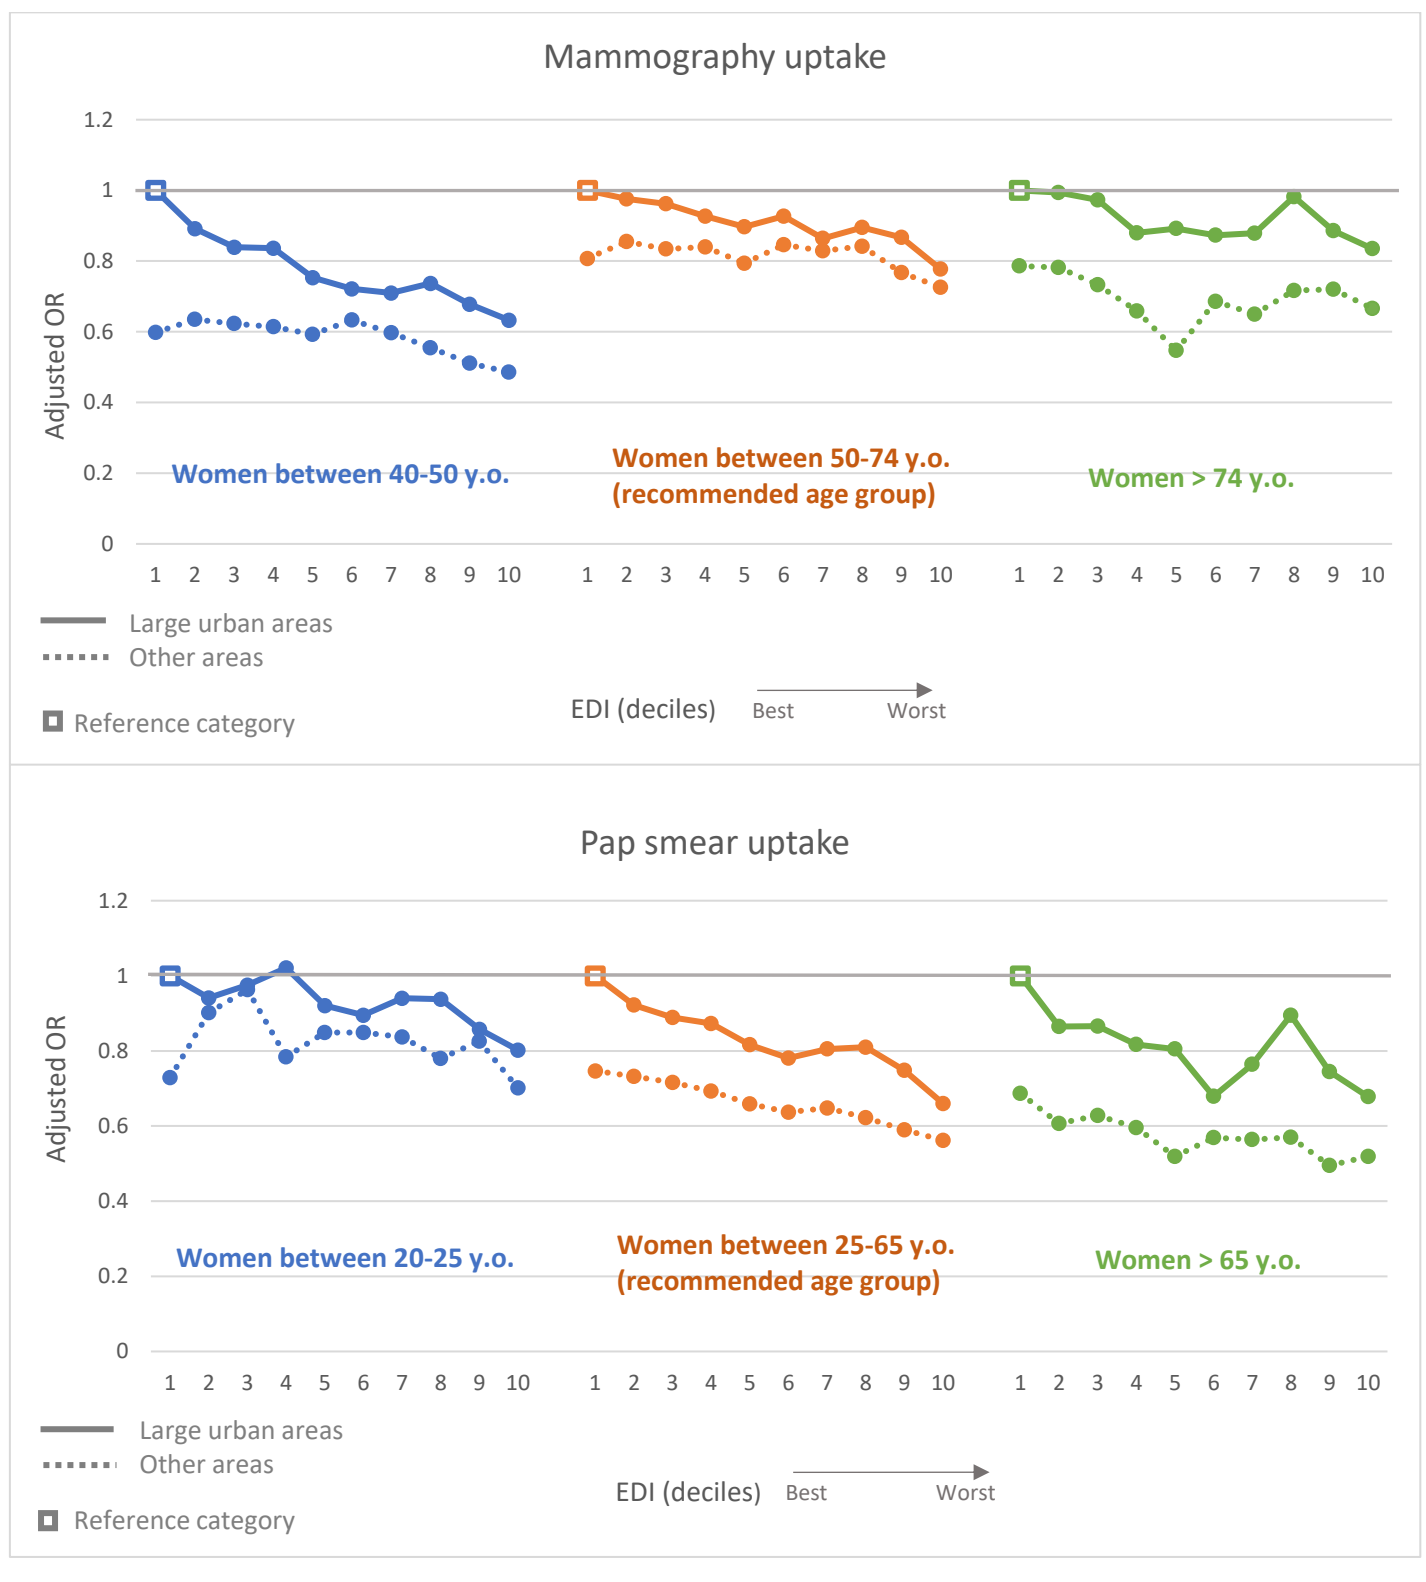



1  
2  
3  
4  
5  
6  
7  
8  
9  
10  
11  
12  
13  
14  
15  
16  
17  
18  
19  
20  
21  
22  
23  
24  
25  
26  
27  
28  
29  
30  
31  
32  
33  
34  
35  
36  
37  
38  
39  
40  
41  
42  
43  
44  
45  
46  
47  
48  
49  
50  
51  
52  
53  
54  
55  
56  
57  
58  
59  
60

For peer review only

## Supplementary material

### *Tables A: Characteristics of women in recommended age groups for gynaecological screening programmes in Midi Pyrénées*

| <b>Characteristics of women between 50 and 74 y.o. (recommended age group for mammography)</b> |                            |                               |                    |
|------------------------------------------------------------------------------------------------|----------------------------|-------------------------------|--------------------|
| <b>N= 365 947</b>                                                                              |                            |                               |                    |
|                                                                                                | <b>Toulouse Metropolis</b> | <b>Other large urban area</b> | <b>Other area</b>  |
|                                                                                                | n= 72919 (19.93%)          | n= 150755 (41.2%)             | n= 142273 (38.88%) |
|                                                                                                | n (%)                      | n (%)                         | n (%)              |
| <b>Mammography</b>                                                                             |                            |                               |                    |
| No Mammography                                                                                 | 49978 (68.54)              | 102663 (68.1)                 | 100713 (70.79)     |
| ≥ 1 in the year                                                                                | 22941 (31.46)              | 48092 (31.9)                  | 41560 (29.21)      |
| <b>Age</b>                                                                                     |                            |                               |                    |
| Mean (SD)                                                                                      | 60.7 (6.8)                 | 60.9 (6.9)                    | 61.6 (6.9)         |
| <b>Age (/5years)</b>                                                                           |                            |                               |                    |
| 50-55 y.o                                                                                      | 19112 (26.21)              | 37568 (24.92)                 | 31561 (22.18)      |
| 55-60 y.o                                                                                      | 17097 (23.45)              | 34985 (23.21)                 | 31044 (21.82)      |
| 60-65 y.o                                                                                      | 15774 (21.63)              | 33460 (22.19)                 | 31975 (22.47)      |
| 65-70 y.o,                                                                                     | 12305 (16.87)              | 25825 (17.13)                 | 26664 (18.74)      |
| 70-75 y.o                                                                                      | 8631 (11.84)               | 18917 (12.55)                 | 21029 (14.78)      |
| <b>EDI (deciles: 1=best)</b>                                                                   |                            |                               |                    |
| 1                                                                                              | 7886 (10.81)               | 20596 (13.66)                 | 2719 (1.91)        |
| 2                                                                                              | 8615 (11.81)               | 20315 (13.48)                 | 5896 (4.14)        |
| 3                                                                                              | 4436 (6.08)                | 15563 (10.32)                 | 10112 (7.11)       |
| 4                                                                                              | 3484 (4.78)                | 14848 (9.85)                  | 13232 (9.3)        |
| 5                                                                                              | 8183 (11.22)               | 11820 (7.84)                  | 12730 (8.95)       |
| 6                                                                                              | 3368 (4.62)                | 16244 (10.78)                 | 19906 (13.99)      |
| 7                                                                                              | 6678 (9.16)                | 12055 (8)                     | 20092 (14.12)      |
| 8                                                                                              | 6367 (8.73)                | 10760 (7.14)                  | 20741 (14.58)      |
| 9                                                                                              | 9519 (13.05)               | 12192 (8.09)                  | 20679 (14.53)      |
| 10                                                                                             | 14383 (19.72)              | 16362 (10.85)                 | 16166 (11.36)      |
| <b>CMU-C</b>                                                                                   |                            |                               |                    |
| No CMU-C                                                                                       | 68850 (94.42)              | 145641 (96.61)                | 137381 (96.56)     |
| CMU-C                                                                                          | 4069 (5.58)                | 5114 (3.39)                   | 4892 (3.44)        |
| <b>GP PLA (deciles: 10= best)</b>                                                              |                            |                               |                    |
| 1                                                                                              | 363 (0.5)                  | 1744 (1.16)                   | 9320 (6.55)        |
| 2                                                                                              | 922 (1.26)                 | 4887 (3.24)                   | 7958 (5.59)        |
| 3                                                                                              | 0 (0)                      | 6290 (4.17)                   | 8165 (5.74)        |
| 4                                                                                              | 803 (1.1)                  | 9625 (6.38)                   | 10154 (7.14)       |
| 5                                                                                              | 1409 (1.93)                | 14229 (9.44)                  | 10767 (7.57)       |
| 6                                                                                              | 2695 (3.7)                 | 17381 (11.53)                 | 12186 (8.57)       |
| 7                                                                                              | 9531 (13.07)               | 25353 (16.82)                 | 15979 (11.23)      |
| 8                                                                                              | 14772 (20.26)              | 25147 (16.68)                 | 22412 (15.75)      |
| 9                                                                                              | 15456 (21.2)               | 27726 (18.39)                 | 20949 (14.72)      |
| 10                                                                                             | 26968 (36.98)              | 18373 (12.19)                 | 24383 (17.14)      |
| <b>Referring physician</b>                                                                     |                            |                               |                    |
| No designated referring physician                                                              | 4898 (6.72)                | 7428 (4.93)                   | 7706 (5.42)        |
| Official referring physician                                                                   | 68021 (93.28)              | 143327 (95.07)                | 134567 (94.58)     |

## Characteristics of women between 25 and 65 y.o. (recommended age group for pap smear)

N= 711 803

|                                   | Toulouse Metropolis         | Other large urban areas     | Other areas                |
|-----------------------------------|-----------------------------|-----------------------------|----------------------------|
|                                   | n= 180030 (25.59%)<br>n (%) | n= 302563 (42.61%)<br>n (%) | n= 229210 (32.2%)<br>n (%) |
| <b>Pap smear</b>                  |                             |                             |                            |
| No Pap smear                      | 123038 (68.34)              | 211072 (69.76)              | 172621 (75.31)             |
| ≥ 1 in the year                   | 56992 (31.66)               | 91491 (30.24)               | 56589 (24.69)              |
| <b>Age</b>                        |                             |                             |                            |
| Mean (SD)                         | 42.9 (11.8)                 | 45.5 (11.4)                 | 47.2 (11.4)                |
| <b>Age (/5years)</b>              |                             |                             |                            |
|                                   | n= 180030                   | n= 302563                   | n= 229210                  |
| 25-30 y.o                         | 30798 (17.11)               | 32111 (10.61)               | 19504 (8.51)               |
| 30-35 y.o                         | 28146 (15.63)               | 36721 (12.14)               | 23382 (10.2)               |
| 35-40 y.o                         | 23292 (12.94)               | 37351 (12.34)               | 24557 (10.71)              |
| 40-45 y.o                         | 21537 (11.96)               | 41983 (13.88)               | 29444 (12.85)              |
| 45-50 y.o                         | 21259 (11.81)               | 41829 (13.82)               | 31203 (13.61)              |
| 50-55 y.o                         | 19112 (10.62)               | 37568 (12.42)               | 31561 (13.77)              |
| 55-60 y.o                         | 17097 (9.5)                 | 34985 (11.56)               | 31044 (13.54)              |
| 60-65 y.o                         | 15774 (8.76)                | 33460 (11.06)               | 31975 (13.95)              |
| 65-70 y.o,                        | 3015 (1.67)                 | 6555 (2.17)                 | 6540 (2.85)                |
| <b>EDI (deciles: 1=best)</b>      |                             |                             |                            |
| 1                                 | 14747 (8.19)                | 42750 (14.13)               | 4741 (2.07)                |
| 2                                 | 19389 (10.77)               | 41657 (13.77)               | 9906 (4.32)                |
| 3                                 | 10922 (6.07)                | 32952 (10.89)               | 16889 (7.37)               |
| 4                                 | 8239 (4.58)                 | 30690 (10.14)               | 21643 (9.44)               |
| 5                                 | 21020 (11.68)               | 23450 (7.75)                | 20561 (8.97)               |
| 6                                 | 9173 (5.1)                  | 32475 (10.73)               | 31816 (13.88)              |
| 7                                 | 17062 (9.48)                | 23586 (7.8)                 | 31628 (13.8)               |
| 8                                 | 17051 (9.47)                | 20967 (6.93)                | 32394 (14.13)              |
| 9                                 | 26337 (14.63)               | 22732 (7.51)                | 33163 (14.47)              |
| 10                                | 36090 (20.05)               | 31304 (10.35)               | 26469 (11.55)              |
| <b>CMU-C</b>                      |                             |                             |                            |
| No CMU-C                          | 161075 (89.47)              | 281794 (93.14)              | 213100 (92.97)             |
| CMU-C                             | 18955 (10.53)               | 20769 (6.86)                | 16110 (7.03)               |
| <b>GP PLA (deciles: 10= best)</b> |                             |                             |                            |
| 1                                 | 831 (0.46)                  | 3162 (1.05)                 | 14614 (6.38)               |
| 2                                 | 2273 (1.26)                 | 9407 (3.11)                 | 12705 (5.54)               |
| 3                                 | 0 (0%)                      | 12683 (4.19)                | 13438 (5.86)               |
| 4                                 | 1815 (1.01)                 | 18903 (6.25)                | 16589 (7.24)               |
| 5                                 | 3312 (1.84)                 | 28690 (9.48)                | 17813 (7.77)               |
| 6                                 | 6666 (3.7)                  | 36519 (12.07)               | 20430 (8.91)               |
| 7                                 | 20097 (11.16)               | 52821 (17.46)               | 26031 (11.36)              |
| 8                                 | 37194 (20.66)               | 51056 (16.87)               | 35210 (15.36)              |
| 9                                 | 38815 (21.56)               | 54907 (18.15)               | 33531 (14.63)              |
| 10                                | 69027 (38.34)               | 34415 (11.37)               | 38849 (16.95)              |
| <b>Referring physician</b>        |                             |                             |                            |
| No designated                     | 18754 (10.42)               | 20659 (6.83)                | 18183 (7.93)               |
| Designated                        | 161276 (89.58)              | 281904 (93.17)              | 211027 (92.07)             |

*Tables B: Screening uptake multivariable logistic regression models outside the recommended age groups (sequential adjustment)*

| Mammography uptake multivariable logistic regression models (n= 187255): in 40-50 y.o. women (Mammography uptake = 20.77%) |                                           |                         |             |                     |        |                      |        |                      |        |                      |        |                      |        |
|----------------------------------------------------------------------------------------------------------------------------|-------------------------------------------|-------------------------|-------------|---------------------|--------|----------------------|--------|----------------------|--------|----------------------|--------|----------------------|--------|
|                                                                                                                            |                                           |                         | N           | Model 1             | LogLik | Model 2              | LogLik | Model 3              | LogLik | Model 4              | LogLik | Model 5              | LogLik |
|                                                                                                                            |                                           |                         | Tot= 187255 | OR (95%CI)          | -94934 | OR (95%CI)           | -94709 | OR (95%CI)           | -94508 | OR (95%CI)           | -94463 | OR (95%CI)           | -92837 |
| <b>Combined EDI and large urban/other</b>                                                                                  | <b>EDI (deciles) in large urban areas</b> | 1 <sup>1</sup>          | 1284        | 1                   |        | 1                    |        | 1                    |        | 1                    |        | 1                    |        |
|                                                                                                                            |                                           | 2                       | 2737        | 0.899 (0.857,0.944) |        | 0.901 (0.859,0.946)  |        | 0.906 (0.863,0.951)  |        | 0.897 (0.855,0.942)  |        | 0.892 (0.849,0.937)  |        |
|                                                                                                                            |                                           | 3                       | 4550        | 0.845 (0.801,0.892) |        | 0.847 (0.803,0.894)  |        | 0.855 (0.811,0.902)  |        | 0.843 (0.798,0.89)   |        | 0.839 (0.794,0.886)  |        |
|                                                                                                                            |                                           | 4                       | 5726        | 0.836 (0.791,0.884) |        | 0.84 (0.794,0.888)   |        | 0.851 (0.805,0.9)    |        | 0.84 (0.794,0.888)   |        | 0.837 (0.791,0.885)  |        |
|                                                                                                                            |                                           | 5                       | 5472        | 0.745 (0.705,0.788) |        | 0.748 (0.708,0.791)  |        | 0.761 (0.72,0.805)   |        | 0.751 (0.71,0.795)   |        | 0.753 (0.711,0.797)  |        |
|                                                                                                                            |                                           | 6                       | 8525        | 0.722 (0.682,0.764) |        | 0.722 (0.682,0.765)  |        | 0.737 (0.696,0.78)   |        | 0.722 (0.682,0.766)  |        | 0.722 (0.681,0.766)  |        |
|                                                                                                                            |                                           | 7                       | 8283        | 0.688 (0.649,0.73)  |        | 0.69 (0.65,0.731)    |        | 0.705 (0.665,0.748)  |        | 0.699 (0.658,0.742)  |        | 0.71 (0.668,0.754)   |        |
|                                                                                                                            |                                           | 8                       | 8564        | 0.706 (0.665,0.75)  |        | 0.709 (0.668,0.753)  |        | 0.732 (0.689,0.777)  |        | 0.731 (0.687,0.778)  |        | 0.737 (0.693,0.784)  |        |
|                                                                                                                            |                                           | 9                       | 8629        | 0.639 (0.603,0.677) |        | 0.64 (0.604,0.678)   |        | 0.67 (0.632,0.71)    |        | 0.665 (0.625,0.707)  |        | 0.678 (0.638,0.721)  |        |
|                                                                                                                            |                                           | 10                      | 6877        | 0.557 (0.528,0.587) |        | 0.557 (0.528,0.587)  |        | 0.61 (0.578,0.644)   |        | 0.61 (0.575,0.647)   |        | 0.633 (0.596,0.671)  |        |
|                                                                                                                            | <b>EDI (deciles) in other areas</b>       | 1                       | 16751       | 0.57 (0.492,0.66)   |        | 0.569 (0.491,0.66)   |        | 0.572 (0.494,0.663)  |        | 0.599 (0.516,0.694)  |        | 0.598 (0.515,0.694)  |        |
|                                                                                                                            |                                           | 2                       | 17342       | 0.616 (0.557,0.682) |        | 0.615 (0.555,0.681)  |        | 0.619 (0.559,0.686)  |        | 0.634 (0.572,0.702)  |        | 0.635 (0.573,0.704)  |        |
|                                                                                                                            |                                           | 3                       | 12299       | 0.593 (0.546,0.644) |        | 0.592 (0.545,0.643)  |        | 0.597 (0.549,0.648)  |        | 0.62 (0.571,0.674)   |        | 0.623 (0.573,0.678)  |        |
|                                                                                                                            |                                           | 4                       | 10802       | 0.596 (0.553,0.642) |        | 0.595 (0.552,0.641)  |        | 0.602 (0.558,0.649)  |        | 0.613 (0.568,0.661)  |        | 0.614 (0.569,0.663)  |        |
|                                                                                                                            |                                           | 5                       | 11523       | 0.57 (0.528,0.616)  |        | 0.568 (0.526,0.614)  |        | 0.574 (0.531,0.62)   |        | 0.587 (0.543,0.635)  |        | 0.593 (0.548,0.641)  |        |
|                                                                                                                            |                                           | 6                       | 10898       | 0.613 (0.575,0.654) |        | 0.612 (0.574,0.652)  |        | 0.621 (0.582,0.662)  |        | 0.624 (0.585,0.666)  |        | 0.633 (0.593,0.676)  |        |
|                                                                                                                            |                                           | 7                       | 10252       | 0.577 (0.54,0.616)  |        | 0.574 (0.538,0.613)  |        | 0.587 (0.55,0.627)   |        | 0.592 (0.554,0.633)  |        | 0.597 (0.558,0.638)  |        |
|                                                                                                                            |                                           | 8                       | 9432        | 0.53 (0.496,0.566)  |        | 0.528 (0.494,0.564)  |        | 0.543 (0.508,0.581)  |        | 0.55 (0.514,0.588)   |        | 0.555 (0.519,0.594)  |        |
|                                                                                                                            |                                           | 9                       | 11333       | 0.491 (0.459,0.525) |        | 0.49 (0.458,0.524)   |        | 0.507 (0.474,0.543)  |        | 0.505 (0.471,0.541)  |        | 0.511 (0.477,0.548)  |        |
|                                                                                                                            |                                           | 10                      | 15976       | 0.452 (0.419,0.487) |        | 0.45 (0.418,0.485)   |        | 0.476 (0.442,0.513)  |        | 0.479 (0.443,0.517)  |        | 0.486 (0.449,0.525)  |        |
| <b>Age</b>                                                                                                                 |                                           | 40-45 y.o. <sup>1</sup> | 92964       |                     |        | 1                    |        | 1                    |        | 1                    |        | 1                    |        |
|                                                                                                                            |                                           | 45-50 y.o.              | 94291       |                     |        | 1.275 (1.247; 1.305) |        | 1.27 (1.242; 1.299)  |        | 1.271 (1.242; 1.3)   |        | 1.258 (1.229; 1.286) |        |
| <b>CMU-C</b>                                                                                                               |                                           | No <sup>1</sup>         | 172456      |                     |        |                      |        | 1                    |        | 1                    |        | 1                    |        |
|                                                                                                                            |                                           | Yes                     | 14799       |                     |        |                      |        | 0.614 (0.584; 0.645) |        | 0.613 (0.583; 0.645) |        | 0.597 (0.567; 0.627) |        |
| <b>GP PLA (deciles)</b>                                                                                                    |                                           | 1 <sup>1</sup>          | 4959        |                     |        |                      |        |                      |        | 1                    |        | 1                    |        |
|                                                                                                                            |                                           | 2                       | 6486        |                     |        |                      |        |                      |        | 1.091 (0.99; 1.204)  |        | 1.078 (0.978; 1.19)  |        |
|                                                                                                                            |                                           | 3                       | 7123        |                     |        |                      |        |                      |        | 1.064 (0.967; 1.172) |        | 1.067 (0.969; 1.175) |        |
|                                                                                                                            |                                           | 4                       | 10062       |                     |        |                      |        |                      |        | 1.057 (0.966; 1.157) |        | 1.044 (0.954; 1.144) |        |
|                                                                                                                            |                                           | 5                       | 14074       |                     |        |                      |        |                      |        | 1.159 (1.063; 1.264) |        | 1.145 (1.05; 1.249)  |        |
|                                                                                                                            |                                           | 6                       | 17792       |                     |        |                      |        |                      |        | 1.173 (1.078; 1.276) |        | 1.158 (1.064; 1.261) |        |
|                                                                                                                            |                                           | 7                       | 27034       |                     |        |                      |        |                      |        | 1.217 (1.122; 1.321) |        | 1.201 (1.107; 1.305) |        |
|                                                                                                                            |                                           | 8                       | 33101       |                     |        |                      |        |                      |        | 1.262 (1.165; 1.369) |        | 1.247 (1.151; 1.354) |        |
| <b>Referring physician</b>                                                                                                 |                                           | No <sup>1</sup>         | 13378       |                     |        |                      |        |                      |        |                      |        | 1                    |        |
|                                                                                                                            |                                           | Yes                     | 173877      |                     |        |                      |        |                      |        |                      |        | 6.849 (6.275; 7.493) |        |

<sup>1</sup> Reference category

**Mammography uptake multivariable logistic regression models (n= 154895): in > 74 y.o. women (Mammography uptake = 5.65%)**

|                                           |                                           |                         | N           | Model 1             | LogLik               | Model 2             | LogLik               | Model 3             | LogLik               | Model 4             | LogLik               | Model 5             | LogLik |
|-------------------------------------------|-------------------------------------------|-------------------------|-------------|---------------------|----------------------|---------------------|----------------------|---------------------|----------------------|---------------------|----------------------|---------------------|--------|
|                                           |                                           |                         | Tot= 154895 | OR (95%CI)          | -33537               | OR (95%CI)          | -30948               | OR (95%CI)          | -30936               | OR (95%CI)          | -30890               | OR (95%CI)          | -30674 |
| <b>Combined EDI and large urban/other</b> | <b>EDI (deciles) in large urban areas</b> | 1 <sup>2</sup>          | 939         | 1                   |                      | 1                   |                      | 1                   |                      | 1                   |                      | 1                   |        |
|                                           |                                           | 2                       | 2115        | 1.022 (0.904,1.154) |                      | 1.026 (0.906,1.162) |                      | 0.983 (0.95,1.018)  |                      | 0.998 (0.88,1.131)  |                      | 0.994 (0.877,1.127) |        |
|                                           |                                           | 3                       | 3983        | 0.968 (0.849,1.104) |                      | 1.009 (0.883,1.154) |                      | 0.971 (0.934,1.009) |                      | 0.978 (0.855,1.119) |                      | 0.973 (0.85,1.114)  |        |
|                                           |                                           | 4                       | 6092        | 0.921 (0.803,1.055) |                      | 0.921 (0.802,1.058) |                      | 0.939 (0.902,0.976) |                      | 0.883 (0.769,1.015) |                      | 0.88 (0.765,1.011)  |        |
|                                           |                                           | 5                       | 5757        | 0.893 (0.784,1.017) |                      | 0.956 (0.838,1.092) |                      | 0.897 (0.863,0.933) |                      | 0.898 (0.785,1.027) |                      | 0.892 (0.779,1.02)  |        |
|                                           |                                           | 6                       | 9950        | 0.891 (0.784,1.013) |                      | 0.945 (0.829,1.077) |                      | 0.936 (0.901,0.973) |                      | 0.878 (0.769,1.002) |                      | 0.873 (0.765,0.997) |        |
|                                           |                                           | 7                       | 10334       | 0.896 (0.789,1.019) |                      | 0.973 (0.854,1.108) |                      | 0.858 (0.825,0.892) |                      | 0.88 (0.77,1.006)   |                      | 0.879 (0.769,1.005) |        |
|                                           |                                           | 8                       | 10647       | 0.99 (0.873,1.123)  |                      | 1.088 (0.957,1.238) |                      | 0.885 (0.85,0.922)  |                      | 0.987 (0.865,1.127) |                      | 0.982 (0.86,1.121)  |        |
|                                           |                                           | 9                       | 10974       | 0.926 (0.821,1.044) |                      | 1.029 (0.911,1.163) |                      | 0.855 (0.823,0.888) |                      | 0.89 (0.782,1.012)  |                      | 0.886 (0.779,1.008) |        |
|                                           |                                           | 10                      | 9307        | 0.899 (0.802,1.007) |                      | 0.977 (0.87,1.097)  |                      | 0.763 (0.737,0.79)  |                      | 0.837 (0.74,0.948)  |                      | 0.835 (0.738,0.946) |        |
|                                           | <b>EDI (deciles) in other</b>             | 1                       | 7482        | 0.77 (0.572,1.039)  |                      | 0.765 (0.565,1.035) |                      | 0.784 (0.719,0.855) |                      | 0.793 (0.584,1.075) |                      | 0.786 (0.579,1.066) |        |
|                                           |                                           | 2                       | 8759        | 0.78 (0.633,0.962)  |                      | 0.767 (0.62,0.948)  |                      | 0.845 (0.795,0.897) |                      | 0.791 (0.64,0.979)  |                      | 0.782 (0.632,0.968) |        |
|                                           |                                           | 3                       | 6862        | 0.701 (0.592,0.831) |                      | 0.708 (0.596,0.841) |                      | 0.817 (0.778,0.858) |                      | 0.742 (0.623,0.882) |                      | 0.733 (0.616,0.872) |        |
|                                           |                                           | 4                       | 6193        | 0.645 (0.555,0.75)  |                      | 0.671 (0.576,0.782) |                      | 0.833 (0.797,0.871) |                      | 0.662 (0.568,0.772) |                      | 0.659 (0.565,0.769) |        |
|                                           |                                           | 5                       | 7566        | 0.539 (0.458,0.634) |                      | 0.552 (0.468,0.65)  |                      | 0.78 (0.746,0.817)  |                      | 0.55 (0.466,0.649)  |                      | 0.547 (0.463,0.646) |        |
|                                           |                                           | 6                       | 8023        | 0.696 (0.612,0.791) |                      | 0.726 (0.637,0.827) |                      | 0.838 (0.805,0.871) |                      | 0.692 (0.607,0.79)  |                      | 0.686 (0.601,0.783) |        |
|                                           |                                           | 7                       | 8076        | 0.65 (0.571,0.739)  |                      | 0.696 (0.61,0.794)  |                      | 0.824 (0.792,0.857) |                      | 0.657 (0.575,0.751) |                      | 0.65 (0.569,0.743)  |        |
|                                           |                                           | 8                       | 7774        | 0.728 (0.642,0.825) |                      | 0.774 (0.681,0.878) |                      | 0.833 (0.802,0.866) |                      | 0.727 (0.638,0.828) |                      | 0.717 (0.629,0.816) |        |
|                                           |                                           | 9                       | 10269       | 0.706 (0.623,0.8)   |                      | 0.776 (0.683,0.881) |                      | 0.762 (0.733,0.792) |                      | 0.728 (0.64,0.829)  |                      | 0.72 (0.632,0.82)   |        |
|                                           |                                           | 10                      | 13793       | 0.693 (0.608,0.79)  |                      | 0.757 (0.663,0.864) |                      | 0.718 (0.688,0.75)  |                      | 0.675 (0.588,0.775) |                      | 0.666 (0.58,0.765)  |        |
|                                           | <b>Age</b>                                | 75-80 y.o. <sup>2</sup> | 50815       |                     |                      | 1                   |                      | 1                   |                      | 1                   |                      | 1                   |        |
| 80-85 y.o.                                |                                           | 48148                   |             |                     | 0.387 (0.368; 0.407) |                     | 0.387 (0.368; 0.407) |                     | 0.386 (0.367; 0.406) |                     | 0.385 (0.366; 0.405) |                     |        |
| 85-90 y.o.                                |                                           | 34698                   |             |                     | 0.152 (0.14; 0.165)  |                     | 0.152 (0.14; 0.165)  |                     | 0.151 (0.139; 0.164) |                     | 0.151 (0.139; 0.164) |                     |        |
| 90-95 y.o.                                |                                           | 16602                   |             |                     | 0.067 (0.057; 0.079) |                     | 0.067 (0.057; 0.079) |                     | 0.067 (0.056; 0.079) |                     | 0.067 (0.056; 0.079) |                     |        |
| 95-100 y.o.                               |                                           | 4632                    |             |                     | 0.024 (0.013; 0.038) |                     | 0.024 (0.013; 0.038) |                     | 0.023 (0.013; 0.038) |                     | 0.025 (0.014; 0.04)  |                     |        |
| <b>CMU-C</b>                              | No <sup>2</sup>                           | 153807                  |             |                     |                      |                     | 1                    |                     | 1                    |                     | 1                    |                     |        |
|                                           | Yes                                       | 1088                    |             |                     |                      |                     | 0.443 (0.298; 0.63)  |                     | 0.443 (0.298; 0.63)  |                     | 0.439 (0.295; 0.625) |                     |        |
| <b>GP PLA (deciles)</b>                   | 1 <sup>2</sup>                            | 4675                    |             |                     |                      |                     |                      |                     | 1                    |                     | 1                    |                     |        |
|                                           | 2                                         | 5726                    |             |                     |                      |                     |                      |                     | 1.14 (0.94; 1.386)   |                     | 1.138 (0.938; 1.383) |                     |        |
|                                           | 3                                         | 5537                    |             |                     |                      |                     |                      |                     | 1.037 (0.851; 1.265) |                     | 1.035 (0.85; 1.263)  |                     |        |
|                                           | 4                                         | 7717                    |             |                     |                      |                     |                      |                     | 1.091 (0.909; 1.314) |                     | 1.085 (0.904; 1.306) |                     |        |
|                                           | 5                                         | 9569                    |             |                     |                      |                     |                      |                     | 1.171 (0.983; 1.399) |                     | 1.17 (0.983; 1.399)  |                     |        |
|                                           | 6                                         | 11747                   |             |                     |                      |                     |                      |                     | 1.25 (1.056; 1.486)  |                     | 1.25 (1.055; 1.486)  |                     |        |
|                                           | 7                                         | 18800                   |             |                     |                      |                     |                      |                     | 1.316 (1.12; 1.554)  |                     | 1.312 (1.117; 1.549) |                     |        |
|                                           | 8                                         | 25658                   |             |                     |                      |                     |                      |                     | 1.441 (1.231; 1.694) |                     | 1.44 (1.231; 1.695)  |                     |        |
|                                           | 9                                         | 30207                   |             |                     |                      |                     |                      |                     | 1.398 (1.195; 1.644) |                     | 1.403 (1.199; 1.65)  |                     |        |
|                                           | 10                                        | 35259                   |             |                     |                      |                     |                      |                     | 1.546 (1.322; 1.818) |                     | 1.555 (1.329; 1.829) |                     |        |
| <b>Referring physician</b>                | No <sup>2</sup>                           | 5992                    |             |                     |                      |                     |                      |                     |                      |                     | 1                    |                     |        |
|                                           | Yes                                       | 148903                  |             |                     |                      |                     |                      |                     |                      |                     | 8.938 (6.66; 12.37)  |                     |        |

<sup>2</sup> Reference category

1  
2  
3  
4  
5  
6  
7  
8  
9  
10  
11  
12  
13  
14  
15  
16  
17  
18  
19  
20  
21  
22  
23  
24  
25  
26  
27  
28  
29  
30  
31  
32  
33  
34  
35  
36  
37  
38  
39  
40  
41  
42  
43  
44  
45  
46

| Pap smear uptake multivariable logistic regression models (n= 63068) in 20-25 y.o. women (Pap smear uptake = 20.58 %) |                                           |                |            |                      |                      |                      |                      |                      |            |        |            |        |
|-----------------------------------------------------------------------------------------------------------------------|-------------------------------------------|----------------|------------|----------------------|----------------------|----------------------|----------------------|----------------------|------------|--------|------------|--------|
|                                                                                                                       |                                           | N              | Model 1    | LogLik               | Model 2              | LogLik               | Model 3              | LogLik               | Model 4    | LogLik | Model 5    | LogLik |
|                                                                                                                       |                                           | Tot= 63068     | OR (95%CI) | -31988               | OR (95%CI)           | -31676               | OR (95%CI)           | -31675               | OR (95%CI) | -31670 | OR (95%CI) | -30989 |
| <b>Combined EDI and large urban/other</b>                                                                             | <b>EDI (deciles) in large urban areas</b> | 1 <sup>3</sup> | 272        | 1                    | 1                    | 1                    | 1                    | 1                    | 1          | 1      | 1          | 1      |
|                                                                                                                       |                                           | 2              | 600        | 0.958 (0.864; 1.062) | 0.951 (0.858; 1.056) | 0.952 (0.859; 1.057) | 0.956 (0.861; 1.062) | 0.941 (0.846; 1.046) |            |        |            |        |
|                                                                                                                       |                                           | 3              | 1047       | 0.992 (0.888; 1.108) | 0.985 (0.881; 1.101) | 0.987 (0.882; 1.103) | 0.987 (0.882; 1.105) | 0.975 (0.87; 1.093)  |            |        |            |        |
|                                                                                                                       |                                           | 4              | 1451       | 1.024 (0.914; 1.146) | 1.021 (0.911; 1.143) | 1.022 (0.913; 1.145) | 1.029 (0.918; 1.154) | 1.021 (0.91; 1.146)  |            |        |            |        |
|                                                                                                                       |                                           | 5              | 1412       | 0.915 (0.823; 1.017) | 0.905 (0.813; 1.007) | 0.907 (0.815; 1.009) | 0.922 (0.827; 1.028) | 0.921 (0.825; 1.028) |            |        |            |        |
|                                                                                                                       |                                           | 6              | 2197       | 0.896 (0.803; 0.999) | 0.889 (0.797; 0.992) | 0.892 (0.799; 0.995) | 0.903 (0.808; 1.009) | 0.895 (0.8; 1.002)   |            |        |            |        |
|                                                                                                                       |                                           | 7              | 2336       | 0.92 (0.828; 1.023)  | 0.901 (0.81; 1.002)  | 0.903 (0.812; 1.005) | 0.923 (0.827; 1.03)  | 0.94 (0.841; 1.05)   |            |        |            |        |
|                                                                                                                       |                                           | 8              | 2376       | 0.917 (0.824; 1.02)  | 0.895 (0.804; 0.997) | 0.898 (0.806; 1)     | 0.925 (0.828; 1.033) | 0.938 (0.838; 1.049) |            |        |            |        |
|                                                                                                                       |                                           | 9              | 2575       | 0.824 (0.746; 0.909) | 0.801 (0.726; 0.885) | 0.804 (0.728; 0.889) | 0.834 (0.751; 0.927) | 0.858 (0.771; 0.954) |            |        |            |        |
|                                                                                                                       |                                           | 10             | 2484       | 0.735 (0.67; 0.808)  | 0.733 (0.667; 0.805) | 0.739 (0.672; 0.812) | 0.772 (0.697; 0.856) | 0.802 (0.722; 0.89)  |            |        |            |        |
|                                                                                                                       | <b>EDI (deciles) in other areas</b>       | 1              | 3700       | 0.696 (0.498; 0.953) | 0.701 (0.501; 0.961) | 0.701 (0.501; 0.962) | 0.701 (0.5; 0.962)   | 0.729 (0.519; 1.005) |            |        |            |        |
|                                                                                                                       |                                           | 2              | 4599       | 0.895 (0.723; 1.101) | 0.903 (0.729; 1.112) | 0.903 (0.729; 1.113) | 0.904 (0.729; 1.114) | 0.902 (0.726; 1.114) |            |        |            |        |
|                                                                                                                       |                                           | 3              | 3387       | 0.938 (0.794; 1.105) | 0.956 (0.809; 1.127) | 0.957 (0.809; 1.128) | 0.964 (0.814; 1.138) | 0.963 (0.812; 1.139) |            |        |            |        |
|                                                                                                                       |                                           | 4              | 3098       | 0.779 (0.669; 0.906) | 0.78 (0.669; 0.908)  | 0.781 (0.67; 0.909)  | 0.788 (0.675; 0.917) | 0.784 (0.671; 0.914) |            |        |            |        |
|                                                                                                                       |                                           | 5              | 4188       | 0.846 (0.727; 0.983) | 0.852 (0.731; 0.99)  | 0.853 (0.732; 0.992) | 0.859 (0.736; 0.999) | 0.849 (0.727; 0.989) |            |        |            |        |
|                                                                                                                       |                                           | 6              | 3814       | 0.839 (0.737; 0.955) | 0.849 (0.745; 0.966) | 0.85 (0.746; 0.967)  | 0.858 (0.752; 0.977) | 0.849 (0.744; 0.969) |            |        |            |        |
|                                                                                                                       |                                           | 7              | 4205       | 0.835 (0.735; 0.948) | 0.838 (0.737; 0.951) | 0.84 (0.739; 0.954)  | 0.855 (0.751; 0.972) | 0.837 (0.735; 0.954) |            |        |            |        |
|                                                                                                                       |                                           | 8              | 4074       | 0.77 (0.677; 0.875)  | 0.776 (0.682; 0.882) | 0.778 (0.683; 0.885) | 0.789 (0.692; 0.899) | 0.78 (0.683; 0.89)   |            |        |            |        |
|                                                                                                                       |                                           | 9              | 6237       | 0.797 (0.704; 0.902) | 0.809 (0.713; 0.916) | 0.812 (0.716; 0.919) | 0.823 (0.725; 0.934) | 0.826 (0.726; 0.939) |            |        |            |        |
|                                                                                                                       |                                           | 10             | 9016       | 0.655 (0.574; 0.746) | 0.661 (0.579; 0.754) | 0.665 (0.582; 0.758) | 0.688 (0.6; 0.787)   | 0.701 (0.61; 0.803)  |            |        |            |        |
| <b>Age</b>                                                                                                            | 20-21y.o. <sup>3</sup>                    | 9827           |            | 1                    | 1                    | 1                    | 1                    | 1                    |            |        |            |        |
|                                                                                                                       | 21-22 y.o.                                | 11080          |            | 1.234 (1.144; 1.33)  | 1.233 (1.144; 1.33)  | 1.234 (1.144; 1.33)  | 1.205 (1.117; 1.3)   |                      |            |        |            |        |
|                                                                                                                       | 22-23 y.o.                                | 12631          |            | 1.516 (1.411; 1.628) | 1.514 (1.41; 1.626)  | 1.516 (1.412; 1.628) | 1.435 (1.335; 1.543) |                      |            |        |            |        |
|                                                                                                                       | 23-24 y.o.                                | 14064          |            | 1.709 (1.595; 1.832) | 1.707 (1.593; 1.83)  | 1.711 (1.597; 1.834) | 1.576 (1.47; 1.691)  |                      |            |        |            |        |
|                                                                                                                       | 24-25 y.o.                                | 15466          |            | 2.102 (1.966; 2.249) | 2.099 (1.963; 2.246) | 2.104 (1.967; 2.25)  | 1.912 (1.787; 2.047) |                      |            |        |            |        |
| <b>CMU-C</b>                                                                                                          | No <sup>3</sup>                           | 54768          |            |                      | 1                    | 1                    | 1                    |                      |            |        |            |        |
|                                                                                                                       | Yes                                       | 8300           |            |                      | 0.968 (0.911; 1.028) | 0.969 (0.912; 1.029) | 0.899 (0.845; 0.955) |                      |            |        |            |        |
| <b>GP PLA (deciles)</b>                                                                                               | 1 <sup>3</sup>                            | 1167           |            |                      |                      | 1                    | 1                    |                      |            |        |            |        |
|                                                                                                                       | 2                                         | 1569           |            |                      |                      | 1.057 (0.873; 1.281) | 1.033 (0.851; 1.254) |                      |            |        |            |        |
|                                                                                                                       | 3                                         | 1626           |            |                      |                      | 1.09 (0.903; 1.318)  | 1.069 (0.884; 1.295) |                      |            |        |            |        |
|                                                                                                                       | 4                                         | 2498           |            |                      |                      | 1.096 (0.92; 1.307)  | 1.075 (0.902; 1.285) |                      |            |        |            |        |
|                                                                                                                       | 5                                         | 3594           |            |                      |                      | 1.07 (0.906; 1.268)  | 1.055 (0.891; 1.252) |                      |            |        |            |        |
|                                                                                                                       | 6                                         | 4813           |            |                      |                      | 1.026 (0.872; 1.21)  | 1.018 (0.864; 1.203) |                      |            |        |            |        |
|                                                                                                                       | 7                                         | 7959           |            |                      |                      | 1.055 (0.902; 1.238) | 1.039 (0.887; 1.222) |                      |            |        |            |        |
|                                                                                                                       | 8                                         | 10982          |            |                      |                      | 1.074 (0.92; 1.257)  | 1.054 (0.902; 1.236) |                      |            |        |            |        |
|                                                                                                                       | 9                                         | 12533          |            |                      |                      | 1.021 (0.875; 1.196) | 1.011 (0.865; 1.186) |                      |            |        |            |        |
|                                                                                                                       | 10                                        | 16327          |            |                      |                      | 0.986 (0.845; 1.155) | 1.004 (0.859; 1.178) |                      |            |        |            |        |
| <b>Referring physician</b>                                                                                            | No <sup>3</sup>                           | 13716          |            |                      |                      |                      | 1                    |                      |            |        |            |        |
|                                                                                                                       | Yes                                       | 49352          |            |                      |                      |                      | 2.859 (2.69; 3.042)  |                      |            |        |            |        |

<sup>3</sup> Reference category

| Pap smear uptake multivariable logistic regression models (n= 252156) in > 65 y.o. women (Pap smear uptake = 5.69%) |                                           |                                     |                     |                     |                      |                     |                      |                      |                      |                     |                       |                     |  |
|---------------------------------------------------------------------------------------------------------------------|-------------------------------------------|-------------------------------------|---------------------|---------------------|----------------------|---------------------|----------------------|----------------------|----------------------|---------------------|-----------------------|---------------------|--|
|                                                                                                                     |                                           | N                                   | Model 1             | LogLik              | Model 2              | LogLik              | Model 3              | LogLik               | Model 4              | LogLik              | Model 5               | LogLik              |  |
|                                                                                                                     |                                           | Tot= 252156                         | OR (95%CI)          | -54676              | OR (95%CI)           | -48204              | OR (95%CI)           | -48196               | OR (95%CI)           | -48125              | OR (95%CI)            | -47675              |  |
| <b>Combined EDI and large urban/other areas</b>                                                                     | <b>EDI (deciles) in large urban areas</b> | 1 <sup>4</sup>                      | 1                   |                     | 1                    |                     | 1                    |                      | 1                    |                     | 1                     |                     |  |
|                                                                                                                     |                                           | 2                                   | 0.875 (0.805,0.951) |                     | 0.904 (0.83,0.985)   |                     | 0.905 (0.83,0.985)   |                      | 0.874 (0.801,0.953)  |                     | 0.865 (0.793,0.944)   |                     |  |
|                                                                                                                     |                                           | 3                                   | 0.822 (0.75,0.901)  |                     | 0.903 (0.821,0.992)  |                     | 0.903 (0.821,0.992)  |                      | 0.874 (0.795,0.961)  |                     | 0.866 (0.787,0.953)   |                     |  |
|                                                                                                                     |                                           | 4                                   | 0.786 (0.714,0.865) |                     | 0.859 (0.779,0.948)  |                     | 0.86 (0.78,0.949)    |                      | 0.825 (0.748,0.911)  |                     | 0.817 (0.74,0.902)    |                     |  |
|                                                                                                                     |                                           | 5                                   | 0.743 (0.677,0.815) |                     | 0.858 (0.78,0.944)   |                     | 0.859 (0.782,0.945)  |                      | 0.809 (0.735,0.891)  |                     | 0.805 (0.731,0.887)   |                     |  |
|                                                                                                                     |                                           | 6                                   | 0.641 (0.584,0.705) |                     | 0.738 (0.669,0.813)  |                     | 0.738 (0.67,0.813)   |                      | 0.687 (0.622,0.758)  |                     | 0.679 (0.615,0.749)   |                     |  |
|                                                                                                                     |                                           | 7                                   | 0.69 (0.628,0.757)  |                     | 0.833 (0.757,0.917)  |                     | 0.834 (0.757,0.918)  |                      | 0.763 (0.691,0.842)  |                     | 0.764 (0.692,0.843)   |                     |  |
|                                                                                                                     |                                           | 8                                   | 0.796 (0.727,0.872) |                     | 0.982 (0.894,1.079)  |                     | 0.984 (0.895,1.081)  |                      | 0.898 (0.815,0.99)   |                     | 0.895 (0.812,0.987)   |                     |  |
|                                                                                                                     |                                           | 9                                   | 0.685 (0.628,0.748) |                     | 0.855 (0.781,0.936)  |                     | 0.858 (0.784,0.94)   |                      | 0.748 (0.68,0.823)   |                     | 0.745 (0.677,0.82)    |                     |  |
|                                                                                                                     |                                           | 10                                  | 0.647 (0.596,0.702) |                     | 0.789 (0.725,0.858)  |                     | 0.795 (0.73,0.865)   |                      | 0.68 (0.621,0.745)   |                     | 0.678 (0.619,0.743)   |                     |  |
|                                                                                                                     |                                           | <b>EDI (deciles) in other areas</b> | 1                   | 0.641 (0.517,0.795) |                      | 0.669 (0.537,0.834) |                      | 0.668 (0.536,0.833)  |                      | 0.693 (0.555,0.865) |                       | 0.687 (0.55,0.858)  |  |
|                                                                                                                     |                                           |                                     | 2                   | 0.571 (0.488,0.669) |                      | 0.6 (0.511,0.705)   |                      | 0.6 (0.511,0.704)    |                      | 0.616 (0.524,0.724) |                       | 0.607 (0.516,0.714) |  |
|                                                                                                                     |                                           |                                     | 3                   | 0.556 (0.49,0.63)   |                      | 0.616 (0.542,0.7)   |                      | 0.616 (0.542,0.7)    |                      | 0.635 (0.558,0.723) |                       | 0.628 (0.551,0.715) |  |
|                                                                                                                     |                                           |                                     | 4                   | 0.522 (0.467,0.583) |                      | 0.61 (0.545,0.683)  |                      | 0.61 (0.545,0.683)   |                      | 0.603 (0.538,0.676) |                       | 0.596 (0.532,0.668) |  |
|                                                                                                                     |                                           |                                     | 5                   | 0.456 (0.405,0.513) |                      | 0.524 (0.464,0.591) |                      | 0.524 (0.464,0.591)  |                      | 0.526 (0.466,0.594) |                       | 0.519 (0.459,0.586) |  |
|                                                                                                                     |                                           |                                     | 6                   | 0.5 (0.454,0.55)    |                      | 0.598 (0.542,0.659) |                      | 0.598 (0.542,0.659)  |                      | 0.577 (0.522,0.637) |                       | 0.569 (0.515,0.629) |  |
|                                                                                                                     |                                           |                                     | 7                   | 0.497 (0.452,0.547) |                      | 0.599 (0.544,0.66)  |                      | 0.6 (0.544,0.661)    |                      | 0.572 (0.518,0.631) |                       | 0.564 (0.511,0.623) |  |
|                                                                                                                     |                                           |                                     | 8                   | 0.508 (0.463,0.558) |                      | 0.612 (0.556,0.673) |                      | 0.612 (0.556,0.674)  |                      | 0.579 (0.525,0.639) |                       | 0.57 (0.516,0.629)  |  |
|                                                                                                                     |                                           |                                     | 9                   | 0.436 (0.396,0.481) |                      | 0.535 (0.484,0.591) |                      | 0.535 (0.485,0.591)  |                      | 0.503 (0.454,0.556) |                       | 0.495 (0.447,0.548) |  |
|                                                                                                                     |                                           |                                     | 10                  | 0.461 (0.416,0.51)  |                      | 0.587 (0.529,0.651) |                      | 0.589 (0.53,0.653)   |                      | 0.528 (0.474,0.588) |                       | 0.519 (0.466,0.578) |  |
| <b>Age</b>                                                                                                          |                                           | 65-70 y.o. <sup>4</sup>             | 48684               |                     | 1                    |                     | 1                    |                      | 1                    |                     | 1                     |                     |  |
|                                                                                                                     |                                           | 70-75 y.o.                          | 48577               |                     | 0.583 (0.56; 0.607)  |                     | 0.582 (0.559; 0.606) |                      | 0.581 (0.558; 0.605) |                     | 0.578 (0.555; 0.601)  |                     |  |
|                                                                                                                     |                                           | 75-80 y.o.                          | 50815               |                     | 0.252 (0.24; 0.266)  |                     | 0.252 (0.239; 0.265) |                      | 0.251 (0.238; 0.264) |                     | 0.247 (0.234; 0.26)   |                     |  |
|                                                                                                                     |                                           | 80-85 y.o.                          | 48148               |                     | 0.094 (0.087; 0.102) |                     | 0.094 (0.087; 0.101) |                      | 0.093 (0.086; 0.101) |                     | 0.092 (0.085; 0.099)  |                     |  |
|                                                                                                                     |                                           | 85-90 y.o.                          | 34698               |                     | 0.03 (0.026; 0.035)  |                     | 0.03 (0.026; 0.035)  |                      | 0.03 (0.026; 0.035)  |                     | 0.029 (0.025; 0.034)  |                     |  |
|                                                                                                                     |                                           | 90-95 y.o.                          | 16602               |                     | 0.013 (0.01; 0.018)  |                     | 0.013 (0.01; 0.018)  |                      | 0.013 (0.009; 0.018) |                     | 0.013 (0.009; 0.018)  |                     |  |
| <b>CMU-C</b>                                                                                                        |                                           | 95-100 y.o.                         | 4632                |                     | 0.005 (0.002; 0.012) |                     | 0.005 (0.002; 0.012) |                      | 0.005 (0.002; 0.012) |                     | 0.005 (0.002; 0.012)  |                     |  |
|                                                                                                                     |                                           | No <sup>4</sup>                     | 249945              |                     |                      |                     | 1                    |                      | 1                    |                     | 1                     |                     |  |
|                                                                                                                     | Yes                                       | 2211                                |                     |                     |                      | 0.68 (0.558; 0.821) |                      | 0.676 (0.555; 0.816) |                      | 0.67 (0.55; 0.809)  |                       |                     |  |
| <b>GP PLA (deciles)</b>                                                                                             |                                           | 1 <sup>4</sup>                      | 7805                |                     |                      |                     |                      |                      | 1                    |                     | 1                     |                     |  |
|                                                                                                                     |                                           | 2                                   | 9343                |                     |                      |                     |                      |                      | 0.85 (0.731; 0.989)  |                     | 0.842 (0.724; 0.98)   |                     |  |
|                                                                                                                     |                                           | 3                                   | 9254                |                     |                      |                     |                      |                      | 0.885 (0.763; 1.028) |                     | 0.886 (0.763; 1.029)  |                     |  |
|                                                                                                                     |                                           | 4                                   | 12955               |                     |                      |                     |                      |                      | 1.004 (0.877; 1.151) |                     | 0.995 (0.869; 1.141)  |                     |  |
|                                                                                                                     |                                           | 5                                   | 16421               |                     |                      |                     |                      |                      | 1.054 (0.927; 1.202) |                     | 1.053 (0.926; 1.201)  |                     |  |
|                                                                                                                     |                                           | 6                                   | 19914               |                     |                      |                     |                      |                      | 1.088 (0.96; 1.237)  |                     | 1.08 (0.952; 1.227)   |                     |  |
|                                                                                                                     |                                           | 7                                   | 31912               |                     |                      |                     |                      |                      | 1.147 (1.017; 1.296) |                     | 1.14 (1.011; 1.289)   |                     |  |
|                                                                                                                     |                                           | 8                                   | 42273               |                     |                      |                     |                      |                      | 1.223 (1.087; 1.379) |                     | 1.214 (1.08; 1.37)    |                     |  |
|                                                                                                                     |                                           | 9                                   | 47761               |                     |                      |                     |                      |                      | 1.282 (1.14; 1.446)  |                     | 1.282 (1.14; 1.446)   |                     |  |
|                                                                                                                     |                                           | 10                                  | 54518               |                     |                      |                     |                      |                      | 1.319 (1.173; 1.488) |                     | 1.327 (1.179; 1.497)  |                     |  |
| <b>Referring physician</b>                                                                                          |                                           | No <sup>4</sup>                     | 10487               |                     |                      |                     |                      |                      |                      |                     | 1                     |                     |  |
|                                                                                                                     |                                           | Yes                                 | 241669              |                     |                      |                     |                      |                      |                      |                     | 9.629 (7.764; 12.133) |                     |  |

<sup>4</sup> Reference category

1  
2  
3  
4  
5  
6  
7  
8  
9  
10  
11  
12  
13  
14  
15  
16  
17  
18  
19  
20  
21  
22  
23  
24  
25  
26  
27  
28  
29  
30  
31  
32  
33  
34  
35  
36  
37  
38  
39  
40  
41  
42  
43  
44  
45  
46

For peer review only



STROBE Statement—checklist of items included in the study “Social and territorial inequalities in gynaecological cancers screening uptake in France”

|                              | Item No | Recommendation                                                                                                                                                                                                                                                                                                                                                                                                                                                         |   | Page number |
|------------------------------|---------|------------------------------------------------------------------------------------------------------------------------------------------------------------------------------------------------------------------------------------------------------------------------------------------------------------------------------------------------------------------------------------------------------------------------------------------------------------------------|---|-------------|
| <b>Title and abstract</b>    | 1       | (a) Indicate the study’s design with a commonly used term in the title or the abstract                                                                                                                                                                                                                                                                                                                                                                                 | X | 1           |
|                              |         | (b) Provide in the abstract an informative and balanced summary of what was done and what was found                                                                                                                                                                                                                                                                                                                                                                    | X | 2           |
| <b>Introduction</b>          |         |                                                                                                                                                                                                                                                                                                                                                                                                                                                                        |   |             |
| Background/rationale         | 2       | Explain the scientific background and rationale for the investigation being reported                                                                                                                                                                                                                                                                                                                                                                                   | X | 5           |
| Objectives                   | 3       | State specific objectives, including any prespecified hypotheses                                                                                                                                                                                                                                                                                                                                                                                                       | X | 5           |
| <b>Methods</b>               |         |                                                                                                                                                                                                                                                                                                                                                                                                                                                                        |   |             |
| Study design                 | 4       | Present key elements of study design early in the paper                                                                                                                                                                                                                                                                                                                                                                                                                | X | 6           |
| Setting                      | 5       | Describe the setting, locations, and relevant dates, including periods of recruitment, exposure, follow-up, and data collection                                                                                                                                                                                                                                                                                                                                        | X | 6           |
| Participants                 | 6       | (a) <i>Cohort study</i> —Give the eligibility criteria, and the sources and methods of selection of participants. Describe methods of follow-up<br><i>Case-control study</i> —Give the eligibility criteria, and the sources and methods of case ascertainment and control selection. Give the rationale for the choice of cases and controls<br><i>Cross-sectional study</i> —Give the eligibility criteria, and the sources and methods of selection of participants | X | 6           |
|                              |         | (b) <i>Cohort study</i> —For matched studies, give matching criteria and number of exposed and unexposed<br><i>Case-control study</i> —For matched studies, give matching criteria and the number of controls per case                                                                                                                                                                                                                                                 |   |             |
| Variables                    | 7       | Clearly define all outcomes, exposures, predictors, potential confounders, and effect modifiers. Give diagnostic criteria, if applicable                                                                                                                                                                                                                                                                                                                               | X | 6-8         |
| Data sources/<br>measurement | 8*      | For each variable of interest, give sources of data and details of methods of assessment (measurement). Describe comparability of assessment methods if there is more than one group                                                                                                                                                                                                                                                                                   | X | 6-8         |
| Bias                         | 9       | Describe any efforts to address potential sources of bias                                                                                                                                                                                                                                                                                                                                                                                                              | X | 6-9         |
| Study size                   | 10      | Explain how the study size was arrived at                                                                                                                                                                                                                                                                                                                                                                                                                              | X | 6           |
| Quantitative<br>variables    | 11      | Explain how quantitative variables were handled in the analyses. If applicable, describe which groupings were chosen and why                                                                                                                                                                                                                                                                                                                                           | X | 6-8         |
| Statistical methods          | 12      | (a) Describe all statistical methods, including those used to control for confounding                                                                                                                                                                                                                                                                                                                                                                                  | X | 8-9         |
|                              |         | (b) Describe any methods used to examine subgroups and interactions                                                                                                                                                                                                                                                                                                                                                                                                    | X | 9           |
|                              |         | (c) Explain how missing data were addressed                                                                                                                                                                                                                                                                                                                                                                                                                            | X | 9           |
|                              |         | (d) <i>Cohort study</i> —If applicable, explain how loss to follow-up was addressed<br><i>Case-control study</i> —If applicable, explain how matching of cases and controls was addressed<br><i>Cross-sectional study</i> —If applicable, describe analytical methods taking account of sampling strategy                                                                                                                                                              |   |             |
|                              |         | (e) Describe any sensitivity analyses                                                                                                                                                                                                                                                                                                                                                                                                                                  |   |             |

| <b>Results</b>           |     |                                                                                                                                                                                                              |   |                                      |
|--------------------------|-----|--------------------------------------------------------------------------------------------------------------------------------------------------------------------------------------------------------------|---|--------------------------------------|
| Participants             | 13* | (a) Report numbers of individuals at each stage of study—eg numbers potentially eligible, examined for eligibility, confirmed eligible, included in the study, completing follow-up, and analysed            | X | 7+10                                 |
|                          |     | (b) Give reasons for non-participation at each stage                                                                                                                                                         | X | 6+9                                  |
|                          |     | (c) Consider use of a flow diagram                                                                                                                                                                           | X | 9 (no figure)                        |
| Descriptive data         | 14* | (a) Give characteristics of study participants (eg demographic, clinical, social) and information on exposures and potential confounders                                                                     | X | 9-10 + table 1 + suppl. Tables A     |
|                          |     | (b) Indicate number of participants with missing data for each variable of interest                                                                                                                          | X | 9                                    |
|                          |     | (c) <i>Cohort study</i> —Summarise follow-up time (eg, average and total amount)                                                                                                                             |   |                                      |
| Outcome data             | 15* | <i>Cohort study</i> —Report numbers of outcome events or summary measures over time                                                                                                                          |   |                                      |
|                          |     | <i>Case-control study</i> —Report numbers in each exposure category, or summary measures of exposure                                                                                                         |   |                                      |
|                          |     | <i>Cross-sectional study</i> —Report numbers of outcome events or summary measures                                                                                                                           | X | 10-11 + Table 1                      |
| Main results             | 16  | (a) Give unadjusted estimates and, if applicable, confounder-adjusted estimates and their precision (eg, 95% confidence interval). Make clear which confounders were adjusted for and why they were included | X | 10-11+ Tables 2/3                    |
|                          |     | (b) Report category boundaries when continuous variables were categorized                                                                                                                                    | X | 8-10 + Tables 2/3                    |
|                          |     | (c) If relevant, consider translating estimates of relative risk into absolute risk for a meaningful time period                                                                                             |   |                                      |
| Other analyses           | 17  | Report other analyses done—eg analyses of subgroups and interactions, and sensitivity analyses                                                                                                               | X | 12-13 + Tables 2/3 + Suppl. Tables B |
| <b>Discussion</b>        |     |                                                                                                                                                                                                              |   |                                      |
| Key results              | 18  | Summarise key results with reference to study objectives                                                                                                                                                     | X | 16                                   |
| Limitations              | 19  | Discuss limitations of the study, taking into account sources of potential bias or imprecision. Discuss both direction and magnitude of any potential bias                                                   | X | 16                                   |
| Interpretation           | 20  | Give a cautious overall interpretation of results considering objectives, limitations, multiplicity of analyses, results from similar studies, and other relevant evidence                                   | X | 16-19                                |
| Generalisability         | 21  | Discuss the generalisability (external validity) of the study results                                                                                                                                        | X | 16-19                                |
| <b>Other information</b> |     |                                                                                                                                                                                                              |   |                                      |
| Funding                  | 22  | Give the source of funding and the role of the funders for the present study and, if applicable, for the original study on which the present article is based                                                | X | 21                                   |

\*Give information separately for cases and controls in case-control studies and, if applicable, for exposed and unexposed groups in cohort and cross-sectional studies.

**Note:** An Explanation and Elaboration article discusses each checklist item and gives methodological background and published examples of transparent reporting. The STROBE checklist is best used in conjunction with this article (freely available on the Web sites of PLoS Medicine at <http://www.plosmedicine.org/>, Annals of Internal Medicine at

1  
2 <http://www.annals.org/>, and *Epidemiology* at <http://www.epidem.com/>). Information on the STROBE Initiative is  
3 available at [www.strobe-statement.org](http://www.strobe-statement.org).  
4  
5  
6  
7  
8  
9  
10  
11  
12  
13  
14  
15  
16  
17  
18  
19  
20  
21  
22  
23  
24  
25  
26  
27  
28  
29  
30  
31  
32  
33  
34  
35  
36  
37  
38  
39  
40  
41  
42  
43  
44  
45  
46  
47  
48  
49  
50  
51  
52  
53  
54  
55  
56  
57  
58  
59  
60

For peer review only

# BMJ Open

## Social and territorial inequalities in breast and cervical cancers screening uptake: a cross-sectional study in France

|                                 |                                                                                                                                                                                                                                                                                                                                                                                                                                                                                                                                                                                                                                                                                                                   |
|---------------------------------|-------------------------------------------------------------------------------------------------------------------------------------------------------------------------------------------------------------------------------------------------------------------------------------------------------------------------------------------------------------------------------------------------------------------------------------------------------------------------------------------------------------------------------------------------------------------------------------------------------------------------------------------------------------------------------------------------------------------|
| Journal:                        | <i>BMJ Open</i>                                                                                                                                                                                                                                                                                                                                                                                                                                                                                                                                                                                                                                                                                                   |
| Manuscript ID                   | bmjopen-2021-055363.R2                                                                                                                                                                                                                                                                                                                                                                                                                                                                                                                                                                                                                                                                                            |
| Article Type:                   | Original research                                                                                                                                                                                                                                                                                                                                                                                                                                                                                                                                                                                                                                                                                                 |
| Date Submitted by the Author:   | 24-Dec-2021                                                                                                                                                                                                                                                                                                                                                                                                                                                                                                                                                                                                                                                                                                       |
| Complete List of Authors:       | <p>Ouanhnon, Lisa; Université Toulouse III Paul Sabatier, DUMG (Département Universitaire de Médecine Générale); INSERM UMR_S 1027, CERPOP</p> <p>Rougé Bugat, Marie-Eve ; Université Toulouse III Paul Sabatier, DUMG (Département Universitaire de Médecine Générale); INSERM UMR_S 1027, CERPOP</p> <p>LAMY, Sebastien; Institute Claudius Regaud; INSERM UMR_S 1027, CERPOP</p> <p>Druel, Vladimir; Université Toulouse III Paul Sabatier, DUMG (Département Universitaire de Médecine Générale); INSERM UMR_S 1027, CERPOP</p> <p>Delpierre, Cyrille; INSERM UMR_S 1027, CERPOP; Université Toulouse III Paul Sabatier,</p> <p>Grosclaude, Pascale; INSERM UMR_S 1027, CERPOP; Institute Claudius Regaud</p> |
| <b>Primary Subject Heading</b>: | Public health                                                                                                                                                                                                                                                                                                                                                                                                                                                                                                                                                                                                                                                                                                     |
| Secondary Subject Heading:      | Obstetrics and gynaecology, Sociology, Health policy, Epidemiology                                                                                                                                                                                                                                                                                                                                                                                                                                                                                                                                                                                                                                                |
| Keywords:                       | Gynaecological oncology < GYNAECOLOGY, GENERAL MEDICINE (see Internal Medicine), Health policy < HEALTH SERVICES ADMINISTRATION & MANAGEMENT, Organisation of health services < HEALTH SERVICES ADMINISTRATION & MANAGEMENT, SOCIAL MEDICINE, PREVENTIVE MEDICINE                                                                                                                                                                                                                                                                                                                                                                                                                                                 |
|                                 |                                                                                                                                                                                                                                                                                                                                                                                                                                                                                                                                                                                                                                                                                                                   |

SCHOLARONE™  
Manuscripts



I, the Submitting Author has the right to grant and does grant on behalf of all authors of the Work (as defined in the below author licence), an exclusive licence and/or a non-exclusive licence for contributions from authors who are: i) UK Crown employees; ii) where BMJ has agreed a CC-BY licence shall apply, and/or iii) in accordance with the terms applicable for US Federal Government officers or employees acting as part of their official duties; on a worldwide, perpetual, irrevocable, royalty-free basis to BMJ Publishing Group Ltd ("BMJ") its licensees and where the relevant Journal is co-owned by BMJ to the co-owners of the Journal, to publish the Work in this journal and any other BMJ products and to exploit all rights, as set out in our [licence](#).

The Submitting Author accepts and understands that any supply made under these terms is made by BMJ to the Submitting Author unless you are acting as an employee on behalf of your employer or a postgraduate student of an affiliated institution which is paying any applicable article publishing charge ("APC") for Open Access articles. Where the Submitting Author wishes to make the Work available on an Open Access basis (and intends to pay the relevant APC), the terms of reuse of such Open Access shall be governed by a Creative Commons licence – details of these licences and which [Creative Commons](#) licence will apply to this Work are set out in our licence referred to above.

Other than as permitted in any relevant BMJ Author's Self Archiving Policies, I confirm this Work has not been accepted for publication elsewhere, is not being considered for publication elsewhere and does not duplicate material already published. I confirm all authors consent to publication of this Work and authorise the granting of this licence.

1  
2  
3 Title: Social and territorial inequalities in breast and cervical cancers screening uptake: a cross-  
4 sectional study in France  
5  
6  
7

8 Authors: Lisa Ouahnnon<sup>1,2</sup>, Marie-Eve Rouge Bugat<sup>1,2</sup>, Sébastien Lamy<sup>2,4</sup> Vladimir Druel<sup>1,2</sup>,  
9 Cyrille Delpierre<sup>2,3,\*</sup>, Pascale Grosclaude<sup>2,3,4,\*</sup>  
10  
11  
12  
13  
14

15 Authors affiliations:

16  
17 <sup>1</sup> DUMG (Département Universitaire de Médecine Générale), Université Toulouse 3 Paul  
18 Sabatier, Toulouse, France  
19

20  
21 <sup>2</sup> CERPOP, UMR1295, Inserm, Université Toulouse 3 Paul Sabatier, Toulouse, France  
22

23  
24 <sup>3</sup> Equipe Labellisée Ligue Contre le Cancer  
25

26  
27 <sup>4</sup> Institut Claudius Regaud, IUCT-O, Registre des cancers du Tarn, Toulouse, France  
28

29 \* these two authors have equally supervised the work  
30

31 The research team is supported by the French association “La Ligue contre le cancer”.  
32  
33  
34  
35

36 Corresponding author: Lisa Ouahnnon, 87 rue du Faubourg Bonnefoy 31500 Toulouse,  
37 France, lisa.ouahnnon@gmail.com, +33661594978  
38  
39  
40  
41  
42

43 Word counts of the main text: 3177 and abstract: 287 words  
44

45 Number of tables, figures and appendixes: 3 tables, 2 figures and 6 appendixes (2 tables A, 4  
46 tables B)  
47  
48  
49  
50  
51  
52  
53  
54  
55  
56  
57  
58  
59  
60

## Abstract

**Objective** The objective of this cross-sectional study was to investigate the impact of socio-territorial characteristics on mammography and pap smear uptake according to the place of residence in the recommended age groups, and secondly outside the recommended age groups.

**Setting and participants** We used an existing dataset of 1,027,039 women which combines data from the Health Insurance information systems, with census data from Midi-Pyrénées, France.

**Primary and secondary outcome measures** Our outcome was, for each woman, the uptake of the pap smear and the uptake of the mammography during the year.

**Results** A social gradient of screening uptake was found in the recommended age groups. This gradient was stronger in large urban areas:

- For mammography: decile 10 [the most deprived] vs 1 [the least deprived], adjusted OR= 0.777, 95%CI [0.748,0.808] in large urban area; adjusted OR= 0.808 for decile 1 to 0.726 for decile 10 in other areas vs decile 1 in urban areas;
- For pap smear: decile 10 vs 1 adjusted OR= 0.66, 95%CI [0.642,0.679] in large urban areas; adjusted OR= 0.747 for decile 1 to 0.562 for decile 10 in other areas vs decile 1 in urban areas).

Screening rates were globally higher in large urban areas.

For mammography, the social and territorial disparities were higher outside the recommended age group.

**Conclusions** Offering a universal approach to every woman, as it is often the case in nationally organised screening programmes, is likely to be insufficient to ensure real equity in access. Developing global dataset combining health data and diverse socioeconomic data, at

1  
2  
3 individual and contextual levels, could enable a better understanding of the mechanisms  
4 involved in this social gradient, and therefore the development of targeted territorial actions to  
5 improve equity of access to healthcare.  
6  
7  
8  
9  
10  
11  
12  
13  
14  
15

### 16 Keywords

17  
18  
19 Breast cancer screening; Cervical cancer screening; Screening programme participation;  
20  
21 Women health; Socioeconomic inequalities; Geographic inequalities; Deprivation index.  
22  
23  
24

### 25 Strengths and limitations of this study

- 26  
27
- 28 • The use of health insurance data, merged with socio-territorial information, allowed  
29 for a very powerful and comprehensive study on social inequalities in health (database  
30 of 2.5 million of individuals or 88% of the region's total population).  
31  
32
  - 33 • We used both individual and contextual variables to investigate the link between an  
34 ecological deprivation index and breast and cervical cancers screening.  
35  
36
  - 37 • We performed a sequential regression (variables were successively added in the  
38 multivariable model) to investigate the role of each variable in the link between the  
39 ecological deprivation index and screening and studied the interaction between EDI  
40 and the type of place of residence  
41  
42
  - 43 • Our data covered only 1 year and we had a limited number of individual and  
44 contextual variables in our dataset.  
45  
46  
47  
48  
49  
50  
51  
52  
53  
54  
55  
56  
57  
58  
59  
60



1  
2  
3 Abbreviations:  
4

5  
6 CMU-C: Couverture Médicale Universelle-Complémentaire (Supplementary Universal  
7  
8 Healthcare Coverage)  
9

10  
11 EDI: European deprivation Index  
12

13  
14 GP: General Practitioner  
15

16  
17 INSEE: Institut National de la Statistique et des Etudes Economiques (French National  
18  
19 Institute of Statistics and Economic Studies)  
20

21  
22 IRIS: Ilots Regroupés pour l'Information statistique (aggregated units for statistical  
23  
24 information)  
25

26  
27 OR: Odds-Ratio  
28

29  
30 PLA: Potential Localised Accessibility  
31

32  
33 SEP: Socioeconomic Position  
34  
35  
36  
37  
38  
39  
40  
41  
42  
43  
44  
45  
46  
47  
48  
49  
50  
51  
52  
53  
54  
55  
56  
57  
58  
59  
60

## 1. Introduction

Breast and cervical cancers are among the most frequent cancers in women worldwide. They kill more than 600,000 and 300,000 women, respectively, every year (1).

For breast cancer in France, through the nationally organised screening programme, all women between 50 and 74 years old are offered a mammography every 2 years (2). For cervical cancer, a national screening programme is progressively being implemented (3). Before 2018, guidelines recommended a pap smear every 3 years between 25 and 65 years old.

In France, the participation rate is around 50% for breast cancer screening and 60% for cervical cancer (4). Despite an universal health coverage policy, mammography and pap smear uptake, and therefore breast and cervical cancer survival, vary considerably with factors like socioeconomic position (SEP) and place of residence (5–8). This raises the question of the determinants of universal access, in particular physical accessibility (availability, reasonable reach), financial affordability (healthcare cost, transportation, time away from work) and sociocultural accessibility (perceived effectiveness, social and cultural factors) (9,10). All these dimensions may be socially distributed and partly explain the inequalities of screening uptake.

Disentangling underlying mechanisms leading to these inequalities is a first step to address them. However, further studies on this topic have been made difficult by the lack of large and representative dataset combining socioeconomic, territorial, and healthcare data (11).

We used French healthcare insurance reimbursement data, merged with socio-territorial information, to assess and investigate the influence of deprivation on mammography and pap smear uptake, according to the place of residence, in the recommended age groups, and

1  
2  
3 secondly outside the recommended age groups. To this end, we investigated the role of  
4 variables indicating financial precarity, healthcare accessibility, and adherence to the  
5 healthcare system.  
6  
7  
8  
9

## 10 11 12 13 2. Methods

### 14 15 16 *Study design*

17  
18 We used a dataset combining data from health insurance information systems with census  
19 data, based on the address of residence. This dataset has been described in detail elsewhere  
20 (12).  
21  
22  
23  
24  
25

26 The health data was prospectively collected by the three main health insurance providers for  
27 2012.  
28  
29  
30

### 31 32 *Population*

33  
34 This dataset included individuals who were beneficiaries of any of the three health insurance  
35 providers on the 31<sup>st</sup> of December 2012 in Midi-Pyrénées. The individuals with an incomplete  
36 address or with differences in the management of their data were excluded. We obtained a  
37 base of 2,574,310 subjects (88% of the region's total population).  
38  
39  
40  
41  
42  
43

44 For this study, we focused on women over 20 years old (1,027,039 women), as cancers  
45 screening is rarely offered to women below that age.  
46  
47  
48

### 49 50 *Patient and public involvement*

51  
52 Patients or the public were not involved in the design of our study.  
53  
54

### 55 56 *Collected variables*

- 57  
58 - Main outcomes
- 59  
60

1  
2  
3 Our outcome was, for each woman, the uptake of the pap smear and the uptake of the  
4 mammography. It was categorised as a binary variable for each screening test to discriminate  
5 the women who had at least one mammography/pap smear during the year, and the other  
6 ones. Regarding mammography, we only included screening exams, but we could not  
7 differentiate between opportunistic and organised screening.  
8  
9  
10  
11  
12  
13  
14  
15  
16

17 - Main explanatory variables

18  
19 In the absence of individual social data, social condition of the participants was approached  
20 by an ecological deprivation index, the European Deprivation Index (13). The EDI  
21 approaches SEP by measuring social deprivation as defined by Townsend as “a state of  
22 observable and demonstrable disadvantage relative to the local community or the wider  
23 society to which an individual, family or group belongs”. To calculate the EDI, we used the  
24 aggregated unit for statistical information (‘IRIS’) corresponding to the person’s address.  
25 IRIS is the smallest geographical unit for which statistics are available in France, which  
26 represents about 2,000 inhabitants. Each IRIS was assigned an EDI value, calculated with  
27 census data. We used an EDI presentation in deciles, calculated from all the IRISs of the  
28 region: decile 1 corresponds to the least deprived zones, decile 10 to the most deprived zones.  
29  
30  
31  
32  
33  
34  
35  
36  
37  
38  
39  
40  
41  
42  
43  
44

45 - Covariates

46 We considered age as a potential confounder. As the association between this variable and the  
47 outcomes clearly appeared non-linear, we categorised it (into 5-year groups).  
48  
49  
50

51  
52 As an ecological index of deprivation, EDI is assumed to be capturing both intrinsic  
53 properties of the individuals in the area and contextual properties of the area (14). To explore  
54 the mechanisms involved in the link between EDI and screening uptake, we chose to study  
55 various factors, including one individual and one contextual:  
56  
57  
58  
59  
60

- 1  
2  
3 - The Supplementary Universal Healthcare Coverage (CMU-C), is offered to  
4 individuals who earn less than a defined income threshold, to pay for their healthcare  
5 expenses. This characteristic was used as a proxy for individual financial precarity.  
6  
7 Our hypothesis was that financial precarity, by limiting financial accessibility, was key  
8 in the link between deprivation and screening participation.  
9  
10  
11  
12  
13  
14 - Healthcare supply is a contextual property influencing deprivation. We assumed that  
15 this factor could partly explain the link between EDI and screening uptake by  
16 measuring physical accessibility. Healthcare supply at IRIS level was approached by  
17 the Potential Localised Accessibility (PLA) to the GP. The PLA calculates the  
18 distance-weighted supply and the local demand, measured by the age-differentiated  
19 rate of access. It is interpreted as a medical density (number of full-time equivalents  
20 for 100 000 inhabitants) (15).  
21  
22  
23  
24  
25  
26  
27  
28  
29  
30

31 We assumed that the overall healthcare system adherence could also explain part of the  
32 association between deprivation and screening uptake. Therefore, we used a binary variable  
33 that discriminates between the patients who had no designated referring physician (in most  
34 cases a General Practitioner (GP)) and the ones who had one. This health-seeking behaviour is  
35 a property of individuals but is likely to be influenced by both individual and contextual  
36 factors (16).  
37  
38  
39  
40  
41  
42  
43  
44  
45

46 Healthcare supply and transport facilities are very different in rural and urban areas (17–19).  
47 We assumed that the level of urbanisation of the place of residence could modify the social  
48 gradient of screening uptake. Based on the French National Institute of Statistics and  
49 Economic Studies (INSEE)'s 2010 zoning in urban areas, we built a variable to distinguish  
50 the large urban centres (more than 10 000 jobs) and their suburbs (urban units in which at  
51 least 40% of the active residents work in the urban centre or in the towns attracted by it) (20),  
52 from the rest of the region. In the descriptive analysis, we differentiated among large urban  
53  
54  
55  
56  
57  
58  
59  
60

1  
2  
3 areas between Toulouse metropolis, the regional capital which covers almost a quarter of the  
4  
5 region's population, and the other areas.  
6  
7

8 Our conceptual model showing how these variables interact is presented in Figure 1.  
9  
10

### 11 12 13 14 *Statistical analysis*

15  
16 To describe the sample, we performed univariate analyses: we tested the association between  
17  
18 the main explanatory variable and the outcomes, between each covariate and the outcomes,  
19  
20 and between each covariate and the EDI.  
21  
22

23 We used a multivariable logistic regression model to analyse the association between EDI and  
24  
25 the mammography and pap smear uptake, adjusted for all the previously identified  
26  
27 confounders and intermediate variables. We performed a sequential regression. The variables  
28  
29 were successively added to the model following a pre-defined order: the main explanatory  
30  
31 variable alone first, then the confounder, and lastly the intermediate variables (at an individual  
32  
33 then at a contextual level).  
34  
35

36 We studied the interaction between EDI and the type of place of residence (large urban/other  
37  
38 areas) in the model through a new variable: a 20-modal indicator with ten modalities  
39  
40 (corresponding to the EDI deciles) per type of geographical area.  
41  
42

43 We undertook some age groups analyses to study women outside the recommended age  
44  
45 groups (younger and older). For younger women, we focused on women aged 20 to 25 for pap  
46  
47 smear and 40 to 50 for mammography. Our hypothesis was that social and territorial  
48  
49 inequalities were higher for women outside the recommended age groups.  
50  
51

52 Since we used data that are systematically recorded by health insurance providers, we  
53  
54 expected very little missing data. This was therefore negligible in light of the global sample  
55  
56 size (around 0.01%): a complete case analysis could be used.  
57  
58

59 Statistical analyses were performed with R software (R x64 3.0.2) (21).  
60

### 3. Results

Selected population in the recommended age groups for mammography (50-74 years old) and pap smear (25-65 years old), were composed of 365 947 and 711 803 women respectively (Table 1). Among these women, 31% had had at least one mammography during the year, and 29% at least one pap smear. Almost two thirds of the population lived in large urban areas. A major part of the most disadvantaged women lived in the Toulouse metropolis (Supplementary material Appendix 1, Tables A). Around 8% of the 25-65 women and less than 4% of the 50-74 had the CMU-C. 92% of the 25-65 women and 95% of the 50-74 had a designated referring physician.

The more deprived the area of residence, the lower the breast and cervical cancers screening uptakes ( $p$ -value  $< 0.001$ ) (Table 1). Regarding age, the mammography rate seemed rather constant throughout the recommended ages. Pap smear uptake decreased a lot after 55 years old (from 31% to 23% between the 45-50 and the 55-60-year-old groups). Women with CMU-C had a lower screening uptake rate. We noticed a slight territorial gradient: the higher the GP density, the higher the mammography and pap smear uptake, except for the last two deciles. The women living in large urban areas had a higher screening rate than the ones living in the rest of the region. Women who had a designated referring physician had a higher screening rate (32% vs 5% for mammography, 31% vs 8% for pap smear,  $p$ -value  $< 0.001$ ).

Adding the interaction term between EDI and the type of place of residence (large urban/other areas) improved our models (better likelihood,  $p$ -value= 0.0048 for mammography uptake and 0.0040 for pap smear uptake). Tables 2 and 3 present the logistic regression of mammography and pap smear uptake in the recommended age groups: first the odds-ratios associated with

1  
2  
3 the variable combining EDI and the type of place of residence (large urban/other areas), then  
4  
5 the result of the sequential adjustments, and lastly the final multivariable regression model.

6  
7 For mammography (Table 2), an effect of EDI on mammography uptake was observed,  
8  
9 through a social gradient: the screening uptake regularly decreased with increasing  
10  
11 deprivation. This social gradient was mostly observed in large urban areas (decile 10 vs 1  
12  
13 adjusted OR= 0.777, 95%CI [0.748,0.808]). The social gradient was less strong in the other  
14  
15 areas, where mammography rate was globally lower than in urban areas. Influence of  
16  
17 financial precarity was corroborated by CMU-C impact on screening uptake (adjusted OR=  
18  
19 0.644, 95%CI [0.618; 0.671]). The territorial gradient based on GP accessibility was  
20  
21 confirmed. Adding this variable decreased only slightly the difference between large urban  
22  
23 and other areas. The link between mammography and having a designated referring physician  
24  
25 was confirmed as well (adjusted OR = 8.45, 95%CI [7.946; 8.996]). Age had a very limited  
26  
27 effect on mammography uptake. Sequential inclusion of all these variables in the model  
28  
29 modified only slightly the link between EDI and screening uptake.  
30  
31  
32  
33  
34  
35  
36

37 For pap smear (Table 3), a strong social gradient was observed. This gradient was slightly  
38  
39 stronger in large urban areas (decile 10 vs 1 adjusted OR= 0.66, 95%CI [0.642,0.679]) than in  
40  
41 the rest of the region (adjusted OR= 0.747 for decile 1 to 0.562 for decile 10 in other areas vs  
42  
43 decile 1 in urban areas). Influence of financial precarity was corroborated by CMU-C impact  
44  
45 on screening uptake (adjusted OR= 0.669). The territorial gradient (based on GP accessibility)  
46  
47 was confirmed but, as for mammography, adding this variable decreased only slightly the  
48  
49 difference between large urban and other areas. The multivariable analysis confirmed the  
50  
51 association between having a designated referring physician and pap smear uptake (adjusted  
52  
53 OR = 5.39 95%CI [5.227; 5.557]). An effect of age on pap smear uptake was also found  
54  
55 (adjusted OR= 0.59, 95% CI [0.574; 0.601] for 55-60-year-old women vs 25-30 women).  
56  
57  
58  
59  
60



1  
2  
3 Sequential inclusion of all these variables in the model modified only slightly the link  
4  
5 between EDI and screening uptake.  
6  
7

8  
9 We used the same approach for women outside the recommended age groups (Figure 2 &  
10  
11 supplementary material Appendix 2, Tables B). Among younger women (40-50 years old for  
12  
13 mammography and 20-25 for pap smear), both mammography and pap smear uptakes in the  
14  
15 year were around 21%. Among women older than the recommended age, participation rates  
16  
17 were around 6% for both breast and cervical cancers. Figure 2 shows that the social gradient  
18  
19 in mammography uptake was substantially stronger in women between the ages of 40 and 50,  
20  
21 and more so in large urban areas. For pap smear uptake, social gradient seemed less strong in  
22  
23 younger women. Regarding GP accessibility, we observed a stronger territorial gradient for  
24  
25 older women, for both screening uptakes.  
26  
27  
28  
29  
30  
31  
32  
33  
34  
35  
36  
37  
38  
39  
40  
41  
42  
43  
44  
45  
46  
47  
48  
49  
50  
51  
52  
53  
54  
55  
56  
57  
58  
59  
60

|                       | <b>Total<br/>50-74 y.o<br/>N=365 947<br/>N (%)</b> | <b>No<br/>mammography<br/>n (%)<br/>n= 253 354<br/>(69.23)</b> | <b>≥ 1 mammography<br/>n (%)<br/>n= 112 593<br/>(30.77)</b> | <b>Total<br/>25-65 y.o<br/>N=711 803<br/>N (%)</b> | <b>No pap smear<br/>n (%)<br/>n= 506 731<br/>(71.19)</b> | <b>≥ 1 pap smear<br/>n (%)<br/>n= 205 072<br/>(28.81)</b> |
|-----------------------|----------------------------------------------------|----------------------------------------------------------------|-------------------------------------------------------------|----------------------------------------------------|----------------------------------------------------------|-----------------------------------------------------------|
| <b>EDI</b>            |                                                    |                                                                |                                                             |                                                    |                                                          |                                                           |
| 1 (best)              | 31201 (8.53)                                       | 20675 (66.26)                                                  | 10526 (33.74)                                               | 62238 (8.74)                                       | 40787 (65.53)                                            | 21451 (34.47)                                             |
| 2                     | 34826 (9.52)                                       | 23263 (66.8)                                                   | 11563 (33.2)                                                | 70952 (9.97)                                       | 47640 (67.14)                                            | 23312 (32.86)                                             |
| 3                     | 30111 (8.23)                                       | 20414 (67.8)                                                   | 9697 (32.2)                                                 | 60763 (8.54)                                       | 41703 (68.63)                                            | 19060 (31.37)                                             |
| 4                     | 31564 (8.63)                                       | 21596 (68.42)                                                  | 9968 (31.58)                                                | 60572 (8.51)                                       | 42269 (69.78)                                            | 18303 (30.22)                                             |
| 5                     | 32733 (8.94)                                       | 22750 (69.5)                                                   | 9983 (30.5)                                                 | 65031 (9.14)                                       | 46072 (70.85)                                            | 18959 (29.15)                                             |
| 6                     | 39518 (10.8)                                       | 27130 (68.65)                                                  | 12388 (31.35)                                               | 73464 (10.32)                                      | 53153 (72.35)                                            | 20311 (27.65)                                             |
| 7                     | 38825 (10.61)                                      | 27107 (69.82)                                                  | 11718 (30.18)                                               | 72276 (10.15)                                      | 52119 (72.11)                                            | 20157 (27.89)                                             |
| 8                     | 37868 (10.35)                                      | 26309 (69.48)                                                  | 11559 (30.52)                                               | 70412 (9.89)                                       | 51084 (72.55)                                            | 19328 (27.45)                                             |
| 9                     | 42390 (11.58)                                      | 29998 (70.77)                                                  | 12392 (29.23)                                               | 82232 (11.55)                                      | 60646 (73.75)                                            | 21586 (26.25)                                             |
| 10 (worst)            | 46911 (12.82)                                      | 34112 (72.72)                                                  | 12799 (27.28)                                               | 93863 (13.19)                                      | 71258 (75.92)                                            | 22605 (24.08)                                             |
| <b>Age (/5years)</b>  |                                                    |                                                                |                                                             |                                                    |                                                          |                                                           |
| 25-30 y.o.            | -                                                  | -                                                              | -                                                           | 82413 (11.58)                                      | 56617 (68.7)                                             | 25796 (31.3)                                              |
| 30-35 y.o.            | -                                                  | -                                                              | -                                                           | 88249 (12.4)                                       | 58932 (66.78)                                            | 29317 (33.22)                                             |
| 35-40 y.o.            | -                                                  | -                                                              | -                                                           | 85200 (11.97)                                      | 57150 (67.08)                                            | 28050 (32.92)                                             |
| 40-45 y.o.            | -                                                  | -                                                              | -                                                           | 92964 (13.06)                                      | 63042 (67.81)                                            | 29922 (32.19)                                             |
| 45-50 y.o.            | -                                                  | -                                                              | -                                                           | 94291 (13.25)                                      | 64872 (68.8)                                             | 29419 (31.2)                                              |
| 50-55 y.o.            | 88241 (24.11)                                      | 61449 (69.64)                                                  | 26792 (30.36)                                               | 88241 (12.4)                                       | 64145 (72.69)                                            | 24096 (27.31)                                             |
| 55-60 y.o.            | 83126 (22.72)                                      | 57836 (69.58)                                                  | 25290 (30.42)                                               | 83126 (11.68)                                      | 64120 (77.14)                                            | 19006 (22.86)                                             |
| 60-65 y.o.            | 81209 (22.19)                                      | 55168 (67.93)                                                  | 26041 (32.07)                                               | 81209 (11.41)                                      | 64544 (79.48)                                            | 16665 (20.52)                                             |
| 65-70 y.o.            | 64794 (17.71)                                      | 44289 (68.35)                                                  | 20505 (31.65)                                               | 16110 (2.26) <sup>1</sup>                          | 13309 (82.61)                                            | 2801 (17.39)                                              |
| 70-75 y.o.            | 48577 (13.27)                                      | 34612 (71.25)                                                  | 13965 (28.75)                                               | -                                                  | -                                                        | -                                                         |
| <b>CMU-C</b>          |                                                    |                                                                |                                                             |                                                    |                                                          |                                                           |
| No CMU-C              | 351872 (96.15)                                     | 242406 (68.89)                                                 | 109466 (31.11)                                              | 655969 (92.16)                                     | 463517 (70.66)                                           | 192452 (29.34)                                            |
| CMU-C                 | 14075 (3.85)                                       | 10948 (77.78)                                                  | 3127 (22.22)                                                | 55834 (7.84)                                       | 43214 (77.4)                                             | 12620 (22.6)                                              |
| <b>GP PLA</b>         |                                                    |                                                                |                                                             |                                                    |                                                          |                                                           |
| 1 (worst)             | 11427 (3.12)                                       | 8212 (71.86)                                                   | 3215 (28.14)                                                | 18607 (2.61)                                       | 13784 (74.08)                                            | 4823 (25.92)                                              |
| 2                     | 13767 (3.76)                                       | 9738 (70.73)                                                   | 4029 (29.27)                                                | 24385 (3.43)                                       | 17816 (73.06)                                            | 6569 (26.94)                                              |
| 3                     | 14455 (3.95)                                       | 10195 (70.53)                                                  | 4260 (29.47)                                                | 26121 (3.67)                                       | 18888 (72.31)                                            | 7233 (27.69)                                              |
| 4                     | 20582 (5.62)                                       | 14258 (69.27)                                                  | 6324 (30.73)                                                | 37307 (5.24)                                       | 26610 (71.33)                                            | 10697 (28.67)                                             |
| 5                     | 26405 (7.22)                                       | 18029 (68.28)                                                  | 8376 (31.72)                                                | 49815 (7)                                          | 35139 (70.54)                                            | 14676 (29.46)                                             |
| 6                     | 32262 (8.82)                                       | 21930 (67.97)                                                  | 10332 (32.03)                                               | 63615 (8.94)                                       | 44311 (69.65)                                            | 19304 (30.35)                                             |
| 7                     | 50863 (13.9)                                       | 34371 (67.58)                                                  | 16492 (32.42)                                               | 98949 (13.9)                                       | 68782 (69.51)                                            | 30167 (30.49)                                             |
| 8                     | 62331 (17.03)                                      | 42592 (68.33)                                                  | 19739 (31.67)                                               | 123460 (17.34)                                     | 86465 (70.03)                                            | 36995 (29.97)                                             |
| 9                     | 64131 (17.52)                                      | 44615 (69.57)                                                  | 19516 (30.43)                                               | 127253 (17.88)                                     | 90793 (71.35)                                            | 36460 (28.65)                                             |
| 10 (best)             | 69724 (19.05)                                      | 49414 (70.87)                                                  | 20310 (29.13)                                               | 142291 (19.99)                                     | 104143 (73.19)                                           | 38148 (26.81)                                             |
| <b>Urbanisation</b>   |                                                    |                                                                |                                                             |                                                    |                                                          |                                                           |
| Toulouse              | 72919 (19.93)                                      | 49978 (68.54)                                                  | 22941 (31.46)                                               | 180030 (25.59)                                     | 123038 (68.34)                                           | 56992 (31.66)                                             |
| Large urban areas     | 150755 (41.2)                                      | 102663 (68.1)                                                  | 48092 (31.9)                                                | 302563 (42.51)                                     | 211072 (69.76)                                           | 91491 (30.24)                                             |
| Other areas           | 142273 (38.88)                                     | 100713 (70.79)                                                 | 41560 (29.21)                                               | 229210 (32.2)                                      | 172621 (75.31)                                           | 56589 (24.69)                                             |
| <b>RP<sup>2</sup></b> |                                                    |                                                                |                                                             |                                                    |                                                          |                                                           |
| No                    | 20032 (5.47)                                       | 18963 (94.66)                                                  | 1069 (5.34)                                                 | 57596 (8.09)                                       | 52948 (91.93)                                            | 4648 (8.07)                                               |
| Yes                   | 345915 (94.53)                                     | 234391 (67.76)                                                 | 111524 (32.24)                                              | 654207 (91.91)                                     | 453783 (69.36)                                           | 200424 (30.64)                                            |

**Table1: Socio-demographic characteristics of women**

<sup>1</sup> Only 65 y.o. women

<sup>2</sup> RP : Designated referring physician

\*: p-value <0.001

**Table 2: Mammography uptake in recommended age group: multivariable logistic regression models (mammography uptake = 30.77%)**

|                                                 |                    | N           | Model 1             | LogLik  | Model 2              | LogLik  | Model 3              | LogLik  | Model 4              | LogLik  | Model 5              | LogLik  |
|-------------------------------------------------|--------------------|-------------|---------------------|---------|----------------------|---------|----------------------|---------|----------------------|---------|----------------------|---------|
|                                                 |                    | Tot= 365947 | OR (95%CI)          | -225465 | OR (95%CI)           | -225373 | OR (95%CI)           | -225160 | OR (95%CI)           | -225115 | OR (95%CI)           | -220891 |
| <b>Combined EDI and large urban/other areas</b> | 1 <sup>3</sup>     | 2 719       | 1                   |         | 1                    |         | 1                    |         | 1                    |         | 1                    |         |
|                                                 | 2                  | 5 896       | 0.981 (0.948,1.016) |         | 0.982 (0.948,1.016)  |         | 0.983 (0.95,1.018)   |         | 0.983 (0.949,1.018)  |         | 0.976 (0.942,1.011)  |         |
|                                                 | 3                  | 10 112      | 0.967 (0.931,1.005) |         | 0.968 (0.932,1.006)  |         | 0.971 (0.934,1.009)  |         | 0.968 (0.932,1.007)  |         | 0.962 (0.925,1)      |         |
|                                                 | 4                  | 13 232      | 0.933 (0.897,0.97)  |         | 0.934 (0.898,0.971)  |         | 0.939 (0.902,0.976)  |         | 0.934 (0.897,0.971)  |         | 0.927 (0.891,0.965)  |         |
|                                                 | 5                  | 12 730      | 0.889 (0.856,0.924) |         | 0.89 (0.857,0.925)   |         | 0.897 (0.863,0.933)  |         | 0.9 (0.865,0.936)    |         | 0.897 (0.862,0.933)  |         |
|                                                 | 6                  | 19 906      | 0.928 (0.893,0.965) |         | 0.929 (0.894,0.966)  |         | 0.936 (0.901,0.973)  |         | 0.932 (0.896,0.969)  |         | 0.927 (0.891,0.964)  |         |
|                                                 | 7                  | 20 092      | 0.849 (0.816,0.883) |         | 0.85 (0.817,0.884)   |         | 0.858 (0.825,0.892)  |         | 0.861 (0.826,0.896)  |         | 0.864 (0.83,0.9)     |         |
|                                                 | 8                  | 20 741      | 0.872 (0.837,0.908) |         | 0.873 (0.838,0.909)  |         | 0.885 (0.85,0.922)   |         | 0.893 (0.857,0.931)  |         | 0.895 (0.858,0.933)  |         |
|                                                 | 9                  | 20 679      | 0.838 (0.807,0.871) |         | 0.84 (0.809,0.872)   |         | 0.855 (0.823,0.888)  |         | 0.86 (0.827,0.895)   |         | 0.867 (0.833,0.903)  |         |
|                                                 | 10                 | 16 166      | 0.733 (0.708,0.759) |         | 0.734 (0.709,0.76)   |         | 0.763 (0.737,0.79)   |         | 0.771 (0.742,0.801)  |         | 0.777 (0.748,0.808)  |         |
| EDI (deciles) in large urban areas              | 1                  | 28 482      | 0.782 (0.718,0.853) |         | 0.783 (0.718,0.854)  |         | 0.784 (0.719,0.855)  |         | 0.811 (0.743,0.884)  |         | 0.808 (0.74,0.882)   |         |
|                                                 | 2                  | 28 930      | 0.841 (0.791,0.893) |         | 0.842 (0.792,0.894)  |         | 0.845 (0.795,0.897)  |         | 0.861 (0.81,0.915)   |         | 0.855 (0.804,0.91)   |         |
|                                                 | 3                  | 19 999      | 0.814 (0.775,0.855) |         | 0.814 (0.775,0.855)  |         | 0.817 (0.778,0.858)  |         | 0.838 (0.798,0.881)  |         | 0.834 (0.793,0.877)  |         |
|                                                 | 4                  | 18 332      | 0.829 (0.793,0.866) |         | 0.829 (0.793,0.867)  |         | 0.833 (0.797,0.871)  |         | 0.845 (0.808,0.883)  |         | 0.84 (0.803,0.879)   |         |
|                                                 | 5                  | 20 003      | 0.777 (0.742,0.813) |         | 0.777 (0.742,0.813)  |         | 0.78 (0.746,0.817)   |         | 0.797 (0.761,0.835)  |         | 0.794 (0.758,0.832)  |         |
|                                                 | 6                  | 19 612      | 0.831 (0.799,0.864) |         | 0.832 (0.801,0.866)  |         | 0.838 (0.805,0.871)  |         | 0.847 (0.815,0.881)  |         | 0.846 (0.813,0.881)  |         |
|                                                 | 7                  | 18 733      | 0.816 (0.785,0.848) |         | 0.817 (0.786,0.85)   |         | 0.824 (0.792,0.857)  |         | 0.834 (0.801,0.867)  |         | 0.829 (0.797,0.863)  |         |
|                                                 | 8                  | 17 127      | 0.824 (0.793,0.857) |         | 0.825 (0.794,0.858)  |         | 0.833 (0.802,0.866)  |         | 0.846 (0.813,0.88)   |         | 0.842 (0.809,0.876)  |         |
|                                                 | 9                  | 21 711      | 0.751 (0.722,0.78)  |         | 0.751 (0.722,0.781)  |         | 0.762 (0.733,0.792)  |         | 0.767 (0.737,0.798)  |         | 0.767 (0.737,0.799)  |         |
|                                                 | 10                 | 30 745      | 0.702 (0.672,0.732) |         | 0.703 (0.674,0.734)  |         | 0.718 (0.688,0.75)   |         | 0.729 (0.698,0.762)  |         | 0.726 (0.694,0.759)  |         |
| <b>Age (y.o)</b>                                | 50-55 <sup>3</sup> | 88 241      |                     |         | 1                    |         | 1                    |         | 1                    |         | 1                    |         |
|                                                 | 55-60              | 83 126      |                     |         | 1.006 (0.985; 1.027) |         | 1.002 (0.982; 1.023) |         | 1.002 (0.982; 1.023) |         | 0.997 (0.977; 1.018) |         |
|                                                 | 60-65              | 81 209      |                     |         | 1.088 (1.066; 1.111) |         | 1.077 (1.055; 1.099) |         | 1.077 (1.055; 1.1)   |         | 1.066 (1.044; 1.088) |         |
|                                                 | 65-70              | 64 794      |                     |         | 1.07 (1.047; 1.094)  |         | 1.052 (1.029; 1.076) |         | 1.052 (1.029; 1.076) |         | 1.035 (1.012; 1.058) |         |
|                                                 | 70-75              | 48 577      |                     |         | 0.938 (0.916; 0.961) |         | 0.919 (0.897; 0.942) |         | 0.919 (0.897; 0.942) |         | 0.897 (0.875; 0.919) |         |
| <b>CMU-C</b>                                    | No <sup>3</sup>    | 351 872     |                     |         |                      |         | 1                    |         | 1                    |         | 1                    |         |
|                                                 | Yes                | 14 075      |                     |         |                      |         | 0.659 (0.633; 0.686) |         | 0.659 (0.633; 0.687) |         | 0.644 (0.618; 0.671) |         |
| <b>GP PLA</b>                                   | 1 <sup>3</sup>     | 11 427      |                     |         |                      |         |                      |         | 1                    |         | 1                    |         |
|                                                 | 2                  | 13 767      |                     |         |                      |         |                      |         | 1.023 (0.968; 1.081) |         | 1.013 (0.958; 1.072) |         |
|                                                 | 3                  | 14 455      |                     |         |                      |         |                      |         | 1.027 (0.972; 1.084) |         | 1.018 (0.964; 1.076) |         |
|                                                 | 4                  | 20 582      |                     |         |                      |         |                      |         | 1.068 (1.015; 1.124) |         | 1.054 (1.002; 1.11)  |         |
|                                                 | 5                  | 26 405      |                     |         |                      |         |                      |         | 1.111 (1.058; 1.167) |         | 1.102 (1.048; 1.158) |         |
|                                                 | 6                  | 32 262      |                     |         |                      |         |                      |         | 1.118 (1.066; 1.173) |         | 1.103 (1.051; 1.158) |         |
|                                                 | 7                  | 50 863      |                     |         |                      |         |                      |         | 1.14 (1.089; 1.194)  |         | 1.126 (1.075; 1.18)  |         |
|                                                 | 8                  | 6 2331      |                     |         |                      |         |                      |         | 1.143 (1.092; 1.195) |         | 1.126 (1.076; 1.179) |         |
|                                                 | 9                  | 64 131      |                     |         |                      |         |                      |         | 1.106 (1.057; 1.157) |         | 1.096 (1.047; 1.148) |         |
|                                                 | 10                 | 69 724      |                     |         |                      |         |                      |         | 1.081 (1.033; 1.132) |         | 1.081 (1.032; 1.132) |         |
| <b>Referring physician</b>                      | No <sup>3</sup>    | 20 032      |                     |         |                      |         |                      |         |                      |         | 1                    |         |
|                                                 | Yes                | 345 915     |                     |         |                      |         |                      |         |                      |         | 8.45 (7.946; 8.996)  |         |

<sup>3</sup> Reference category

1  
2  
3  
4  
5  
6  
7  
8  
9  
10  
11  
12  
13  
14  
15  
16  
17  
18  
19  
20  
21  
22  
23  
24  
25  
26  
27  
28  
29  
30  
31  
32  
33  
34  
35  
36  
37  
38  
39  
40  
41  
42  
43  
44  
45  
46

For peer review only

**Table 3: Pap smear uptake multivariable logistic regression models in recommended age group (Pap smear uptake = 28.81%)**

|                                        |                    | N             | Model 1<br>LogLik   | Model 2<br>LogLik    | Model 3<br>LogLik    | Model 4<br>LogLik    | Model 5<br>LogLik    |
|----------------------------------------|--------------------|---------------|---------------------|----------------------|----------------------|----------------------|----------------------|
|                                        |                    | Total= 711803 | OR (95%CI) -424737  | OR (95%CI) -420964   | OR (95%CI) -420368   | OR (95%CI) -420310   | OR (95%CI) -411557   |
| <b>Combined</b>                        | 1 <sup>4</sup>     | 4 741         | 1                   | 1                    | 1                    | 1                    | 1                    |
| <b>EDI and large urban/other areas</b> | 2                  | 9 906         | 0.945 (0.923,0.968) | 0.936 (0.914,0.959)  | 0.939 (0.917,0.962)  | 0.929 (0.907,0.952)  | 0.922 (0.899,0.945)  |
|                                        | 3                  | 16 889        | 0.918 (0.894,0.942) | 0.902 (0.879,0.927)  | 0.908 (0.884,0.932)  | 0.897 (0.873,0.921)  | 0.889 (0.865,0.913)  |
|                                        | 4                  | 21 643        | 0.887 (0.863,0.912) | 0.878 (0.854,0.902)  | 0.886 (0.862,0.91)   | 0.878 (0.854,0.903)  | 0.873 (0.849,0.898)  |
|                                        | 5                  | 20 561        | 0.833 (0.811,0.855) | 0.816 (0.795,0.838)  | 0.826 (0.804,0.848)  | 0.817 (0.795,0.839)  | 0.816 (0.794,0.839)  |
|                                        | 6                  | 31 816        | 0.793 (0.772,0.815) | 0.781 (0.76,0.803)   | 0.792 (0.771,0.814)  | 0.78 (0.759,0.802)   | 0.781 (0.759,0.803)  |
| EDI (deciles)                          | 7                  | 31 628        | 0.801 (0.78,0.823)  | 0.788 (0.766,0.81)   | 0.8 (0.778,0.822)    | 0.791 (0.769,0.813)  | 0.805 (0.782,0.828)  |
| in large urban area                    | 8                  | 32 394        | 0.806 (0.784,0.829) | 0.788 (0.766,0.81)   | 0.806 (0.783,0.828)  | 0.801 (0.778,0.824)  | 0.81 (0.787,0.834)   |
|                                        | 9                  | 33 163        | 0.735 (0.716,0.754) | 0.716 (0.698,0.735)  | 0.738 (0.719,0.758)  | 0.729 (0.709,0.749)  | 0.748 (0.727,0.769)  |
|                                        | 10                 | 26 469        | 0.616 (0.601,0.631) | 0.602 (0.588,0.618)  | 0.643 (0.627,0.659)  | 0.636 (0.619,0.653)  | 0.66 (0.642,0.679)   |
|                                        | 1                  | 57 497        | 0.723 (0.678,0.773) | 0.735 (0.688,0.785)  | 0.737 (0.69,0.787)   | 0.749 (0.701,0.801)  | 0.747 (0.699,0.799)  |
|                                        | 2                  | 61 046        | 0.703 (0.671,0.738) | 0.72 (0.686,0.755)   | 0.724 (0.69,0.759)   | 0.731 (0.697,0.767)  | 0.732 (0.697,0.768)  |
|                                        | 3                  | 43 874        | 0.685 (0.659,0.711) | 0.704 (0.677,0.731)  | 0.707 (0.681,0.735)  | 0.715 (0.688,0.744)  | 0.716 (0.689,0.745)  |
| EDI (deciles)                          | 4                  | 38929         | 0.667 (0.644,0.69)  | 0.684 (0.661,0.709)  | 0.69 (0.666,0.714)   | 0.693 (0.669,0.718)  | 0.693 (0.669,0.718)  |
| in other area                          | 5                  | 44470         | 0.628 (0.606,0.651) | 0.645 (0.623,0.669)  | 0.65 (0.627,0.674)   | 0.655 (0.631,0.679)  | 0.659 (0.635,0.683)  |
|                                        | 6                  | 41648         | 0.608 (0.59,0.627)  | 0.626 (0.607,0.645)  | 0.632 (0.613,0.652)  | 0.631 (0.611,0.651)  | 0.637 (0.617,0.657)  |
|                                        | 7                  | 40648         | 0.619 (0.6,0.638)   | 0.637 (0.618,0.657)  | 0.647 (0.628,0.668)  | 0.646 (0.626,0.666)  | 0.648 (0.628,0.669)  |
|                                        | 8                  | 38018         | 0.591 (0.574,0.61)  | 0.61 (0.591,0.629)   | 0.621 (0.602,0.641)  | 0.62 (0.601,0.64)    | 0.622 (0.603,0.642)  |
|                                        | 9                  | 49069         | 0.559 (0.542,0.577) | 0.573 (0.556,0.591)  | 0.588 (0.57,0.607)   | 0.582 (0.564,0.601)  | 0.59 (0.571,0.609)   |
|                                        | 10                 | 67394         | 0.524 (0.506,0.542) | 0.533 (0.516,0.552)  | 0.556 (0.537,0.575)  | 0.552 (0.533,0.572)  | 0.562 (0.542,0.582)  |
| <b>Age (y.o)</b>                       | 25-30 <sup>4</sup> | 82413         |                     | 1                    | 1                    | 1                    | 1                    |
|                                        | 30-35              | 88249         |                     | 1.084 (1.062; 1.106) | 1.08 (1.059; 1.103)  | 1.081 (1.059; 1.104) | 1.06 (1.038; 1.082)  |
|                                        | 35-40              | 85200         |                     | 1.063 (1.042; 1.085) | 1.056 (1.035; 1.078) | 1.057 (1.035; 1.079) | 1.021 (1; 1.043)     |
|                                        | 40-45              | 92964         |                     | 1.031 (1.01; 1.052)  | 1.021 (1; 1.042)     | 1.021 (1.001; 1.042) | 0.963 (0.944; 0.984) |
|                                        | 45-50              | 94291         |                     | 0.988 (0.968; 1.008) | 0.975 (0.955; 0.995) | 0.975 (0.956; 0.996) | 0.906 (0.888; 0.925) |
|                                        | 50-55              | 88241         |                     | 0.826 (0.809; 0.843) | 0.811 (0.794; 0.828) | 0.812 (0.795; 0.829) | 0.749 (0.733; 0.765) |
|                                        | 55-60              | 83126         |                     | 0.655 (0.64; 0.669)  | 0.641 (0.627; 0.655) | 0.641 (0.627; 0.656) | 0.587 (0.574; 0.601) |
|                                        | 60-65              | 81209         |                     | 0.573 (0.56; 0.586)  | 0.558 (0.545; 0.57)  | 0.558 (0.546; 0.571) | 0.507 (0.496; 0.519) |
|                                        | 65                 | 16110         |                     | 0.468 (0.448; 0.488) | 0.454 (0.434; 0.474) | 0.454 (0.435; 0.474) | 0.413 (0.395; 0.431) |
| <b>CMU-C</b>                           | No <sup>4</sup>    | 655969        |                     |                      | 1                    | 1                    | 1                    |
|                                        | Yes                | 55834         |                     |                      | 0.696 (0.681; 0.711) | 0.695 (0.681; 0.71)  | 0.669 (0.655; 0.684) |
| <b>GP PLA (deciles)</b>                | 1 <sup>4</sup>     | 18607         |                     |                      |                      | 1                    | 1                    |
|                                        | 2                  | 24385         |                     |                      |                      | 0.966 (0.925; 1.01)  | 0.951 (0.909; 0.994) |
|                                        | 3                  | 26121         |                     |                      |                      | 0.982 (0.941; 1.026) | 0.97 (0.928; 1.013)  |
|                                        | 4                  | 37307         |                     |                      |                      | 1.004 (0.965; 1.046) | 0.989 (0.95; 1.031)  |
|                                        | 5                  | 49815         |                     |                      |                      | 1.01 (0.971; 1.05)   | 0.991 (0.952; 1.03)  |
|                                        | 6                  | 63615         |                     |                      |                      | 1.033 (0.994; 1.073) | 1.017 (0.978; 1.056) |
|                                        | 7                  | 98949         |                     |                      |                      | 1.049 (1.011; 1.088) | 1.031 (0.993; 1.069) |
|                                        | 8                  | 123460        |                     |                      |                      | 1.086 (1.048; 1.126) | 1.068 (1.03; 1.108)  |
|                                        | 9                  | 127253        |                     |                      |                      | 1.056 (1.018; 1.095) | 1.046 (1.009; 1.086) |
|                                        | 10                 | 142291        |                     |                      |                      | 1.03 (0.993; 1.069)  | 1.049 (1.011; 1.088) |
| <b>Referring physician</b>             | No <sup>4</sup>    | 57596         |                     |                      |                      |                      | 1                    |
|                                        | Yes                | 654207        |                     |                      |                      |                      | 5.389 (5.227; 5.557) |

<sup>4</sup> Reference category

#### 4. Discussion

Our study highlighted a link between deprivation and breast and cervical cancers screening uptake, in and outside the recommended age groups. This link follows a social gradient across all socioeconomic levels. The gradient was stronger in large urban areas. The successive inclusion of variables indicating financial precarity, healthcare accessibility, and adherence to the healthcare system decreased only very slightly the association, suggesting that these variables explain a very limited extent of the link between EDI and screening uptake. The social and territorial disparities in mammography uptake were lower in the recommended age group than outside.

The main strength of our study is its power and comprehensiveness, achieved by using health insurance data. Using both individual and contextual variables to investigate the link between an ecological deprivation index and screening uptake is original. Another original aspect is the exploration of screening uptake outside the recommended age groups and the observation of two different implementation modes for national recommendations (with and without a screening programme). Our study also has limitations. As our data covered only 1 year, we could not differentiate between women who had screening tests every year (more often than recommended) and the ones who had it every two and three years as recommended. It raises the question of excess screening and its link with SEP. In our dataset, pap smears prescribed for diagnostic purposes could not be distinguished from those performed in a screening context. The limited number of individual and contextual variables in our dataset restrained our capability to disentangle what could be explained by contextual and individual properties in the associations we observed with EDI. The same difficulty limited the exploration of financial, physical, and sociocultural accessibility mechanisms involved in the social gradient.

1  
2  
3 We complemented existing literature on social inequalities in access to mammography and  
4 pap smear. The link between deprivation and screening participation was found in numerous  
5 countries all over the world, irrespective of the local healthcare policy. In the United States,  
6 where no centrally organised cancer screening programme exists, this link was repeatedly  
7 reported at an individual and at an area levels (22–25). In most Western European countries,  
8 nationally organised screening programmes are in place. The studies conducted there also  
9 showed an impact of SEP (26–28). In France, the lack of individual socioeconomic variable in  
10 healthcare datasets has made it difficult to obtain large and representative evidence. A few  
11 cohort studies have been conducted, but were limited by the relatively small sample size  
12 (7,29,30). Using healthcare insurance reimbursement data merged with sociodemographic  
13 information made it possible to assess the impact of socioterritorial inequalities in larger  
14 studies, more representative of the French population (31).

15  
16  
17  
18  
19  
20  
21  
22  
23  
24  
25  
26  
27  
28  
29  
30  
31 Our study tried to identify some of the mechanisms involved in the link between deprivation  
32 and screening uptake. One of our hypotheses was that deprivation leads to limitations of the  
33 three dimensions of healthcare accessibility: financial, physical, and sociocultural. We used  
34 CMU-C to explore the effect of financial precarity in the link between deprivation and  
35 screening uptake and GP PLA, a proxy for healthcare supply, to reflect physical accessibility.  
36 Our result suggests that the association between deprivation and screening uptake is very  
37 slightly influenced by these variables. This could be due to the choice of variables used in our  
38 model. CMU-C may not be enough precise to measure financial accessibility. GP PLA is a  
39 good proxy for physical accessibility to primary care, but maybe not to specialty care.  
40  
41  
42  
43  
44  
45  
46  
47  
48  
49  
50  
51  
52  
53  
54  
55  
56  
57  
58  
59  
60

1  
2  
3 Crockett explained that the most deprived people focus more on present time (32). They  
4 concentrate on the inconvenience of the screening rather than on the possible long-term  
5 benefits. A measure of this mechanism, the fear of the result, language barriers or cultural  
6 representations (33) could be better proxies for sociocultural accessibility.  
7  
8  
9

10  
11  
12  
13 However, our study suggests that having a referring physician has a substantial direct impact  
14 on pap smear and mammography uptake. This key role of primary care providers was  
15 observed in other countries, like the United States and Canada (34,35). The improvement in  
16 screening uptake in people with a referring physician could be due to the direct role of the  
17 physician in overcoming the barriers to screening. This result might also be explained by  
18 another phenomenon linked to healthcare access: the patient's understanding of and capacity  
19 to navigate the healthcare system.  
20  
21  
22  
23  
24  
25  
26  
27  
28  
29

30 We confirmed territorial disparities in screening access. Large urban areas had higher  
31 participation rates than the rest of the region. These rural/urban disparities were observed in  
32 several studies in Western Europe and North America (17–19,28,36,37). The social gradient  
33 also appeared generally stronger in large urban areas. But even in the other areas, the most  
34 deprived populations had a lower screening access. These results corroborate the assumption  
35 that the social gradient is stronger if the healthcare supply is sufficient, but access to care of  
36 the most deprived remains lower whatever the place.  
37  
38  
39  
40  
41  
42  
43  
44  
45

46 We observed that the social and territorial disparities in mammography uptake were lower  
47 inside the recommended age group than for younger women. We did not observe the same  
48 trend for pap smear uptake. This difference could be explained by the nationally organised  
49 screening programme in place for breast cancer at the time of data collection but not for  
50 cervical cancer. Some studies suggested that tools used in the breast cancer screening  
51 programme might help decrease inequalities of access (38,39), but other showed that a  
52  
53  
54  
55  
56  
57  
58  
59  
60



1  
2  
3 national programme, with the exact same actions for every women, while improving overall  
4 participation rates, could also increase the social gradient in uptake (40). Pap smear and  
5 mammography uptake also appeared very high in women younger than the recommended age.  
6  
7 While the social gradient within the recommended age groups is likely to be explained by a  
8 low uptake in deprived populations, its existence among younger and older women may  
9  
10 indicate an overuse of screening in high SEP populations (41). Regarding women older than  
11  
12 the recommended age, we observed a higher effect of territorial disparities on screening  
13  
14 uptake (rural/urban disparities and effect of GP accessibility). This suggests that older women  
15  
16 could have more difficulty adapting to territorial barriers.  
17  
18  
19  
20  
21  
22

23  
24 Developing global dataset combining health data and diverse socioeconomic data, at  
25  
26 individual and contextual levels, could enable a better understanding of the mechanisms  
27  
28 involved in this social gradient, and therefore the development of targeted territorial actions to  
29  
30 improve equity of access to healthcare.  
31  
32  
33  
34  
35  
36  
37  
38  
39  
40  
41  
42  
43  
44  
45  
46  
47  
48  
49  
50  
51  
52  
53  
54  
55  
56  
57  
58  
59  
60

1  
2  
3 Author contributions: LO: Conceptualisation, Methodology, Formal analysis, Funding  
4 acquisition, Writing – original draft and review & editing. CD: Conceptualisation,  
5 Methodology, Formal analysis, Supervision, Validation. PG: Conceptualisation, Data  
6 curation, Methodology, Formal analysis, Supervision, Validation. MERB: Conceptualisation,  
7 Funding acquisition, Validation. SL: Methodology, Formal analysis, Writing – review,  
8 Validation. VD: Writing – review, Validation.

9  
10  
11  
12  
13  
14  
15  
16  
17 All authors read, edited, and approved the final manuscript.

18  
19  
20  
21  
22  
23 Acknowledgments:

24  
25  
26 We gratefully acknowledge Sarah Ouanhnon for her translation help and her many advice.

27  
28 Many thanks to Hervé Mainsonneuve for his careful reading and his precious advice. We wish  
29 to thank all the members of the research team: Marine Maurel for her skills with R-software,  
30 Camille Joanes for her advice, and all the other members. The research team is supported by  
31 the French association “La Ligue contre le cancer”.

32  
33  
34  
35  
36  
37  
38  
39  
40  
41 Data availability statements: This study is conformed to the principles embodied in the  
42 Declaration of Helsinki. The data we used in this study belongs to the French National Health  
43 Insurance. The procurement of such data necessitates the agreement of the French National  
44 Institute of Health Data (INDS) and the permission from the ‘Commission Nationale  
45 Informatique et Liberte’s’ (CNIL) which is the French Data Protection Authority in  
46 accordance with Law No 78/17 of 6 January 1978 on computing, files and personal  
47 information, article 54, paragraph I. Data cannot be diffused without these authorisations. A  
48 CNIL Authorisation (no. 1634837) was obtained for our study. In addition, data cannot be  
49  
50  
51  
52  
53  
54  
55  
56  
57  
58  
59  
60

1  
2  
3 shared with anyone who does not have these authorisations. In our study, the Regional Health  
4 Agency of Occitanie completed the necessary formalities with the relevant authorities. If other  
5 authors want to obtain the data, they have to contact directly the French National Institute of  
6 Health Data and obtain the permission of the CNIL. It can be done on the INDS website  
7 (<http://www.indsante.fr/>). In addition, data regarding demographical characteristics of the  
8 whole inhabitants of the region can be freely obtained from the French national institute for  
9 statistics and economic studies (<https://www.insee.fr/fr/statistiques/>).

10  
11  
12  
13  
14  
15  
16  
17  
18  
19 Ethics statement: According to French registration, the ethics Committee approval is not  
20 applicable for this study (on pre-existing dataset).

21  
22  
23 This study is conformed to the principles embodied in the Declaration of Helsinki. The  
24 authors obtained an agreement of the French National Institute of Health Data (INDS) and the  
25 permission from the ‘Commission Nationale Informatique et Liberte’s’ (CNIL) which is the  
26 French Data Protection Authority in accordance with Law No 78/17 of 6 January 1978 on  
27 computing, files and personal information, article 54, paragraph I. CNIL Authorisation: no.  
28 1634837.

29  
30  
31  
32  
33  
34 Funding Statement: This work was supported by Toulouse Hospital (“allocation jeune  
35 chercheur de la DRCI”, Direction de la Recherche Clinique et de l’Innovation). There is no  
36 grant number: Toulouse Hospital allocates this grant to young doctors who wish to deepen  
37 their knowledge in research, after studying their research project.

38  
39  
40  
41  
42  
43  
44 Declaration of Competing Interest: The authors have declared that no competing interests  
45 exist.

## 46 47 48 49 50 References

- 51  
52  
53 1. International Agency for research on Cancer. Estimated number of deaths in 2020, breast,  
54 females, all ages: IARC Gobocan [Internet]. Available from: [https://gco.iarc.fr/today/online-analysis-table?v=2020&mode=population&mode\\_population=countries&population=900&populations=900&key=asr&sex=2&cancer=20&type=1&statistic=5&prevalence=0&population\\_group=0&age\\_s\\_group%5B%5D=0&ages\\_group%5B%5D=17&group\\_cancer=1&include\\_nmsc=1&include\\_nmsc\\_other=1](https://gco.iarc.fr/today/online-analysis-table?v=2020&mode=population&mode_population=countries&population=900&populations=900&key=asr&sex=2&cancer=20&type=1&statistic=5&prevalence=0&population_group=0&age_s_group%5B%5D=0&ages_group%5B%5D=17&group_cancer=1&include_nmsc=1&include_nmsc_other=1)

- 1  
2  
3 2. Institut National du Cancer. Le programme de dépistage organisé - Dépistage du cancer du sein  
4 [Internet]. cancer.fr. 2019. Available from: [https://www.e-cancer.fr/Professionnels-de-](https://www.e-cancer.fr/Professionnels-de-sante/Depistage-et-detection-precoce/Depistage-du-cancer-du-sein/Le-programme-de-depistage-organise)  
5 [sante/Depistage-et-detection-precoce/Depistage-du-cancer-du-sein/Le-programme-de-](https://www.e-cancer.fr/Professionnels-de-sante/Depistage-et-detection-precoce/Depistage-du-cancer-du-sein/Le-programme-de-depistage-organise)  
6 [depistage-organise](https://www.e-cancer.fr/Professionnels-de-sante/Depistage-et-detection-precoce/Depistage-du-cancer-du-sein/Le-programme-de-depistage-organise)  
7
- 8  
9 3. INCA. Le programme de dépistage organisé du cancer du col de l'utérus - Dépistage du cancer  
10 du col de l'utérus [Internet]. Available from: [https://www.e-cancer.fr/Professionnels-de-](https://www.e-cancer.fr/Professionnels-de-sante/Depistage-et-detection-precoce/Depistage-du-cancer-du-col-de-l-uterus/Le-programme-de-depistage-organise)  
11 [sante/Depistage-et-detection-precoce/Depistage-du-cancer-du-col-de-l-uterus/Le-programme-](https://www.e-cancer.fr/Professionnels-de-sante/Depistage-et-detection-precoce/Depistage-du-cancer-du-col-de-l-uterus/Le-programme-de-depistage-organise)  
12 [de-depistage-organise](https://www.e-cancer.fr/Professionnels-de-sante/Depistage-et-detection-precoce/Depistage-du-cancer-du-col-de-l-uterus/Le-programme-de-depistage-organise)  
13
- 14 4. Santé publique France. Evaluation du programme de dépistage du cancer du col de l'utérus  
15 [Internet]. [cited 2020 May 13]. Available from: [http://santepubliquefrance.fr/maladies-et-](http://santepubliquefrance.fr/maladies-et-traumatismes/cancers/cancer-du-col-de-l-uterus/articles/evaluation-du-programme-de-depistage-du-cancer-du-col-de-l-uterus)  
16 [traumatismes/cancers/cancer-du-col-de-l-uterus/articles/evaluation-du-programme-de-](http://santepubliquefrance.fr/maladies-et-traumatismes/cancers/cancer-du-col-de-l-uterus/articles/evaluation-du-programme-de-depistage-du-cancer-du-col-de-l-uterus)  
17 [depistage-du-cancer-du-col-de-l-uterus](http://santepubliquefrance.fr/maladies-et-traumatismes/cancers/cancer-du-col-de-l-uterus/articles/evaluation-du-programme-de-depistage-du-cancer-du-col-de-l-uterus)  
18
- 19 5. Poiseuil M, Coureau G, Payet C, Savès M, Debled M, Mathoulin-Pelissier S, et al. Deprivation  
20 and mass screening: Survival of women diagnosed with breast cancer in France from 2008 to  
21 2010. *Cancer Epidemiol.* 2019;60:149–55.  
22
- 23 6. Duport N, Serra D, Goulard H, Bloch J. Quels facteurs influencent la pratique du dépistage des  
24 cancers féminins en France ? *Revue d'Épidémiologie et de Santé Publique.* 2008 Oct  
25 1;56(5):303–13.  
26
- 27 7. Grillo F, Vallée J, Chauvin P. Inequalities in cervical cancer screening for women with or without  
28 a regular consulting in primary care for gynaecological health, in Paris, France. *Prev Med.* 2012  
29 Apr;54(3–4):259–65.  
30
- 31 8. Delpierre C, Fantin R, Chehoud H, Nicoules V, Bayle A, Souche A, et al. Inégalités sociales  
32 d'accès aux soins et à la prévention en Midi-Pyrénées, France, 2012. 2016; Available from:  
33 [http://invs.santepubliquefrance.fr//beh/2016/1/2016\\_1\\_1.html](http://invs.santepubliquefrance.fr//beh/2016/1/2016_1_1.html)  
34
- 35 9. Evans DB, Hsu J, Boerma T. Universal health coverage and universal access. *Bull World Health*  
36 *Organ.* 2013 Aug;91:546-546A.  
37
- 38 10. Thiede M, Akweongo P, McIntyre D. Exploring the dimensions of access. In: McIntyre D,  
39 Mooney G, editors. *The Economics of Health Equity* [Internet]. Cambridge: Cambridge  
40 University Press; 2007 [cited 2020 Jun 8]. p. 103–23. Available from:  
41 [https://www.cambridge.org/core/books/economics-of-health-equity/exploring-the-](https://www.cambridge.org/core/books/economics-of-health-equity/exploring-the-dimensions-of-access/684DFDF7B640370D207C59FEAFC967E7)  
42 [dimensions-of-access/684DFDF7B640370D207C59FEAFC967E7](https://www.cambridge.org/core/books/economics-of-health-equity/exploring-the-dimensions-of-access/684DFDF7B640370D207C59FEAFC967E7)  
43
- 44 11. HCSP. Les systèmes d'information pour la santé publique [Internet]. Paris: Haut Conseil de la  
45 Santé Publique; 2009 Nov [cited 2019 Mar 10]. Available from:  
46 <https://www.hcsp.fr/explore.cgi/avisrapportsdomaine?clefr=175>  
47
- 48 12. Ducros D, Nicoules V, Chehoud H, Bayle A, Souche A, Tanguy M, et al. Les bases médico-  
49 administratives pour mesurer les inégalités sociales de santé. *Sante Publique.* 2015 Aug 24;Vol.  
50 27(3):383–94.  
51
- 52 13. Pornet C, Delpierre C, Dejardin O, Grosclaude P, Launay L, Guittet L, et al. Construction of an  
53 adaptable European transnational ecological deprivation index: the French version. *J Epidemiol*  
54 *Community Health.* 2012 Nov;66(11):982–9.  
55  
56  
57  
58  
59  
60

14. Yang XY, Hu A, Schieman S. Relative deprivation in context: How contextual status homogeneity shapes the relationship between disadvantaged social status and health. *Social Science Research*. 2019 Jul 1;81:157–69.
15. Muriel Barlet, Magali Coldefy, Clémentine Collin, Véronique Lucas-Gabrielli. L'Accessibilité potentielle localisée (APL) : une nouvelle mesure de l'accessibilité aux soins appliquée aux médecins généralistes libéraux en France [Internet]. Drees; 2012. Available from: <https://drees.solidarites-sante.gouv.fr/etudes-et-statistiques/publications/documents-de-travail/serie-etudes-et-recherche/article/l-accessibilite-potentielle-localisee-apl-une-nouvelle-mesure-de-l>
16. Short SE, Mollborn S. Social Determinants and Health Behaviors: Conceptual Frames and Empirical Advances. *Curr Opin Psychol*. 2015 Oct;5:78–84.
17. Chandak A, Nayar P, Lin G. Rural-Urban Disparities in Access to Breast Cancer Screening: A Spatial Clustering Analysis. *J Rural Health*. 2019;35(2):229–35.
18. Orwat J, Caputo N, Key W, De Sa J. Comparing Rural and Urban Cervical and Breast Cancer Screening Rates in a Privately Insured Population. *Soc Work Public Health*. 2017;32(5):311–23.
19. Leung J, McKenzie S, Martin J, McLaughlin D. Effect of rurality on screening for breast cancer: a systematic review and meta-analysis comparing mammography. *Rural Remote Health*. 2014;14(2):2730.
20. INSEE (Institut National de la Statistique et des Etudes Economiques). Le nouveau zonage en aires urbaines de 2010 - Insee Première - 1374 [Internet]. 2010 [cited 2021 Nov 26]. Available from: <https://www.insee.fr/fr/statistiques/1281191>
21. R Core Team. R: A language and environment for statistical computing. [Internet]. 2013. Available from: <http://www.R-project.org/>
22. Smith RA, Andrews KS, Brooks D, Fedewa SA, Manassaram-Baptiste D, Saslow D, et al. Cancer screening in the United States, 2019: A review of current American Cancer Society guidelines and current issues in cancer screening. *CA: A Cancer Journal for Clinicians*. 2019;69(3):184–210.
23. Dailey AB, Kasl SV, Holford TR, Calvocoressi L, Jones BA. Neighborhood-Level Socioeconomic Predictors of Nonadherence to Mammography Screening Guidelines. *Cancer Epidemiol Biomarkers Prev*. 2007 Nov 1;16(11):2293–303.
24. Dailey AB, Brumback BA, Livingston MD, Jones BA, Curbow BA, Xu X. Area-Level Socioeconomic Position and Repeat Mammography Screening Use: Results from the 2005 National Health Interview Survey. *Cancer Epidemiol Biomarkers Prev*. 2011 Nov 1;20(11):2331–44.
25. Murfin J, Irvine F, Meechan-Rogers R, Swift A. Education, income and occupation and their influence on the uptake of cervical cancer prevention strategies: A systematic review. *J Clin Nurs*. 2020 Feb;29(3–4):393–415.
26. Borràs JM, Guillen M, Sanchez V, Juncà S, Vicente R. Educational level, voluntary private health insurance and opportunistic cancer screening among women in Catalonia (Spain): *European Journal of Cancer Prevention*. 1999 Oct;8(5):427–34.

- 1
- 2
- 3 27. Douglas E, Waller J, Duffy SW, Wardle J. Socioeconomic inequalities in breast and cervical
- 4 screening coverage in England: are we closing the gap? *J Med Screen*. 2016;23(2):98–103.
- 5
- 6 28. Massat NJ, Douglas E, Waller J, Wardle J, Duffy SW. Variation in cervical and breast cancer
- 7 screening coverage in England: a cross-sectional analysis to characterise districts with atypical
- 8 behaviour. *BMJ Open*. 2015 Jul 24;5(7):e007735.
- 9
- 10 29. Eisinger F, Viguier J, Touboul C, Coscas Y, Pivot X, Blay J-Y, et al. Social stratification, risk factor
- 11 prevalence and cancer screening attendance. *Eur J Cancer Prev*. 2015 Jun;24 Suppl:S77-81.
- 12
- 13 30. Chauvin P, Parizot I. Les inégalités sociales et territoriales de santé dans l'agglomération
- 14 parisienne. Une analyse de la cohorte Sirs (2005) [Internet]. Délégation interministérielle à la
- 15 Ville; 2009 [cited 2020 Jun 1]. Available from: <https://www.hal.inserm.fr/inserm-00415971>
- 16
- 17 31. Deborde T, Chatignoux E, Quintin C, Beltzer N, Hamers FF, Rogel A. Breast cancer screening
- 18 programme participation and socioeconomic deprivation in France. *Prev Med*. 2018;115:53–60.
- 19
- 20 32. Crockett R, Wilkinson TM, Marteau TM. Social patterning of screening uptake and the impact of
- 21 facilitating informed choices: psychological and ethical analyses. *Health Care Anal*. 2008
- 22 Mar;16(1):17–30.
- 23
- 24 33. Szarewski A, Cadman L, Ashdown-Barr L, Waller J. Exploring the acceptability of two self-
- 25 sampling devices for human papillomavirus testing in the cervical screening context: a
- 26 qualitative study of Muslim women in London. *J Med Screen*. 2009;16(4):193–8.
- 27
- 28 34. Schueler KM, Chu PW, Smith-Bindman R. Factors Associated with Mammography Utilization: A
- 29 Systematic Quantitative Review of the Literature. *Journal of Women's Health*. 2008 Oct
- 30 27;17(9):1477–98.
- 31
- 32 35. Beaulieu MD, Béland F, Roy D, Falardeau M, Hébert G. Factors determining compliance with
- 33 screening mammography. *CMAJ*. 1996 May 1;154(9):1335–43.
- 34
- 35 36. Ouédraogo S, Dabakuyo-Yonli TS, Roussot A, Dialla PO, Pornet C, Poillot M-L, et al. [Breast
- 36 cancer screening in thirteen French departments]. *Bull Cancer*. 2015 Feb;102(2):126–38.
- 37
- 38 37. Ouédraogo S, Dabakuyo-Yonli TS, Roussot A, Pornet C, Sarlin N, Lunaud P, et al. European
- 39 transnational ecological deprivation index and participation in population-based breast cancer
- 40 screening programmes in France. *Prev Med*. 2014 Jun;63:103–8.
- 41
- 42 38. Cancer Care Ontario. Cancer Fact: Invitation letters improve breast screening behaviour
- 43 [Internet]. 2016 [cited 2020 May 13]. Available from:
- 44 [https://www.cancercareontario.ca/en/cancer-facts/invitation-letters-improve-breast-](https://www.cancercareontario.ca/en/cancer-facts/invitation-letters-improve-breast-screening-behaviour)
- 45 [screening-behaviour](https://www.cancercareontario.ca/en/cancer-facts/invitation-letters-improve-breast-screening-behaviour)
- 46
- 47 39. Everett T, Bryant A, Griffin MF, Martin-Hirsch PP, Forbes CA, Jepson RG. Interventions targeted
- 48 at women to encourage the uptake of cervical screening. *Cochrane Database of Systematic*
- 49 *Reviews* [Internet]. 2011 [cited 2019 Oct 16];(5). Available from:
- 50 <https://www.cochranelibrary.com/cdsr/doi/10.1002/14651858.CD002834.pub2/full>
- 51
- 52 40. Raginel T, de Mil R, Garnier A, Launoy G, Guittet L. National organization of uterine cervical
- 53 cancer screening and social inequality in France. *European Journal of Cancer Prevention*
- 54 [Internet]. 2019 Dec 10 [cited 2020 Jun 1]; Publish Ahead of Print. Available from:
- 55
- 56
- 57
- 58
- 59
- 60

1  
2  
3 [https://journals.lww.com/eurjcancerprev/Abstract/9000/National\\_organization\\_of\\_uterine\\_cervical\\_cancer.99158.aspx](https://journals.lww.com/eurjcancerprev/Abstract/9000/National_organization_of_uterine_cervical_cancer.99158.aspx)

- 4  
5  
6 41. Autier P. [Screening for breast cancer: worries about its effectiveness]. Rev Prat. 2013  
7 Dec;63(10):1369–77.  
8  
9  
10  
11  
12  
13  
14  
15  
16

17 **Figure 1: Conceptual model**

18  
19 *Links between the studied variables assumed to explain the impact of deprivation on screening uptake, depending*  
20 *on the level of urbanisation.*  
21

22  
23  
24 **Figure 2: Mammography and pap smear uptake and combined variable EDI in large urban/other areas by age group,**  
25 **Midi Pyrenees region, 2012.**

26 *Results from a logistic model adjusted for EDI by age, CMU-C, GP PLA, having an official referring physician.*  
27 *Data from models 5 (Table 2 and 3) for the recommended age groups.*  
28  
29  
30  
31  
32  
33  
34  
35  
36  
37  
38  
39  
40  
41  
42  
43  
44  
45  
46  
47  
48  
49  
50  
51  
52  
53  
54  
55  
56  
57  
58  
59  
60

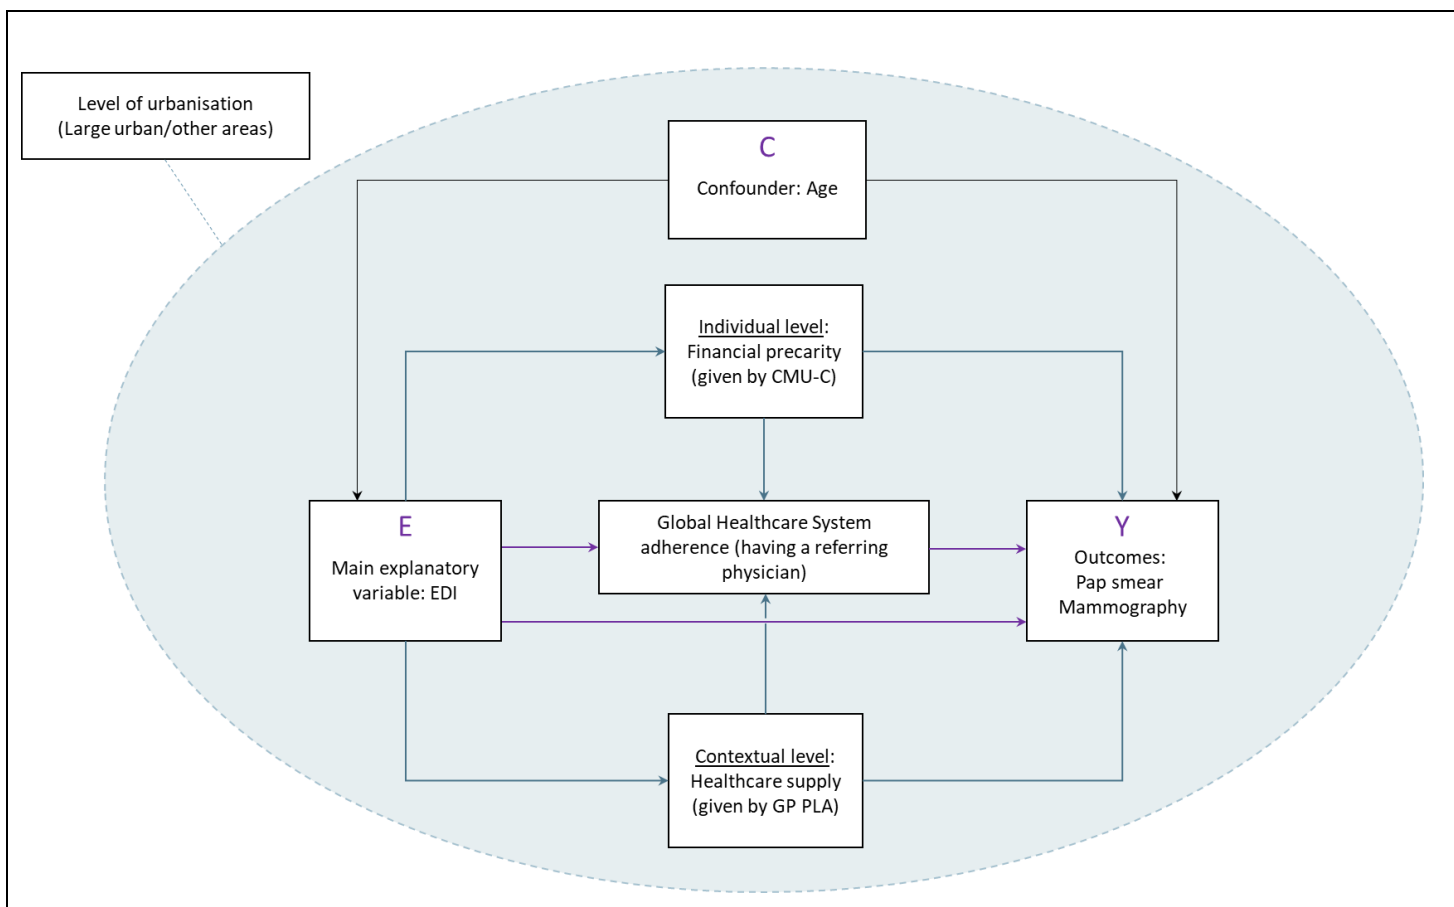

**Figure 1: Conceptual model**

*Links between the studied variables assumed to explain the impact of deprivation on screening uptake, depending on the level of urbanisation.*

view only



**Figure 2: Mammography and pap smear uptake and combined variable EDI in large urban/other areas by age group, Midi Pyrenees region, 2012.**

Results from a logistic model adjusted for EDI by age, CMU-C, GP PLA, having an official referring physician. Data from models 5 (Table 2 and 3) for the recommended age groups.

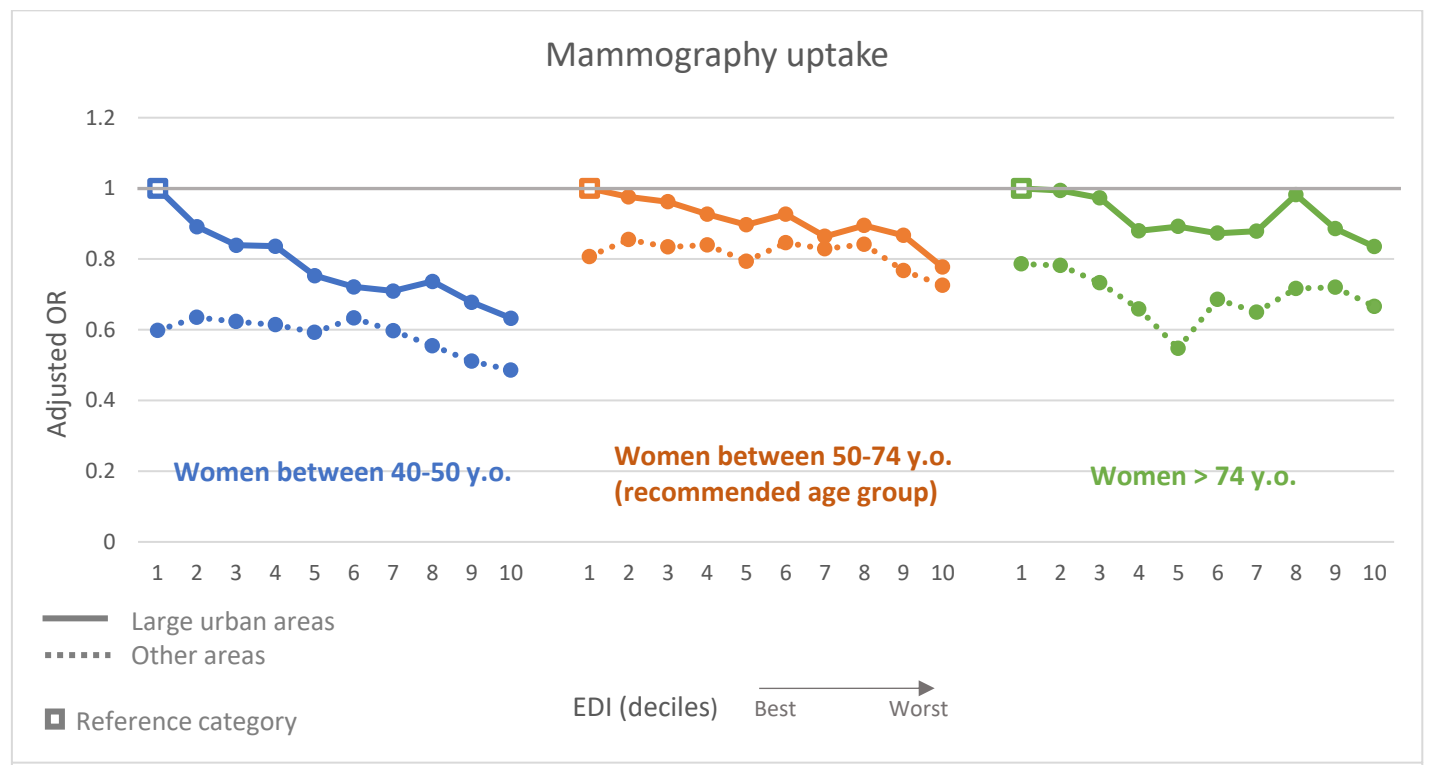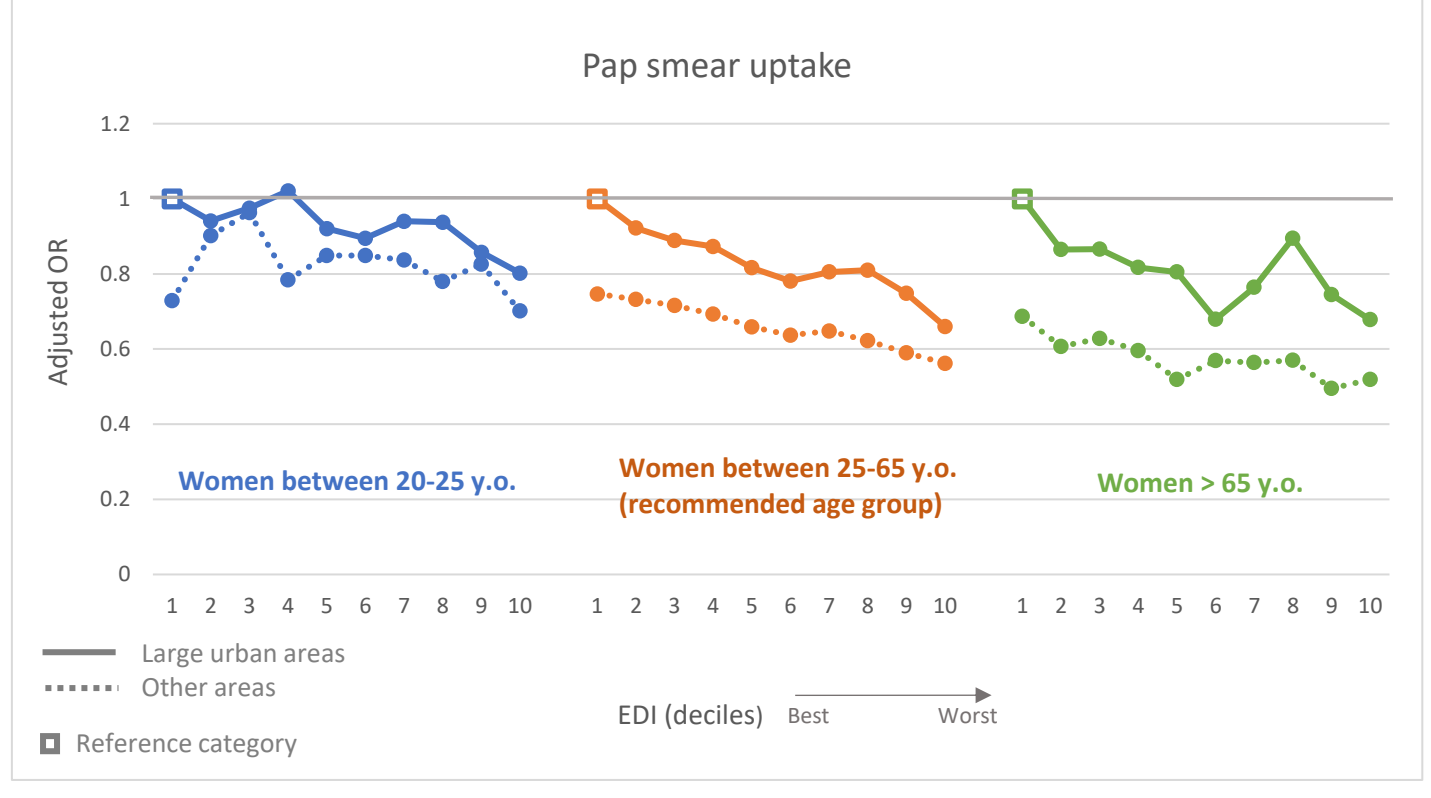

## Supplementary material

### *Tables A: Characteristics of women in recommended age groups for gynaecological screening programmes in Midi Pyrénées*

| <b>Characteristics of women between 50 and 74 y.o. (recommended age group for mammography)</b> |                            |                               |                    |
|------------------------------------------------------------------------------------------------|----------------------------|-------------------------------|--------------------|
| <b>N= 365 947</b>                                                                              |                            |                               |                    |
|                                                                                                | <b>Toulouse Metropolis</b> | <b>Other large urban area</b> | <b>Other area</b>  |
|                                                                                                | n= 72919 (19.93%)          | n= 150755 (41.2%)             | n= 142273 (38.88%) |
|                                                                                                | n (%)                      | n (%)                         | n (%)              |
| <b>Mammography</b>                                                                             |                            |                               |                    |
| No Mammography                                                                                 | 49978 (68.54)              | 102663 (68.1)                 | 100713 (70.79)     |
| ≥ 1 in the year                                                                                | 22941 (31.46)              | 48092 (31.9)                  | 41560 (29.21)      |
| <b>Age</b>                                                                                     |                            |                               |                    |
| Mean (SD)                                                                                      | 60.7 (6.8)                 | 60.9 (6.9)                    | 61.6 (6.9)         |
| <b>Age (/5years)</b>                                                                           |                            |                               |                    |
| 50-55 y.o                                                                                      | 19112 (26.21)              | 37568 (24.92)                 | 31561 (22.18)      |
| 55-60 y.o                                                                                      | 17097 (23.45)              | 34985 (23.21)                 | 31044 (21.82)      |
| 60-65 y.o                                                                                      | 15774 (21.63)              | 33460 (22.19)                 | 31975 (22.47)      |
| 65-70 y.o,                                                                                     | 12305 (16.87)              | 25825 (17.13)                 | 26664 (18.74)      |
| 70-75 y.o                                                                                      | 8631 (11.84)               | 18917 (12.55)                 | 21029 (14.78)      |
| <b>EDI (deciles: 1=best)</b>                                                                   |                            |                               |                    |
| 1                                                                                              | 7886 (10.81)               | 20596 (13.66)                 | 2719 (1.91)        |
| 2                                                                                              | 8615 (11.81)               | 20315 (13.48)                 | 5896 (4.14)        |
| 3                                                                                              | 4436 (6.08)                | 15563 (10.32)                 | 10112 (7.11)       |
| 4                                                                                              | 3484 (4.78)                | 14848 (9.85)                  | 13232 (9.3)        |
| 5                                                                                              | 8183 (11.22)               | 11820 (7.84)                  | 12730 (8.95)       |
| 6                                                                                              | 3368 (4.62)                | 16244 (10.78)                 | 19906 (13.99)      |
| 7                                                                                              | 6678 (9.16)                | 12055 (8)                     | 20092 (14.12)      |
| 8                                                                                              | 6367 (8.73)                | 10760 (7.14)                  | 20741 (14.58)      |
| 9                                                                                              | 9519 (13.05)               | 12192 (8.09)                  | 20679 (14.53)      |
| 10                                                                                             | 14383 (19.72)              | 16362 (10.85)                 | 16166 (11.36)      |
| <b>CMU-C</b>                                                                                   |                            |                               |                    |
| No CMU-C                                                                                       | 68850 (94.42)              | 145641 (96.61)                | 137381 (96.56)     |
| CMU-C                                                                                          | 4069 (5.58)                | 5114 (3.39)                   | 4892 (3.44)        |
| <b>GP PLA (deciles: 10= best)</b>                                                              |                            |                               |                    |
| 1                                                                                              | 363 (0.5)                  | 1744 (1.16)                   | 9320 (6.55)        |
| 2                                                                                              | 922 (1.26)                 | 4887 (3.24)                   | 7958 (5.59)        |
| 3                                                                                              | 0 (0)                      | 6290 (4.17)                   | 8165 (5.74)        |
| 4                                                                                              | 803 (1.1)                  | 9625 (6.38)                   | 10154 (7.14)       |
| 5                                                                                              | 1409 (1.93)                | 14229 (9.44)                  | 10767 (7.57)       |
| 6                                                                                              | 2695 (3.7)                 | 17381 (11.53)                 | 12186 (8.57)       |
| 7                                                                                              | 9531 (13.07)               | 25353 (16.82)                 | 15979 (11.23)      |
| 8                                                                                              | 14772 (20.26)              | 25147 (16.68)                 | 22412 (15.75)      |
| 9                                                                                              | 15456 (21.2)               | 27726 (18.39)                 | 20949 (14.72)      |
| 10                                                                                             | 26968 (36.98)              | 18373 (12.19)                 | 24383 (17.14)      |
| <b>Referring physician</b>                                                                     |                            |                               |                    |
| No designated referring physician                                                              | 4898 (6.72)                | 7428 (4.93)                   | 7706 (5.42)        |
| Official referring physician                                                                   | 68021 (93.28)              | 143327 (95.07)                | 134567 (94.58)     |

## Characteristics of women between 25 and 65 y.o. (recommended age group for pap smear)

N= 711 803

|                                   | Toulouse Metropolis | Other large urban areas | Other areas       |
|-----------------------------------|---------------------|-------------------------|-------------------|
|                                   | n= 180030 (25.59%)  | n= 302563 (42.61%)      | n= 229210 (32.2%) |
|                                   | n (%)               | n (%)                   | n (%)             |
| <b>Pap smear</b>                  |                     |                         |                   |
| No Pap smear                      | 123038 (68.34)      | 211072 (69.76)          | 172621 (75.31)    |
| ≥ 1 in the year                   | 56992 (31.66)       | 91491 (30.24)           | 56589 (24.69)     |
| <b>Age</b>                        |                     |                         |                   |
| Mean (SD)                         | 42.9 (11.8)         | 45.5 (11.4)             | 47.2 (11.4)       |
| <b>Age (/5years)</b>              |                     |                         |                   |
|                                   | n= 180030           | n= 302563               | n= 229210         |
| 25-30 y.o                         | 30798 (17.11)       | 32111 (10.61)           | 19504 (8.51)      |
| 30-35 y.o                         | 28146 (15.63)       | 36721 (12.14)           | 23382 (10.2)      |
| 35-40 y.o                         | 23292 (12.94)       | 37351 (12.34)           | 24557 (10.71)     |
| 40-45 y.o                         | 21537 (11.96)       | 41983 (13.88)           | 29444 (12.85)     |
| 45-50 y.o                         | 21259 (11.81)       | 41829 (13.82)           | 31203 (13.61)     |
| 50-55 y.o                         | 19112 (10.62)       | 37568 (12.42)           | 31561 (13.77)     |
| 55-60 y.o                         | 17097 (9.5)         | 34985 (11.56)           | 31044 (13.54)     |
| 60-65 y.o                         | 15774 (8.76)        | 33460 (11.06)           | 31975 (13.95)     |
| 65-70 y.o,                        | 3015 (1.67)         | 6555 (2.17)             | 6540 (2.85)       |
| <b>EDI (deciles: 1=best)</b>      |                     |                         |                   |
| 1                                 | 14747 (8.19)        | 42750 (14.13)           | 4741 (2.07)       |
| 2                                 | 19389 (10.77)       | 41657 (13.77)           | 9906 (4.32)       |
| 3                                 | 10922 (6.07)        | 32952 (10.89)           | 16889 (7.37)      |
| 4                                 | 8239 (4.58)         | 30690 (10.14)           | 21643 (9.44)      |
| 5                                 | 21020 (11.68)       | 23450 (7.75)            | 20561 (8.97)      |
| 6                                 | 9173 (5.1)          | 32475 (10.73)           | 31816 (13.88)     |
| 7                                 | 17062 (9.48)        | 23586 (7.8)             | 31628 (13.8)      |
| 8                                 | 17051 (9.47)        | 20967 (6.93)            | 32394 (14.13)     |
| 9                                 | 26337 (14.63)       | 22732 (7.51)            | 33163 (14.47)     |
| 10                                | 36090 (20.05)       | 31304 (10.35)           | 26469 (11.55)     |
| <b>CMU-C</b>                      |                     |                         |                   |
| No CMU-C                          | 161075 (89.47)      | 281794 (93.14)          | 213100 (92.97)    |
| CMU-C                             | 18955 (10.53)       | 20769 (6.86)            | 16110 (7.03)      |
| <b>GP PLA (deciles: 10= best)</b> |                     |                         |                   |
| 1                                 | 831 (0.46)          | 3162 (1.05)             | 14614 (6.38)      |
| 2                                 | 2273 (1.26)         | 9407 (3.11)             | 12705 (5.54)      |
| 3                                 | 0 (0%)              | 12683 (4.19)            | 13438 (5.86)      |
| 4                                 | 1815 (1.01)         | 18903 (6.25)            | 16589 (7.24)      |
| 5                                 | 3312 (1.84)         | 28690 (9.48)            | 17813 (7.77)      |
| 6                                 | 6666 (3.7)          | 36519 (12.07)           | 20430 (8.91)      |
| 7                                 | 20097 (11.16)       | 52821 (17.46)           | 26031 (11.36)     |
| 8                                 | 37194 (20.66)       | 51056 (16.87)           | 35210 (15.36)     |
| 9                                 | 38815 (21.56)       | 54907 (18.15)           | 33531 (14.63)     |
| 10                                | 69027 (38.34)       | 34415 (11.37)           | 38849 (16.95)     |
| <b>Referring physician</b>        |                     |                         |                   |
| No designated                     | 18754 (10.42)       | 20659 (6.83)            | 18183 (7.93)      |
| Designated                        | 161276 (89.58)      | 281904 (93.17)          | 211027 (92.07)    |

*Tables B: Screening uptake multivariable logistic regression models outside the recommended age groups (sequential adjustment)*

| Mammography uptake multivariable logistic regression models (n= 187255): in 40-50 y.o. women (Mammography uptake = 20.77%) |                                           |                         |             |                     |        |                      |        |                      |        |                      |        |                      |        |
|----------------------------------------------------------------------------------------------------------------------------|-------------------------------------------|-------------------------|-------------|---------------------|--------|----------------------|--------|----------------------|--------|----------------------|--------|----------------------|--------|
|                                                                                                                            |                                           |                         | N           | Model 1             | LogLik | Model 2              | LogLik | Model 3              | LogLik | Model 4              | LogLik | Model 5              | LogLik |
|                                                                                                                            |                                           |                         | Tot= 187255 | OR (95%CI)          | -94934 | OR (95%CI)           | -94709 | OR (95%CI)           | -94508 | OR (95%CI)           | -94463 | OR (95%CI)           | -92837 |
| <b>Combined EDI and large urban/other</b>                                                                                  | <b>EDI (deciles) in large urban areas</b> | 1 <sup>1</sup>          | 1284        | 1                   |        | 1                    |        | 1                    |        | 1                    |        | 1                    |        |
|                                                                                                                            |                                           | 2                       | 2737        | 0.899 (0.857,0.944) |        | 0.901 (0.859,0.946)  |        | 0.906 (0.863,0.951)  |        | 0.897 (0.855,0.942)  |        | 0.892 (0.849,0.937)  |        |
|                                                                                                                            |                                           | 3                       | 4550        | 0.845 (0.801,0.892) |        | 0.847 (0.803,0.894)  |        | 0.855 (0.811,0.902)  |        | 0.843 (0.798,0.89)   |        | 0.839 (0.794,0.886)  |        |
|                                                                                                                            |                                           | 4                       | 5726        | 0.836 (0.791,0.884) |        | 0.84 (0.794,0.888)   |        | 0.851 (0.805,0.9)    |        | 0.84 (0.794,0.888)   |        | 0.837 (0.791,0.885)  |        |
|                                                                                                                            |                                           | 5                       | 5472        | 0.745 (0.705,0.788) |        | 0.748 (0.708,0.791)  |        | 0.761 (0.72,0.805)   |        | 0.751 (0.71,0.795)   |        | 0.753 (0.711,0.797)  |        |
|                                                                                                                            |                                           | 6                       | 8525        | 0.722 (0.682,0.764) |        | 0.722 (0.682,0.765)  |        | 0.737 (0.696,0.78)   |        | 0.722 (0.682,0.766)  |        | 0.722 (0.681,0.766)  |        |
|                                                                                                                            |                                           | 7                       | 8283        | 0.688 (0.649,0.73)  |        | 0.69 (0.65,0.731)    |        | 0.705 (0.665,0.748)  |        | 0.699 (0.658,0.742)  |        | 0.71 (0.668,0.754)   |        |
|                                                                                                                            |                                           | 8                       | 8564        | 0.706 (0.665,0.75)  |        | 0.709 (0.668,0.753)  |        | 0.732 (0.689,0.777)  |        | 0.731 (0.687,0.778)  |        | 0.737 (0.693,0.784)  |        |
|                                                                                                                            |                                           | 9                       | 8629        | 0.639 (0.603,0.677) |        | 0.64 (0.604,0.678)   |        | 0.67 (0.632,0.71)    |        | 0.665 (0.625,0.707)  |        | 0.678 (0.638,0.721)  |        |
|                                                                                                                            |                                           | 10                      | 6877        | 0.557 (0.528,0.587) |        | 0.557 (0.528,0.587)  |        | 0.61 (0.578,0.644)   |        | 0.61 (0.575,0.647)   |        | 0.633 (0.596,0.671)  |        |
|                                                                                                                            | <b>EDI (deciles) in other areas</b>       | 1                       | 16751       | 0.57 (0.492,0.66)   |        | 0.569 (0.491,0.66)   |        | 0.572 (0.494,0.663)  |        | 0.599 (0.516,0.694)  |        | 0.598 (0.515,0.694)  |        |
|                                                                                                                            |                                           | 2                       | 17342       | 0.616 (0.557,0.682) |        | 0.615 (0.555,0.681)  |        | 0.619 (0.559,0.686)  |        | 0.634 (0.572,0.702)  |        | 0.635 (0.573,0.704)  |        |
|                                                                                                                            |                                           | 3                       | 12299       | 0.593 (0.546,0.644) |        | 0.592 (0.545,0.643)  |        | 0.597 (0.549,0.648)  |        | 0.62 (0.571,0.674)   |        | 0.623 (0.573,0.678)  |        |
|                                                                                                                            |                                           | 4                       | 10802       | 0.596 (0.553,0.642) |        | 0.595 (0.552,0.641)  |        | 0.602 (0.558,0.649)  |        | 0.613 (0.568,0.661)  |        | 0.614 (0.569,0.663)  |        |
|                                                                                                                            |                                           | 5                       | 11523       | 0.57 (0.528,0.616)  |        | 0.568 (0.526,0.614)  |        | 0.574 (0.531,0.62)   |        | 0.587 (0.543,0.635)  |        | 0.593 (0.548,0.641)  |        |
|                                                                                                                            |                                           | 6                       | 10898       | 0.613 (0.575,0.654) |        | 0.612 (0.574,0.652)  |        | 0.621 (0.582,0.662)  |        | 0.624 (0.585,0.666)  |        | 0.633 (0.593,0.676)  |        |
|                                                                                                                            |                                           | 7                       | 10252       | 0.577 (0.54,0.616)  |        | 0.574 (0.538,0.613)  |        | 0.587 (0.55,0.627)   |        | 0.592 (0.554,0.633)  |        | 0.597 (0.558,0.638)  |        |
|                                                                                                                            |                                           | 8                       | 9432        | 0.53 (0.496,0.566)  |        | 0.528 (0.494,0.564)  |        | 0.543 (0.508,0.581)  |        | 0.55 (0.514,0.588)   |        | 0.555 (0.519,0.594)  |        |
|                                                                                                                            |                                           | 9                       | 11333       | 0.491 (0.459,0.525) |        | 0.49 (0.458,0.524)   |        | 0.507 (0.474,0.543)  |        | 0.505 (0.471,0.541)  |        | 0.511 (0.477,0.548)  |        |
|                                                                                                                            |                                           | 10                      | 15976       | 0.452 (0.419,0.487) |        | 0.45 (0.418,0.485)   |        | 0.476 (0.442,0.513)  |        | 0.479 (0.443,0.517)  |        | 0.486 (0.449,0.525)  |        |
| <b>Age</b>                                                                                                                 |                                           | 40-45 y.o. <sup>1</sup> | 92964       |                     |        | 1                    |        | 1                    |        | 1                    |        | 1                    |        |
|                                                                                                                            |                                           | 45-50 y.o.              | 94291       |                     |        | 1.275 (1.247; 1.305) |        | 1.27 (1.242; 1.299)  |        | 1.271 (1.242; 1.3)   |        | 1.258 (1.229; 1.286) |        |
| <b>CMU-C</b>                                                                                                               |                                           | No <sup>1</sup>         | 172456      |                     |        |                      |        | 1                    |        | 1                    |        | 1                    |        |
|                                                                                                                            |                                           | Yes                     | 14799       |                     |        |                      |        | 0.614 (0.584; 0.645) |        | 0.613 (0.583; 0.645) |        | 0.597 (0.567; 0.627) |        |
| <b>GP PLA (deciles)</b>                                                                                                    |                                           | 1 <sup>1</sup>          | 4959        |                     |        |                      |        |                      |        | 1                    |        | 1                    |        |
|                                                                                                                            |                                           | 2                       | 6486        |                     |        |                      |        |                      |        | 1.091 (0.99; 1.204)  |        | 1.078 (0.978; 1.19)  |        |
|                                                                                                                            |                                           | 3                       | 7123        |                     |        |                      |        |                      |        | 1.064 (0.967; 1.172) |        | 1.067 (0.969; 1.175) |        |
|                                                                                                                            |                                           | 4                       | 10062       |                     |        |                      |        |                      |        | 1.057 (0.966; 1.157) |        | 1.044 (0.954; 1.144) |        |
|                                                                                                                            |                                           | 5                       | 14074       |                     |        |                      |        |                      |        | 1.159 (1.063; 1.264) |        | 1.145 (1.05; 1.249)  |        |
|                                                                                                                            |                                           | 6                       | 17792       |                     |        |                      |        |                      |        | 1.173 (1.078; 1.276) |        | 1.158 (1.064; 1.261) |        |
|                                                                                                                            |                                           | 7                       | 27034       |                     |        |                      |        |                      |        | 1.217 (1.122; 1.321) |        | 1.201 (1.107; 1.305) |        |
|                                                                                                                            |                                           | 8                       | 33101       |                     |        |                      |        |                      |        | 1.262 (1.165; 1.369) |        | 1.247 (1.151; 1.354) |        |
| <b>Referring physician</b>                                                                                                 |                                           | No <sup>1</sup>         | 13378       |                     |        |                      |        |                      |        |                      |        | 1                    |        |
|                                                                                                                            |                                           | Yes                     | 173877      |                     |        |                      |        |                      |        |                      |        | 6.849 (6.275; 7.493) |        |

<sup>1</sup> Reference category

1  
2  
3  
4  
5  
6  
7  
8  
9  
10  
11  
12  
13  
14  
15  
16  
17  
18  
19  
20  
21  
22  
23  
24  
25  
26  
27  
28  
29  
30  
31  
32  
33  
34  
35  
36  
37  
38  
39  
40  
41  
42  
43  
44  
45  
46

| Mammography uptake multivariable logistic regression models (n= 154895): in > 74 y.o. women (Mammography uptake = 5.65%) |                                           |                         |             |                     |                      |                     |                      |                     |                      |                     |                      |                     |        |
|--------------------------------------------------------------------------------------------------------------------------|-------------------------------------------|-------------------------|-------------|---------------------|----------------------|---------------------|----------------------|---------------------|----------------------|---------------------|----------------------|---------------------|--------|
|                                                                                                                          |                                           |                         | N           | Model 1             | LogLik               | Model 2             | LogLik               | Model 3             | LogLik               | Model 4             | LogLik               | Model 5             | LogLik |
|                                                                                                                          |                                           |                         | Tot= 154895 | OR (95%CI)          | -33537               | OR (95%CI)          | -30948               | OR (95%CI)          | -30936               | OR (95%CI)          | -30890               | OR (95%CI)          | -30674 |
| <b>Combined EDI and large urban/other</b>                                                                                | <b>EDI (deciles) in large urban areas</b> | 1 <sup>2</sup>          | 939         | 1                   |                      | 1                   |                      | 1                   |                      | 1                   |                      | 1                   |        |
|                                                                                                                          |                                           | 2                       | 2115        | 1.022 (0.904,1.154) |                      | 1.026 (0.906,1.162) |                      | 0.983 (0.95,1.018)  |                      | 0.998 (0.88,1.131)  |                      | 0.994 (0.877,1.127) |        |
|                                                                                                                          |                                           | 3                       | 3983        | 0.968 (0.849,1.104) |                      | 1.009 (0.883,1.154) |                      | 0.971 (0.934,1.009) |                      | 0.978 (0.855,1.119) |                      | 0.973 (0.85,1.114)  |        |
|                                                                                                                          |                                           | 4                       | 6092        | 0.921 (0.803,1.055) |                      | 0.921 (0.802,1.058) |                      | 0.939 (0.902,0.976) |                      | 0.883 (0.769,1.015) |                      | 0.88 (0.765,1.011)  |        |
|                                                                                                                          |                                           | 5                       | 5757        | 0.893 (0.784,1.017) |                      | 0.956 (0.838,1.092) |                      | 0.897 (0.863,0.933) |                      | 0.898 (0.785,1.027) |                      | 0.892 (0.779,1.02)  |        |
|                                                                                                                          |                                           | 6                       | 9950        | 0.891 (0.784,1.013) |                      | 0.945 (0.829,1.077) |                      | 0.936 (0.901,0.973) |                      | 0.878 (0.769,1.002) |                      | 0.873 (0.765,0.997) |        |
|                                                                                                                          |                                           | 7                       | 10334       | 0.896 (0.789,1.019) |                      | 0.973 (0.854,1.108) |                      | 0.858 (0.825,0.892) |                      | 0.88 (0.77,1.006)   |                      | 0.879 (0.769,1.005) |        |
|                                                                                                                          |                                           | 8                       | 10647       | 0.99 (0.873,1.123)  |                      | 1.088 (0.957,1.238) |                      | 0.885 (0.85,0.922)  |                      | 0.987 (0.865,1.127) |                      | 0.982 (0.86,1.121)  |        |
|                                                                                                                          |                                           | 9                       | 10974       | 0.926 (0.821,1.044) |                      | 1.029 (0.911,1.163) |                      | 0.855 (0.823,0.888) |                      | 0.89 (0.782,1.012)  |                      | 0.886 (0.779,1.008) |        |
|                                                                                                                          |                                           | 10                      | 9307        | 0.899 (0.802,1.007) |                      | 0.977 (0.87,1.097)  |                      | 0.763 (0.737,0.79)  |                      | 0.837 (0.74,0.948)  |                      | 0.835 (0.738,0.946) |        |
|                                                                                                                          | <b>EDI (deciles) in other</b>             | 1                       | 7482        | 0.77 (0.572,1.039)  |                      | 0.765 (0.565,1.035) |                      | 0.784 (0.719,0.855) |                      | 0.793 (0.584,1.075) |                      | 0.786 (0.579,1.066) |        |
|                                                                                                                          |                                           | 2                       | 8759        | 0.78 (0.633,0.962)  |                      | 0.767 (0.62,0.948)  |                      | 0.845 (0.795,0.897) |                      | 0.791 (0.64,0.979)  |                      | 0.782 (0.632,0.968) |        |
|                                                                                                                          |                                           | 3                       | 6862        | 0.701 (0.592,0.831) |                      | 0.708 (0.596,0.841) |                      | 0.817 (0.778,0.858) |                      | 0.742 (0.623,0.882) |                      | 0.733 (0.616,0.872) |        |
|                                                                                                                          |                                           | 4                       | 6193        | 0.645 (0.555,0.75)  |                      | 0.671 (0.576,0.782) |                      | 0.833 (0.797,0.871) |                      | 0.662 (0.568,0.772) |                      | 0.659 (0.565,0.769) |        |
|                                                                                                                          |                                           | 5                       | 7566        | 0.539 (0.458,0.634) |                      | 0.552 (0.468,0.65)  |                      | 0.78 (0.746,0.817)  |                      | 0.55 (0.466,0.649)  |                      | 0.547 (0.463,0.646) |        |
|                                                                                                                          |                                           | 6                       | 8023        | 0.696 (0.612,0.791) |                      | 0.726 (0.637,0.827) |                      | 0.838 (0.805,0.871) |                      | 0.692 (0.607,0.79)  |                      | 0.686 (0.601,0.783) |        |
|                                                                                                                          |                                           | 7                       | 8076        | 0.65 (0.571,0.739)  |                      | 0.696 (0.61,0.794)  |                      | 0.824 (0.792,0.857) |                      | 0.657 (0.575,0.751) |                      | 0.65 (0.569,0.743)  |        |
|                                                                                                                          |                                           | 8                       | 7774        | 0.728 (0.642,0.825) |                      | 0.774 (0.681,0.878) |                      | 0.833 (0.802,0.866) |                      | 0.727 (0.638,0.828) |                      | 0.717 (0.629,0.816) |        |
|                                                                                                                          |                                           | 9                       | 10269       | 0.706 (0.623,0.8)   |                      | 0.776 (0.683,0.881) |                      | 0.762 (0.733,0.792) |                      | 0.728 (0.64,0.829)  |                      | 0.72 (0.632,0.82)   |        |
|                                                                                                                          |                                           | 10                      | 13793       | 0.693 (0.608,0.79)  |                      | 0.757 (0.663,0.864) |                      | 0.718 (0.688,0.75)  |                      | 0.675 (0.588,0.775) |                      | 0.666 (0.58,0.765)  |        |
|                                                                                                                          | <b>Age</b>                                | 75-80 y.o. <sup>2</sup> | 50815       |                     |                      | 1                   |                      | 1                   |                      | 1                   |                      | 1                   |        |
| 80-85 y.o.                                                                                                               |                                           | 48148                   |             |                     | 0.387 (0.368; 0.407) |                     | 0.387 (0.368; 0.407) |                     | 0.386 (0.367; 0.406) |                     | 0.385 (0.366; 0.405) |                     |        |
| 85-90 y.o.                                                                                                               |                                           | 34698                   |             |                     | 0.152 (0.14; 0.165)  |                     | 0.152 (0.14; 0.165)  |                     | 0.151 (0.139; 0.164) |                     | 0.151 (0.139; 0.164) |                     |        |
| 90-95 y.o.                                                                                                               |                                           | 16602                   |             |                     | 0.067 (0.057; 0.079) |                     | 0.067 (0.057; 0.079) |                     | 0.067 (0.056; 0.079) |                     | 0.067 (0.056; 0.079) |                     |        |
| 95-100 y.o.                                                                                                              |                                           | 4632                    |             |                     | 0.024 (0.013; 0.038) |                     | 0.024 (0.013; 0.038) |                     | 0.023 (0.013; 0.038) |                     | 0.025 (0.014; 0.04)  |                     |        |
| <b>CMU-C</b>                                                                                                             | No <sup>2</sup>                           | 153807                  |             |                     |                      |                     | 1                    |                     | 1                    |                     | 1                    |                     |        |
|                                                                                                                          | Yes                                       | 1088                    |             |                     |                      |                     | 0.443 (0.298; 0.63)  |                     | 0.443 (0.298; 0.63)  |                     | 0.439 (0.295; 0.625) |                     |        |
| <b>GP PLA (deciles)</b>                                                                                                  | 1 <sup>2</sup>                            | 4675                    |             |                     |                      |                     |                      |                     | 1                    |                     | 1                    |                     |        |
|                                                                                                                          | 2                                         | 5726                    |             |                     |                      |                     |                      |                     | 1.14 (0.94; 1.386)   |                     | 1.138 (0.938; 1.383) |                     |        |
|                                                                                                                          | 3                                         | 5537                    |             |                     |                      |                     |                      |                     | 1.037 (0.851; 1.265) |                     | 1.035 (0.85; 1.263)  |                     |        |
|                                                                                                                          | 4                                         | 7717                    |             |                     |                      |                     |                      |                     | 1.091 (0.909; 1.314) |                     | 1.085 (0.904; 1.306) |                     |        |
|                                                                                                                          | 5                                         | 9569                    |             |                     |                      |                     |                      |                     | 1.171 (0.983; 1.399) |                     | 1.17 (0.983; 1.399)  |                     |        |
|                                                                                                                          | 6                                         | 11747                   |             |                     |                      |                     |                      |                     | 1.25 (1.056; 1.486)  |                     | 1.25 (1.055; 1.486)  |                     |        |
|                                                                                                                          | 7                                         | 18800                   |             |                     |                      |                     |                      |                     | 1.316 (1.12; 1.554)  |                     | 1.312 (1.117; 1.549) |                     |        |
|                                                                                                                          | 8                                         | 25658                   |             |                     |                      |                     |                      |                     | 1.441 (1.231; 1.694) |                     | 1.44 (1.231; 1.695)  |                     |        |
|                                                                                                                          | 9                                         | 30207                   |             |                     |                      |                     |                      |                     | 1.398 (1.195; 1.644) |                     | 1.403 (1.199; 1.65)  |                     |        |
|                                                                                                                          | 10                                        | 35259                   |             |                     |                      |                     |                      |                     | 1.546 (1.322; 1.818) |                     | 1.555 (1.329; 1.829) |                     |        |
| <b>Referring physician</b>                                                                                               | No <sup>2</sup>                           | 5992                    |             |                     |                      |                     |                      |                     |                      |                     | 1                    |                     |        |
|                                                                                                                          | Yes                                       | 148903                  |             |                     |                      |                     |                      |                     |                      |                     | 8.938 (6.66; 12.37)  |                     |        |

<sup>2</sup> Reference category

**Pap smear uptake multivariable logistic regression models (n= 63068) in 20-25 y.o. women (Pap smear uptake = 20.58 %)**

|                                           |                                           | N              | Model 1    | LogLik               | Model 2              | LogLik               | Model 3              | LogLik               | Model 4    | LogLik | Model 5    | LogLik |
|-------------------------------------------|-------------------------------------------|----------------|------------|----------------------|----------------------|----------------------|----------------------|----------------------|------------|--------|------------|--------|
|                                           |                                           | Tot= 63068     | OR (95%CI) | -31988               | OR (95%CI)           | -31676               | OR (95%CI)           | -31675               | OR (95%CI) | -31670 | OR (95%CI) | -30989 |
| <b>Combined EDI and large urban/other</b> | <b>EDI (deciles) in large urban areas</b> | 1 <sup>3</sup> | 272        | 1                    | 1                    | 1                    | 1                    | 1                    | 1          | 1      | 1          | 1      |
|                                           |                                           | 2              | 600        | 0.958 (0.864; 1.062) | 0.951 (0.858; 1.056) | 0.952 (0.859; 1.057) | 0.956 (0.861; 1.062) | 0.941 (0.846; 1.046) |            |        |            |        |
|                                           |                                           | 3              | 1047       | 0.992 (0.888; 1.108) | 0.985 (0.881; 1.101) | 0.987 (0.882; 1.103) | 0.987 (0.882; 1.105) | 0.975 (0.87; 1.093)  |            |        |            |        |
|                                           |                                           | 4              | 1451       | 1.024 (0.914; 1.146) | 1.021 (0.911; 1.143) | 1.022 (0.913; 1.145) | 1.029 (0.918; 1.154) | 1.021 (0.91; 1.146)  |            |        |            |        |
|                                           |                                           | 5              | 1412       | 0.915 (0.823; 1.017) | 0.905 (0.813; 1.007) | 0.907 (0.815; 1.009) | 0.922 (0.827; 1.028) | 0.921 (0.825; 1.028) |            |        |            |        |
|                                           |                                           | 6              | 2197       | 0.896 (0.803; 0.999) | 0.889 (0.797; 0.992) | 0.892 (0.799; 0.995) | 0.903 (0.808; 1.009) | 0.895 (0.8; 1.002)   |            |        |            |        |
|                                           |                                           | 7              | 2336       | 0.92 (0.828; 1.023)  | 0.901 (0.81; 1.002)  | 0.903 (0.812; 1.005) | 0.923 (0.827; 1.03)  | 0.94 (0.841; 1.05)   |            |        |            |        |
|                                           |                                           | 8              | 2376       | 0.917 (0.824; 1.02)  | 0.895 (0.804; 0.997) | 0.898 (0.806; 1)     | 0.925 (0.828; 1.033) | 0.938 (0.838; 1.049) |            |        |            |        |
|                                           |                                           | 9              | 2575       | 0.824 (0.746; 0.909) | 0.801 (0.726; 0.885) | 0.804 (0.728; 0.889) | 0.834 (0.751; 0.927) | 0.858 (0.771; 0.954) |            |        |            |        |
|                                           |                                           | 10             | 2484       | 0.735 (0.67; 0.808)  | 0.733 (0.667; 0.805) | 0.739 (0.672; 0.812) | 0.772 (0.697; 0.856) | 0.802 (0.722; 0.89)  |            |        |            |        |
|                                           | <b>EDI (deciles) in other areas</b>       | 1              | 3700       | 0.696 (0.498; 0.953) | 0.701 (0.501; 0.961) | 0.701 (0.501; 0.962) | 0.701 (0.5; 0.962)   | 0.729 (0.519; 1.005) |            |        |            |        |
|                                           |                                           | 2              | 4599       | 0.895 (0.723; 1.101) | 0.903 (0.729; 1.112) | 0.903 (0.729; 1.113) | 0.904 (0.729; 1.114) | 0.902 (0.726; 1.114) |            |        |            |        |
|                                           |                                           | 3              | 3387       | 0.938 (0.794; 1.105) | 0.956 (0.809; 1.127) | 0.957 (0.809; 1.128) | 0.964 (0.814; 1.138) | 0.963 (0.812; 1.139) |            |        |            |        |
|                                           |                                           | 4              | 3098       | 0.779 (0.669; 0.906) | 0.78 (0.669; 0.908)  | 0.781 (0.67; 0.909)  | 0.788 (0.675; 0.917) | 0.784 (0.671; 0.914) |            |        |            |        |
|                                           |                                           | 5              | 4188       | 0.846 (0.727; 0.983) | 0.852 (0.731; 0.99)  | 0.853 (0.732; 0.992) | 0.859 (0.736; 0.999) | 0.849 (0.727; 0.989) |            |        |            |        |
|                                           |                                           | 6              | 3814       | 0.839 (0.737; 0.955) | 0.849 (0.745; 0.966) | 0.85 (0.746; 0.967)  | 0.858 (0.752; 0.977) | 0.849 (0.744; 0.969) |            |        |            |        |
|                                           |                                           | 7              | 4205       | 0.835 (0.735; 0.948) | 0.838 (0.737; 0.951) | 0.84 (0.739; 0.954)  | 0.855 (0.751; 0.972) | 0.837 (0.735; 0.954) |            |        |            |        |
|                                           |                                           | 8              | 4074       | 0.77 (0.677; 0.875)  | 0.776 (0.682; 0.882) | 0.778 (0.683; 0.885) | 0.789 (0.692; 0.899) | 0.78 (0.683; 0.89)   |            |        |            |        |
|                                           |                                           | 9              | 6237       | 0.797 (0.704; 0.902) | 0.809 (0.713; 0.916) | 0.812 (0.716; 0.919) | 0.823 (0.725; 0.934) | 0.826 (0.726; 0.939) |            |        |            |        |
|                                           |                                           | 10             | 9016       | 0.655 (0.574; 0.746) | 0.661 (0.579; 0.754) | 0.665 (0.582; 0.758) | 0.688 (0.6; 0.787)   | 0.701 (0.61; 0.803)  |            |        |            |        |
| <b>Age</b>                                | 20-21y.o <sup>3</sup>                     | 9827           |            | 1                    | 1                    | 1                    | 1                    | 1                    |            |        |            |        |
|                                           | 21-22 y.o.                                | 11080          |            | 1.234 (1.144; 1.33)  | 1.233 (1.144; 1.33)  | 1.234 (1.144; 1.33)  | 1.205 (1.117; 1.3)   |                      |            |        |            |        |
|                                           | 22-23 y.o.                                | 12631          |            | 1.516 (1.411; 1.628) | 1.514 (1.41; 1.626)  | 1.516 (1.412; 1.628) | 1.435 (1.335; 1.543) |                      |            |        |            |        |
|                                           | 23-24 y.o.                                | 14064          |            | 1.709 (1.595; 1.832) | 1.707 (1.593; 1.83)  | 1.711 (1.597; 1.834) | 1.576 (1.47; 1.691)  |                      |            |        |            |        |
|                                           | 24-25 y.o.                                | 15466          |            | 2.102 (1.966; 2.249) | 2.099 (1.963; 2.246) | 2.104 (1.967; 2.25)  | 1.912 (1.787; 2.047) |                      |            |        |            |        |
| <b>CMU-C</b>                              | No <sup>3</sup>                           | 54768          |            |                      | 1                    | 1                    | 1                    |                      |            |        |            |        |
|                                           | Yes                                       | 8300           |            |                      | 0.968 (0.911; 1.028) | 0.969 (0.912; 1.029) | 0.899 (0.845; 0.955) |                      |            |        |            |        |
| <b>GP PLA (deciles)</b>                   | 1 <sup>3</sup>                            | 1167           |            |                      |                      | 1                    | 1                    |                      |            |        |            |        |
|                                           | 2                                         | 1569           |            |                      |                      | 1.057 (0.873; 1.281) | 1.033 (0.851; 1.254) |                      |            |        |            |        |
|                                           | 3                                         | 1626           |            |                      |                      | 1.09 (0.903; 1.318)  | 1.069 (0.884; 1.295) |                      |            |        |            |        |
|                                           | 4                                         | 2498           |            |                      |                      | 1.096 (0.92; 1.307)  | 1.075 (0.902; 1.285) |                      |            |        |            |        |
|                                           | 5                                         | 3594           |            |                      |                      | 1.07 (0.906; 1.268)  | 1.055 (0.891; 1.252) |                      |            |        |            |        |
|                                           | 6                                         | 4813           |            |                      |                      | 1.026 (0.872; 1.21)  | 1.018 (0.864; 1.203) |                      |            |        |            |        |
|                                           | 7                                         | 7959           |            |                      |                      | 1.055 (0.902; 1.238) | 1.039 (0.887; 1.222) |                      |            |        |            |        |
|                                           | 8                                         | 10982          |            |                      |                      | 1.074 (0.92; 1.257)  | 1.054 (0.902; 1.236) |                      |            |        |            |        |
|                                           | 9                                         | 12533          |            |                      |                      | 1.021 (0.875; 1.196) | 1.011 (0.865; 1.186) |                      |            |        |            |        |
|                                           | 10                                        | 16327          |            |                      |                      | 0.986 (0.845; 1.155) | 1.004 (0.859; 1.178) |                      |            |        |            |        |
| <b>Referring physician</b>                | No <sup>3</sup>                           | 13716          |            |                      |                      |                      | 1                    |                      |            |        |            |        |
|                                           | Yes                                       | 49352          |            |                      |                      |                      | 2.859 (2.69; 3.042)  |                      |            |        |            |        |

<sup>3</sup> Reference category

## Pap smear uptake multivariable logistic regression models (n= 252156) in &gt; 65 y.o. women (Pap smear uptake = 5.69%)

|                                                 |                                           |                | N                    | Model 1              | LogLik               | Model 2              | LogLik               | Model 3              | LogLik               | Model 4              | LogLik | Model 5               | LogLik |
|-------------------------------------------------|-------------------------------------------|----------------|----------------------|----------------------|----------------------|----------------------|----------------------|----------------------|----------------------|----------------------|--------|-----------------------|--------|
|                                                 |                                           |                | Tot= 252156          | OR (95%CI)           | -54676               | OR (95%CI)           | -48204               | OR (95%CI)           | -48196               | OR (95%CI)           | -48125 | OR (95%CI)            | -47675 |
| <b>Combined EDI and large urban/other areas</b> | <b>EDI (deciles) in large urban areas</b> | 1 <sup>4</sup> | 1669                 | 1                    |                      | 1                    |                      | 1                    |                      | 1                    |        | 1                     |        |
|                                                 |                                           | 2              | 3720                 | 0.875 (0.805,0.951)  |                      | 0.904 (0.83,0.985)   |                      | 0.905 (0.83,0.985)   |                      | 0.874 (0.801,0.953)  |        | 0.865 (0.793,0.944)   |        |
|                                                 |                                           | 3              | 6672                 | 0.822 (0.75,0.901)   |                      | 0.903 (0.821,0.992)  |                      | 0.903 (0.821,0.992)  |                      | 0.874 (0.795,0.961)  |        | 0.866 (0.787,0.953)   |        |
|                                                 |                                           | 4              | 9800                 | 0.786 (0.714,0.865)  |                      | 0.859 (0.779,0.948)  |                      | 0.86 (0.78,0.949)    |                      | 0.825 (0.748,0.911)  |        | 0.817 (0.74,0.902)    |        |
|                                                 |                                           | 5              | 9294                 | 0.743 (0.677,0.815)  |                      | 0.858 (0.78,0.944)   |                      | 0.859 (0.782,0.945)  |                      | 0.809 (0.735,0.891)  |        | 0.805 (0.731,0.887)   |        |
|                                                 |                                           | 6              | 15807                | 0.641 (0.584,0.705)  |                      | 0.738 (0.669,0.813)  |                      | 0.738 (0.67,0.813)   |                      | 0.687 (0.622,0.758)  |        | 0.679 (0.615,0.749)   |        |
|                                                 |                                           | 7              | 16336                | 0.69 (0.628,0.757)   |                      | 0.833 (0.757,0.917)  |                      | 0.834 (0.757,0.918)  |                      | 0.763 (0.691,0.842)  |        | 0.764 (0.692,0.843)   |        |
|                                                 |                                           | 8              | 16801                | 0.796 (0.727,0.872)  |                      | 0.982 (0.894,1.079)  |                      | 0.984 (0.895,1.081)  |                      | 0.898 (0.815,0.99)   |        | 0.895 (0.812,0.987)   |        |
|                                                 |                                           | 9              | 17022                | 0.685 (0.628,0.748)  |                      | 0.855 (0.781,0.936)  |                      | 0.858 (0.784,0.94)   |                      | 0.748 (0.68,0.823)   |        | 0.745 (0.677,0.82)    |        |
|                                                 |                                           | 10             | 14130                | 0.647 (0.596,0.702)  |                      | 0.789 (0.725,0.858)  |                      | 0.795 (0.73,0.865)   |                      | 0.68 (0.621,0.745)   |        | 0.678 (0.619,0.743)   |        |
|                                                 | <b>EDI (deciles) in other areas</b>       | 1              | 14042                | 0.641 (0.517,0.795)  |                      | 0.669 (0.537,0.834)  |                      | 0.668 (0.536,0.833)  |                      | 0.693 (0.555,0.865)  |        | 0.687 (0.55,0.858)    |        |
|                                                 |                                           | 2              | 15838                | 0.571 (0.488,0.669)  |                      | 0.6 (0.511,0.705)    |                      | 0.6 (0.511,0.704)    |                      | 0.616 (0.524,0.724)  |        | 0.607 (0.516,0.714)   |        |
|                                                 |                                           | 3              | 11781                | 0.556 (0.49,0.63)    |                      | 0.616 (0.542,0.7)    |                      | 0.616 (0.542,0.7)    |                      | 0.635 (0.558,0.723)  |        | 0.628 (0.551,0.715)   |        |
|                                                 |                                           | 4              | 10633                | 0.522 (0.467,0.583)  |                      | 0.61 (0.545,0.683)   |                      | 0.61 (0.545,0.683)   |                      | 0.603 (0.538,0.676)  |        | 0.596 (0.532,0.668)   |        |
|                                                 |                                           | 5              | 12461                | 0.456 (0.405,0.513)  |                      | 0.524 (0.464,0.591)  |                      | 0.524 (0.464,0.591)  |                      | 0.526 (0.466,0.594)  |        | 0.519 (0.459,0.586)   |        |
|                                                 |                                           | 6              | 13160                | 0.5 (0.454,0.55)     |                      | 0.598 (0.542,0.659)  |                      | 0.598 (0.542,0.659)  |                      | 0.577 (0.522,0.637)  |        | 0.569 (0.515,0.629)   |        |
|                                                 |                                           | 7              | 12897                | 0.497 (0.452,0.547)  |                      | 0.599 (0.544,0.66)   |                      | 0.6 (0.544,0.661)    |                      | 0.572 (0.518,0.631)  |        | 0.564 (0.511,0.623)   |        |
|                                                 |                                           | 8              | 12297                | 0.508 (0.463,0.558)  |                      | 0.612 (0.556,0.673)  |                      | 0.612 (0.556,0.674)  |                      | 0.579 (0.525,0.639)  |        | 0.57 (0.516,0.629)    |        |
|                                                 |                                           | 9              | 15991                | 0.436 (0.396,0.481)  |                      | 0.535 (0.484,0.591)  |                      | 0.535 (0.485,0.591)  |                      | 0.503 (0.454,0.556)  |        | 0.495 (0.447,0.548)   |        |
|                                                 |                                           | 10             | 21805                | 0.461 (0.416,0.51)   |                      | 0.587 (0.529,0.651)  |                      | 0.589 (0.53,0.653)   |                      | 0.528 (0.474,0.588)  |        | 0.519 (0.466,0.578)   |        |
| <b>Age</b>                                      | 65-70 y.o. <sup>4</sup>                   | 48684          |                      | 1                    |                      | 1                    |                      | 1                    |                      | 1                    |        | 1                     |        |
|                                                 | 70-75 y.o.                                | 48577          |                      | 0.583 (0.56; 0.607)  |                      | 0.582 (0.559; 0.606) |                      | 0.581 (0.558; 0.605) |                      | 0.578 (0.555; 0.601) |        |                       |        |
|                                                 | 75-80 y.o.                                | 50815          |                      | 0.252 (0.24; 0.266)  |                      | 0.252 (0.239; 0.265) |                      | 0.251 (0.238; 0.264) |                      | 0.247 (0.234; 0.26)  |        |                       |        |
|                                                 | 80-85 y.o.                                | 48148          |                      | 0.094 (0.087; 0.102) |                      | 0.094 (0.087; 0.101) |                      | 0.093 (0.086; 0.101) |                      | 0.092 (0.085; 0.099) |        |                       |        |
|                                                 | 85-90 y.o.                                | 34698          |                      | 0.03 (0.026; 0.035)  |                      | 0.03 (0.026; 0.035)  |                      | 0.03 (0.026; 0.035)  |                      | 0.029 (0.025; 0.034) |        |                       |        |
|                                                 | 90-95 y.o.                                | 16602          |                      | 0.013 (0.01; 0.018)  |                      | 0.013 (0.01; 0.018)  |                      | 0.013 (0.009; 0.018) |                      | 0.013 (0.009; 0.018) |        |                       |        |
| 95-100 y.o.                                     | 4632                                      |                | 0.005 (0.002; 0.012) |                      | 0.005 (0.002; 0.012) |                      | 0.005 (0.002; 0.012) |                      | 0.005 (0.002; 0.012) |                      |        |                       |        |
| <b>CMU-C</b>                                    | No <sup>4</sup>                           | 249945         |                      |                      |                      | 1                    |                      | 1                    |                      | 1                    |        | 1                     |        |
|                                                 | Yes                                       | 2211           |                      |                      |                      | 0.68 (0.558; 0.821)  |                      | 0.676 (0.555; 0.816) |                      | 0.67 (0.55; 0.809)   |        |                       |        |
| <b>GP PLA (deciles)</b>                         | 1 <sup>4</sup>                            | 7805           |                      |                      |                      |                      |                      | 1                    |                      | 1                    |        | 1                     |        |
|                                                 | 2                                         | 9343           |                      |                      |                      |                      |                      | 0.85 (0.731; 0.989)  |                      | 0.842 (0.724; 0.98)  |        |                       |        |
|                                                 | 3                                         | 9254           |                      |                      |                      |                      |                      | 0.885 (0.763; 1.028) |                      | 0.886 (0.763; 1.029) |        |                       |        |
|                                                 | 4                                         | 12955          |                      |                      |                      |                      |                      | 1.004 (0.877; 1.151) |                      | 0.995 (0.869; 1.141) |        |                       |        |
|                                                 | 5                                         | 16421          |                      |                      |                      |                      |                      | 1.054 (0.927; 1.202) |                      | 1.053 (0.926; 1.201) |        |                       |        |
|                                                 | 6                                         | 19914          |                      |                      |                      |                      |                      | 1.088 (0.96; 1.237)  |                      | 1.08 (0.952; 1.227)  |        |                       |        |
|                                                 | 7                                         | 31912          |                      |                      |                      |                      |                      | 1.147 (1.017; 1.296) |                      | 1.14 (1.011; 1.289)  |        |                       |        |
|                                                 | 8                                         | 42273          |                      |                      |                      |                      |                      | 1.223 (1.087; 1.379) |                      | 1.214 (1.08; 1.37)   |        |                       |        |
|                                                 | 9                                         | 47761          |                      |                      |                      |                      |                      | 1.282 (1.14; 1.446)  |                      | 1.282 (1.14; 1.446)  |        |                       |        |
|                                                 | 10                                        | 54518          |                      |                      |                      |                      |                      | 1.319 (1.173; 1.488) |                      | 1.327 (1.179; 1.497) |        |                       |        |
| <b>Referring physician</b>                      | No <sup>4</sup>                           | 10487          |                      |                      |                      |                      |                      |                      |                      |                      |        | 1                     |        |
|                                                 | Yes                                       | 241669         |                      |                      |                      |                      |                      |                      |                      |                      |        | 9.629 (7.764; 12.133) |        |

<sup>4</sup> Reference category

1  
2  
3  
4  
5  
6  
7  
8  
9  
10  
11  
12  
13  
14  
15  
16  
17  
18  
19  
20  
21  
22  
23  
24  
25  
26  
27  
28  
29  
30  
31  
32  
33  
34  
35  
36  
37  
38  
39  
40  
41  
42  
43  
44  
45  
46

For peer review only



STROBE Statement—checklist of items included in the study “Social and territorial inequalities in gynaecological cancers screening uptake in France”

|                              | Item No | Recommendation                                                                                                                                                                                                                                                                                                                                                                                                                                                         |   | Page number |
|------------------------------|---------|------------------------------------------------------------------------------------------------------------------------------------------------------------------------------------------------------------------------------------------------------------------------------------------------------------------------------------------------------------------------------------------------------------------------------------------------------------------------|---|-------------|
| <b>Title and abstract</b>    | 1       | (a) Indicate the study’s design with a commonly used term in the title or the abstract                                                                                                                                                                                                                                                                                                                                                                                 | X | 1           |
|                              |         | (b) Provide in the abstract an informative and balanced summary of what was done and what was found                                                                                                                                                                                                                                                                                                                                                                    | X | 2           |
| <b>Introduction</b>          |         |                                                                                                                                                                                                                                                                                                                                                                                                                                                                        |   |             |
| Background/rationale         | 2       | Explain the scientific background and rationale for the investigation being reported                                                                                                                                                                                                                                                                                                                                                                                   | X | 5           |
| Objectives                   | 3       | State specific objectives, including any prespecified hypotheses                                                                                                                                                                                                                                                                                                                                                                                                       | X | 5           |
| <b>Methods</b>               |         |                                                                                                                                                                                                                                                                                                                                                                                                                                                                        |   |             |
| Study design                 | 4       | Present key elements of study design early in the paper                                                                                                                                                                                                                                                                                                                                                                                                                | X | 6           |
| Setting                      | 5       | Describe the setting, locations, and relevant dates, including periods of recruitment, exposure, follow-up, and data collection                                                                                                                                                                                                                                                                                                                                        | X | 6           |
| Participants                 | 6       | (a) <i>Cohort study</i> —Give the eligibility criteria, and the sources and methods of selection of participants. Describe methods of follow-up<br><i>Case-control study</i> —Give the eligibility criteria, and the sources and methods of case ascertainment and control selection. Give the rationale for the choice of cases and controls<br><i>Cross-sectional study</i> —Give the eligibility criteria, and the sources and methods of selection of participants | X | 6           |
|                              |         | (b) <i>Cohort study</i> —For matched studies, give matching criteria and number of exposed and unexposed<br><i>Case-control study</i> —For matched studies, give matching criteria and the number of controls per case                                                                                                                                                                                                                                                 |   |             |
| Variables                    | 7       | Clearly define all outcomes, exposures, predictors, potential confounders, and effect modifiers. Give diagnostic criteria, if applicable                                                                                                                                                                                                                                                                                                                               | X | 6-8         |
| Data sources/<br>measurement | 8*      | For each variable of interest, give sources of data and details of methods of assessment (measurement). Describe comparability of assessment methods if there is more than one group                                                                                                                                                                                                                                                                                   | X | 6-8         |
| Bias                         | 9       | Describe any efforts to address potential sources of bias                                                                                                                                                                                                                                                                                                                                                                                                              | X | 6-9         |
| Study size                   | 10      | Explain how the study size was arrived at                                                                                                                                                                                                                                                                                                                                                                                                                              | X | 6           |
| Quantitative<br>variables    | 11      | Explain how quantitative variables were handled in the analyses. If applicable, describe which groupings were chosen and why                                                                                                                                                                                                                                                                                                                                           | X | 6-8         |
| Statistical methods          | 12      | (a) Describe all statistical methods, including those used to control for confounding                                                                                                                                                                                                                                                                                                                                                                                  | X | 8-9         |
|                              |         | (b) Describe any methods used to examine subgroups and interactions                                                                                                                                                                                                                                                                                                                                                                                                    | X | 9           |
|                              |         | (c) Explain how missing data were addressed                                                                                                                                                                                                                                                                                                                                                                                                                            | X | 9           |
|                              |         | (d) <i>Cohort study</i> —If applicable, explain how loss to follow-up was addressed<br><i>Case-control study</i> —If applicable, explain how matching of cases and controls was addressed<br><i>Cross-sectional study</i> —If applicable, describe analytical methods taking account of sampling strategy                                                                                                                                                              |   |             |
|                              |         | (e) Describe any sensitivity analyses                                                                                                                                                                                                                                                                                                                                                                                                                                  |   |             |

| <b>Results</b>           |     |                                                                                                                                                                                                              |   |                                      |
|--------------------------|-----|--------------------------------------------------------------------------------------------------------------------------------------------------------------------------------------------------------------|---|--------------------------------------|
| Participants             | 13* | (a) Report numbers of individuals at each stage of study—eg numbers potentially eligible, examined for eligibility, confirmed eligible, included in the study, completing follow-up, and analysed            | X | 7+10                                 |
|                          |     | (b) Give reasons for non-participation at each stage                                                                                                                                                         | X | 6+9                                  |
|                          |     | (c) Consider use of a flow diagram                                                                                                                                                                           | X | 9 (no figure)                        |
| Descriptive data         | 14* | (a) Give characteristics of study participants (eg demographic, clinical, social) and information on exposures and potential confounders                                                                     | X | 9-10 + table 1 + suppl. Tables A     |
|                          |     | (b) Indicate number of participants with missing data for each variable of interest                                                                                                                          | X | 9                                    |
|                          |     | (c) <i>Cohort study</i> —Summarise follow-up time (eg, average and total amount)                                                                                                                             |   |                                      |
| Outcome data             | 15* | <i>Cohort study</i> —Report numbers of outcome events or summary measures over time                                                                                                                          |   |                                      |
|                          |     | <i>Case-control study</i> —Report numbers in each exposure category, or summary measures of exposure                                                                                                         |   |                                      |
|                          |     | <i>Cross-sectional study</i> —Report numbers of outcome events or summary measures                                                                                                                           | X | 10-11 + Table 1                      |
| Main results             | 16  | (a) Give unadjusted estimates and, if applicable, confounder-adjusted estimates and their precision (eg, 95% confidence interval). Make clear which confounders were adjusted for and why they were included | X | 10-11+ Tables 2/3                    |
|                          |     | (b) Report category boundaries when continuous variables were categorized                                                                                                                                    | X | 8-10 + Tables 2/3                    |
|                          |     | (c) If relevant, consider translating estimates of relative risk into absolute risk for a meaningful time period                                                                                             |   |                                      |
| Other analyses           | 17  | Report other analyses done—eg analyses of subgroups and interactions, and sensitivity analyses                                                                                                               | X | 12-13 + Tables 2/3 + Suppl. Tables B |
| <b>Discussion</b>        |     |                                                                                                                                                                                                              |   |                                      |
| Key results              | 18  | Summarise key results with reference to study objectives                                                                                                                                                     | X | 16                                   |
| Limitations              | 19  | Discuss limitations of the study, taking into account sources of potential bias or imprecision. Discuss both direction and magnitude of any potential bias                                                   | X | 16                                   |
| Interpretation           | 20  | Give a cautious overall interpretation of results considering objectives, limitations, multiplicity of analyses, results from similar studies, and other relevant evidence                                   | X | 16-19                                |
| Generalisability         | 21  | Discuss the generalisability (external validity) of the study results                                                                                                                                        | X | 16-19                                |
| <b>Other information</b> |     |                                                                                                                                                                                                              |   |                                      |
| Funding                  | 22  | Give the source of funding and the role of the funders for the present study and, if applicable, for the original study on which the present article is based                                                | X | 21                                   |

\*Give information separately for cases and controls in case-control studies and, if applicable, for exposed and unexposed groups in cohort and cross-sectional studies.

**Note:** An Explanation and Elaboration article discusses each checklist item and gives methodological background and published examples of transparent reporting. The STROBE checklist is best used in conjunction with this article (freely available on the Web sites of PLoS Medicine at <http://www.plosmedicine.org/>, Annals of Internal Medicine at

1  
2  
3  
4  
5  
6  
7  
8  
9  
10  
11  
12  
13  
14  
15  
16  
17  
18  
19  
20  
21  
22  
23  
24  
25  
26  
27  
28  
29  
30  
31  
32  
33  
34  
35  
36  
37  
38  
39  
40  
41  
42  
43  
44  
45  
46  
47  
48  
49  
50  
51  
52  
53  
54  
55  
56  
57  
58  
59  
60

<http://www.annals.org/>, and *Epidemiology* at <http://www.epidem.com/>). Information on the STROBE Initiative is available at [www.strobe-statement.org](http://www.strobe-statement.org).

For peer review only
