# Supplementary material for: Social and territorial inequalities in breast and cervical cancers screening uptake: a cross-sectional study in France
Source: PubMed Central journal article supplement — BMJ Open. 2022 Feb 22;12(2):e055363. doi: 10.1136/bmjopen-2021-055363 (PMC8867371; doi:10.1136/bmjopen-2021-055363), 2022-02-22
Supplement: bmjopen-2021-055363supp001.pdf [file bmjopen-2021-055363supp001.pdf]

## Supplementary material

### *Tables A: Characteristics of women in recommended age groups for gynaecological screening programmes in Midi Pyrénées*

| <b>Characteristics of women between 50 and 74 y.o. (recommended age group for mammography)</b> |                                |                               |                                 |
|------------------------------------------------------------------------------------------------|--------------------------------|-------------------------------|---------------------------------|
| <b>N= 365 947</b>                                                                              |                                |                               |                                 |
|                                                                                                | <b>Toulouse Metropolis</b>     | <b>Other large urban area</b> | <b>Other area</b>               |
|                                                                                                | n= 72919 (19.93%)              | n= 150755 (41.2%)             | n= 142273 (38.88%)              |
|                                                                                                | n (%)                          | n (%)                         | n (%)                           |
| <b>Mammography</b>                                                                             |                                |                               |                                 |
| No Mammographv<br>≥ 1 in the year                                                              | 49978 (68.54)<br>22941 (31.46) | 102663 (68.1)<br>48092 (31.9) | 100713 (70.79)<br>41560 (29.21) |
| <b>Age</b>                                                                                     |                                |                               |                                 |
| Mean (SD)                                                                                      | 60.7 (6.8)                     | 60.9 (6.9)                    | 61.6 (6.9)                      |
| <b>Age (/5years)</b>                                                                           |                                |                               |                                 |
| 50-55 y.o                                                                                      | 19112 (26.21)                  | 37568 (24.92)                 | 31561 (22.18)                   |
| 55-60 y.o                                                                                      | 17097 (23.45)                  | 34985 (23.21)                 | 31044 (21.82)                   |
| 60-65 y.o                                                                                      | 15774 (21.63)                  | 33460 (22.19)                 | 31975 (22.47)                   |
| 65-70 y.o,                                                                                     | 12305 (16.87)                  | 25825 (17.13)                 | 26664 (18.74)                   |
| 70-75 y.o                                                                                      | 8631 (11.84)                   | 18917 (12.55)                 | 21029 (14.78)                   |
| <b>EDI (deciles: 1=best)</b>                                                                   |                                |                               |                                 |
| 1                                                                                              | 7886 (10.81)                   | 20596 (13.66)                 | 2719 (1.91)                     |
| 2                                                                                              | 8615 (11.81)                   | 20315 (13.48)                 | 5896 (4.14)                     |
| 3                                                                                              | 4436 (6.08)                    | 15563 (10.32)                 | 10112 (7.11)                    |
| 4                                                                                              | 3484 (4.78)                    | 14848 (9.85)                  | 13232 (9.3)                     |
| 5                                                                                              | 8183 (11.22)                   | 11820 (7.84)                  | 12730 (8.95)                    |
| 6                                                                                              | 3368 (4.62)                    | 16244 (10.78)                 | 19906 (13.99)                   |
| 7                                                                                              | 6678 (9.16)                    | 12055 (8)                     | 20092 (14.12)                   |
| 8                                                                                              | 6367 (8.73)                    | 10760 (7.14)                  | 20741 (14.58)                   |
| 9                                                                                              | 9519 (13.05)                   | 12192 (8.09)                  | 20679 (14.53)                   |
| 10                                                                                             | 14383 (19.72)                  | 16362 (10.85)                 | 16166 (11.36)                   |
| <b>CMU-C</b>                                                                                   |                                |                               |                                 |
| No CMU-C                                                                                       | 68850 (94.42)                  | 145641 (96.61)                | 137381 (96.56)                  |
| CMU-C                                                                                          | 4069 (5.58)                    | 5114 (3.39)                   | 4892 (3.44)                     |
| <b>GP PLA (deciles: 10= best)</b>                                                              |                                |                               |                                 |
| 1                                                                                              | 363 (0.5)                      | 1744 (1.16)                   | 9320 (6.55)                     |
| 2                                                                                              | 922 (1.26)                     | 4887 (3.24)                   | 7958 (5.59)                     |
| 3                                                                                              | 0 (0)                          | 6290 (4.17)                   | 8165 (5.74)                     |
| 4                                                                                              | 803 (1.1)                      | 9625 (6.38)                   | 10154 (7.14)                    |
| 5                                                                                              | 1409 (1.93)                    | 14229 (9.44)                  | 10767 (7.57)                    |
| 6                                                                                              | 2695 (3.7)                     | 17381 (11.53)                 | 12186 (8.57)                    |
| 7                                                                                              | 9531 (13.07)                   | 25353 (16.82)                 | 15979 (11.23)                   |
| 8                                                                                              | 14772 (20.26)                  | 25147 (16.68)                 | 22412 (15.75)                   |
| 9                                                                                              | 15456 (21.2)                   | 27726 (18.39)                 | 20949 (14.72)                   |
| 10                                                                                             | 26968 (36.98)                  | 18373 (12.19)                 | 24383 (17.14)                   |
| <b>Referring physician</b>                                                                     |                                |                               |                                 |
| No designated referring physician                                                              | 4898 (6.72)                    | 7428 (4.93)                   | 7706 (5.42)                     |
| Official referring physician                                                                   | 68021 (93.28)                  | 143327 (95.07)                | 134567 (94.58)                  |

### Characteristics of women between 25 and 65 y.o. (recommended age group for pap smear)

N= 711 803

|                                   | Toulouse           | Metropolis         | Other large urban areas | Other areas |
|-----------------------------------|--------------------|--------------------|-------------------------|-------------|
|                                   | n= 180030 (25.59%) | n= 302563 (42.61%) | n= 229210 (32.2%)       |             |
|                                   | n (%)              | n (%)              | n (%)                   |             |
| <b>Pap smear</b>                  |                    |                    |                         |             |
| No Pap smear                      | 123038 (68.34)     | 211072 (69.76)     | 172621 (75.31)          |             |
| ≥ 1 in the year                   | 56992 (31.66)      | 91491 (30.24)      | 56589 (24.69)           |             |
| <b>Age</b>                        |                    |                    |                         |             |
| Mean (SD)                         | 42.9 (11.8)        | 45.5 (11.4)        | 47.2 (11.4)             |             |
| <b>Age (/5years)</b>              |                    |                    |                         |             |
|                                   | n= 180030          | n= 302563          | n= 229210               |             |
| 25-30 y.o                         | 30798 (17.11)      | 32111 (10.61)      | 19504 (8.51)            |             |
| 30-35 y.o                         | 28146 (15.63)      | 36721 (12.14)      | 23382 (10.2)            |             |
| 35-40 y.o                         | 23292 (12.94)      | 37351 (12.34)      | 24557 (10.71)           |             |
| 40-45 y.o                         | 21537 (11.96)      | 41983 (13.88)      | 29444 (12.85)           |             |
| 45-50 y.o                         | 21259 (11.81)      | 41829 (13.82)      | 31203 (13.61)           |             |
| 50-55 y.o                         | 19112 (10.62)      | 37568 (12.42)      | 31561 (13.77)           |             |
| 55-60 y.o                         | 17097 (9.5)        | 34985 (11.56)      | 31044 (13.54)           |             |
| 60-65 y.o                         | 15774 (8.76)       | 33460 (11.06)      | 31975 (13.95)           |             |
| 65-70 y.o,                        | 3015 (1.67)        | 6555 (2.17)        | 6540 (2.85)             |             |
| <b>EDI (deciles: 1=best)</b>      |                    |                    |                         |             |
| 1                                 | 14747 (8.19)       | 42750 (14.13)      | 4741 (2.07)             |             |
| 2                                 | 19389 (10.77)      | 41657 (13.77)      | 9906 (4.32)             |             |
| 3                                 | 10922 (6.07)       | 32952 (10.89)      | 16889 (7.37)            |             |
| 4                                 | 8239 (4.58)        | 30690 (10.14)      | 21643 (9.44)            |             |
| 5                                 | 21020 (11.68)      | 23450 (7.75)       | 20561 (8.97)            |             |
| 6                                 | 9173 (5.1)         | 32475 (10.73)      | 31816 (13.88)           |             |
| 7                                 | 17062 (9.48)       | 23586 (7.8)        | 31628 (13.8)            |             |
| 8                                 | 17051 (9.47)       | 20967 (6.93)       | 32394 (14.13)           |             |
| 9                                 | 26337 (14.63)      | 22732 (7.51)       | 33163 (14.47)           |             |
| 10                                | 36090 (20.05)      | 31304 (10.35)      | 26469 (11.55)           |             |
| <b>CMU-C</b>                      |                    |                    |                         |             |
| No CMU-C                          | 161075 (89.47)     | 281794 (93.14)     | 213100 (92.97)          |             |
| CMU-C                             | 18955 (10.53)      | 20769 (6.86)       | 16110 (7.03)            |             |
| <b>GP PLA (deciles: 10= best)</b> |                    |                    |                         |             |
| 1                                 | 831 (0.46)         | 3162 (1.05)        | 14614 (6.38)            |             |
| 2                                 | 2273 (1.26)        | 9407 (3.11)        | 12705 (5.54)            |             |
| 3                                 | 0 (0%)             | 12683 (4.19)       | 13438 (5.86)            |             |
| 4                                 | 1815 (1.01)        | 18903 (6.25)       | 16589 (7.24)            |             |
| 5                                 | 3312 (1.84)        | 28690 (9.48)       | 17813 (7.77)            |             |
| 6                                 | 6666 (3.7)         | 36519 (12.07)      | 20430 (8.91)            |             |
| 7                                 | 20097 (11.16)      | 52821 (17.46)      | 26031 (11.36)           |             |
| 8                                 | 37194 (20.66)      | 51056 (16.87)      | 35210 (15.36)           |             |
| 9                                 | 38815 (21.56)      | 54907 (18.15)      | 33531 (14.63)           |             |
| 10                                | 69027 (38.34)      | 34415 (11.37)      | 38849 (16.95)           |             |
| <b>Referring physician</b>        |                    |                    |                         |             |
| No designated                     | 18754 (10.42)      | 20659 (6.83)       | 18183 (7.93)            |             |
| Designated                        | 161276 (89.58)     | 281904 (93.17)     | 211027 (92.07)          |             |

Tables B: Screening uptake multivariable logistic regression models outside the recommended age groups (sequential adjustment)

| Mammography uptake multivariable logistic regression models (n= 187255): in 40-50 y.o. women (Mammography uptake = 20.77%) |                                           |                | N           | Model 1              | LogLik | Model 2              | LogLik | Model 3              | LogLik | Model 4              | LogLik | Model 5             | LogLik |
|----------------------------------------------------------------------------------------------------------------------------|-------------------------------------------|----------------|-------------|----------------------|--------|----------------------|--------|----------------------|--------|----------------------|--------|---------------------|--------|
|                                                                                                                            |                                           |                | Tot= 187255 | OR (95%CI)           | -94934 | OR (95%CI)           | -94709 | OR (95%CI)           | -94508 | OR (95%CI)           | -94463 | OR (95%CI)          | -92837 |
| <b>Combined EDI and large urban/other areas</b>                                                                            | <b>EDI (deciles) in large urban areas</b> | 1 <sup>1</sup> | 1284        | 1                    |        | 1                    |        | 1                    |        | 1                    |        | 1                   |        |
|                                                                                                                            |                                           | 2              | 2737        | 0.899 (0.857,0.944)  |        | 0.901 (0.859,0.946)  |        | 0.906 (0.863,0.951)  |        | 0.897 (0.855,0.942)  |        | 0.892 (0.849,0.937) |        |
|                                                                                                                            |                                           | 3              | 4550        | 0.845 (0.801,0.892)  |        | 0.847 (0.803,0.894)  |        | 0.855 (0.811,0.902)  |        | 0.843 (0.798,0.89)   |        | 0.839 (0.794,0.886) |        |
|                                                                                                                            |                                           | 4              | 5726        | 0.836 (0.791,0.884)  |        | 0.84 (0.794,0.888)   |        | 0.851 (0.805,0.9)    |        | 0.84 (0.794,0.888)   |        | 0.837 (0.791,0.885) |        |
|                                                                                                                            |                                           | 5              | 5472        | 0.745 (0.705,0.788)  |        | 0.748 (0.708,0.791)  |        | 0.761 (0.72,0.805)   |        | 0.751 (0.71,0.795)   |        | 0.753 (0.711,0.797) |        |
|                                                                                                                            |                                           | 6              | 8525        | 0.722 (0.682,0.764)  |        | 0.722 (0.682,0.765)  |        | 0.737 (0.696,0.78)   |        | 0.722 (0.682,0.766)  |        | 0.722 (0.681,0.766) |        |
|                                                                                                                            |                                           | 7              | 8283        | 0.688 (0.649,0.73)   |        | 0.69 (0.65,0.731)    |        | 0.705 (0.665,0.748)  |        | 0.699 (0.658,0.742)  |        | 0.71 (0.668,0.754)  |        |
|                                                                                                                            |                                           | 8              | 8564        | 0.706 (0.665,0.75)   |        | 0.709 (0.668,0.753)  |        | 0.732 (0.689,0.777)  |        | 0.731 (0.687,0.778)  |        | 0.737 (0.693,0.784) |        |
|                                                                                                                            |                                           | 9              | 8629        | 0.639 (0.603,0.677)  |        | 0.64 (0.604,0.678)   |        | 0.67 (0.632,0.71)    |        | 0.665 (0.625,0.707)  |        | 0.678 (0.638,0.721) |        |
|                                                                                                                            |                                           | 10             | 6877        | 0.557 (0.528,0.587)  |        | 0.557 (0.528,0.587)  |        | 0.61 (0.578,0.644)   |        | 0.61 (0.575,0.647)   |        | 0.633 (0.596,0.671) |        |
|                                                                                                                            | <b>EDI (deciles) in other areas</b>       | 1              | 16751       | 0.57 (0.492,0.66)    |        | 0.569 (0.491,0.66)   |        | 0.572 (0.494,0.663)  |        | 0.599 (0.516,0.694)  |        | 0.598 (0.515,0.694) |        |
|                                                                                                                            |                                           | 2              | 17342       | 0.616 (0.557,0.682)  |        | 0.615 (0.555,0.681)  |        | 0.619 (0.559,0.686)  |        | 0.634 (0.572,0.702)  |        | 0.635 (0.573,0.704) |        |
|                                                                                                                            |                                           | 3              | 12299       | 0.593 (0.546,0.644)  |        | 0.592 (0.545,0.643)  |        | 0.597 (0.549,0.648)  |        | 0.62 (0.571,0.674)   |        | 0.623 (0.573,0.678) |        |
|                                                                                                                            |                                           | 4              | 10802       | 0.596 (0.553,0.642)  |        | 0.595 (0.552,0.641)  |        | 0.602 (0.558,0.649)  |        | 0.613 (0.568,0.661)  |        | 0.614 (0.569,0.663) |        |
|                                                                                                                            |                                           | 5              | 11523       | 0.57 (0.528,0.616)   |        | 0.568 (0.526,0.614)  |        | 0.574 (0.531,0.62)   |        | 0.587 (0.543,0.635)  |        | 0.593 (0.548,0.641) |        |
|                                                                                                                            |                                           | 6              | 10898       | 0.613 (0.575,0.654)  |        | 0.612 (0.574,0.652)  |        | 0.621 (0.582,0.662)  |        | 0.624 (0.585,0.666)  |        | 0.633 (0.593,0.676) |        |
|                                                                                                                            |                                           | 7              | 10252       | 0.577 (0.54,0.616)   |        | 0.574 (0.538,0.613)  |        | 0.587 (0.55,0.627)   |        | 0.592 (0.554,0.633)  |        | 0.597 (0.558,0.638) |        |
|                                                                                                                            |                                           | 8              | 9432        | 0.53 (0.496,0.566)   |        | 0.528 (0.494,0.564)  |        | 0.543 (0.508,0.581)  |        | 0.55 (0.514,0.588)   |        | 0.555 (0.519,0.594) |        |
|                                                                                                                            |                                           | 9              | 11333       | 0.491 (0.459,0.525)  |        | 0.49 (0.458,0.524)   |        | 0.507 (0.474,0.543)  |        | 0.505 (0.471,0.541)  |        | 0.511 (0.477,0.548) |        |
|                                                                                                                            |                                           | 10             | 15976       | 0.452 (0.419,0.487)  |        | 0.45 (0.418,0.485)   |        | 0.476 (0.442,0.513)  |        | 0.479 (0.443,0.517)  |        | 0.486 (0.449,0.525) |        |
| <b>Age</b>                                                                                                                 | 40-45 y.o. <sup>1</sup>                   | 92964          |             | 1                    |        | 1                    |        | 1                    |        | 1                    |        | 1                   |        |
|                                                                                                                            | 45-50 y.o.                                | 94291          |             | 1.275 (1.247; 1.305) |        | 1.27 (1.242; 1.299)  |        | 1.271 (1.242; 1.3)   |        | 1.258 (1.229; 1.286) |        |                     |        |
| <b>CMU-C</b>                                                                                                               | No <sup>1</sup>                           | 172456         |             |                      |        | 1                    |        | 1                    |        | 1                    |        | 1                   |        |
|                                                                                                                            | Yes                                       | 14799          |             |                      |        | 0.614 (0.584; 0.645) |        | 0.613 (0.583; 0.645) |        | 0.597 (0.567; 0.627) |        |                     |        |
| <b>GP PLA (deciles)</b>                                                                                                    | 1 <sup>1</sup>                            | 4959           |             |                      |        |                      |        | 1                    |        | 1                    |        | 1                   |        |
|                                                                                                                            | 2                                         | 6486           |             |                      |        |                      |        | 1.091 (0.99; 1.204)  |        | 1.078 (0.978; 1.19)  |        |                     |        |
|                                                                                                                            | 3                                         | 7123           |             |                      |        |                      |        | 1.064 (0.967; 1.172) |        | 1.067 (0.969; 1.175) |        |                     |        |
|                                                                                                                            | 4                                         | 10062          |             |                      |        |                      |        | 1.057 (0.966; 1.157) |        | 1.044 (0.954; 1.144) |        |                     |        |
|                                                                                                                            | 5                                         | 14074          |             |                      |        |                      |        | 1.159 (1.063; 1.264) |        | 1.145 (1.05; 1.249)  |        |                     |        |
|                                                                                                                            | 6                                         | 17792          |             |                      |        |                      |        | 1.173 (1.078; 1.276) |        | 1.158 (1.064; 1.261) |        |                     |        |
|                                                                                                                            | 7                                         | 27034          |             |                      |        |                      |        | 1.217 (1.122; 1.321) |        | 1.201 (1.107; 1.305) |        |                     |        |
|                                                                                                                            | 8                                         | 33101          |             |                      |        |                      |        | 1.262 (1.165; 1.369) |        | 1.247 (1.151; 1.354) |        |                     |        |
|                                                                                                                            | 9                                         | 32681          |             |                      |        |                      |        | 1.193 (1.1; 1.295)   |        | 1.185 (1.092; 1.287) |        |                     |        |
|                                                                                                                            | 10                                        | 33943          |             |                      |        |                      |        | 1.14 (1.05; 1.239)   |        | 1.161 (1.069; 1.262) |        |                     |        |
| <b>Referring physician</b>                                                                                                 | No <sup>1</sup>                           | 13378          |             |                      |        |                      |        |                      |        | 1                    |        |                     |        |
|                                                                                                                            | Yes                                       | 173877         |             |                      |        |                      |        |                      |        | 6.849 (6.275; 7.493) |        |                     |        |

<sup>1</sup> Reference category

| Mammography uptake multivariable logistic regression models (n= 154895): in > 74 y.o. women (Mammography uptake = 5.65%) |                                           |                |             |                      |        |                      |        |                      |        |                      |        |                      |        |
|--------------------------------------------------------------------------------------------------------------------------|-------------------------------------------|----------------|-------------|----------------------|--------|----------------------|--------|----------------------|--------|----------------------|--------|----------------------|--------|
|                                                                                                                          |                                           |                | N           | Model 1              | LogLik | Model 2              | LogLik | Model 3              | LogLik | Model 4              | LogLik | Model 5              | LogLik |
|                                                                                                                          |                                           |                | Tot= 154895 | OR (95%CI)           | -33537 | OR (95%CI)           | -30948 | OR (95%CI)           | -30936 | OR (95%CI)           | -30890 | OR (95%CI)           | -30674 |
| <b>Combined EDI and large urban/other areas</b>                                                                          | <b>EDI (deciles) in large urban areas</b> | 1 <sup>2</sup> | 939         | 1                    |        | 1                    |        | 1                    |        | 1                    |        | 1                    |        |
|                                                                                                                          |                                           | 2              | 2115        | 1.022 (0.904,1.154)  |        | 1.026 (0.906,1.162)  |        | 0.983 (0.95,1.018)   |        | 0.998 (0.88,1.131)   |        | 0.994 (0.877,1.127)  |        |
|                                                                                                                          |                                           | 3              | 3983        | 0.968 (0.849,1.104)  |        | 1.009 (0.883,1.154)  |        | 0.971 (0.934,1.009)  |        | 0.978 (0.855,1.119)  |        | 0.973 (0.85,1.114)   |        |
|                                                                                                                          |                                           | 4              | 6092        | 0.921 (0.803,1.055)  |        | 0.921 (0.802,1.058)  |        | 0.939 (0.902,0.976)  |        | 0.883 (0.769,1.015)  |        | 0.88 (0.765,1.011)   |        |
|                                                                                                                          |                                           | 5              | 5757        | 0.893 (0.784,1.017)  |        | 0.956 (0.838,1.092)  |        | 0.897 (0.863,0.933)  |        | 0.898 (0.785,1.027)  |        | 0.892 (0.779,1.02)   |        |
|                                                                                                                          |                                           | 6              | 9950        | 0.891 (0.784,1.013)  |        | 0.945 (0.829,1.077)  |        | 0.936 (0.901,0.973)  |        | 0.878 (0.769,1.002)  |        | 0.873 (0.765,0.997)  |        |
|                                                                                                                          |                                           | 7              | 10334       | 0.896 (0.789,1.019)  |        | 0.973 (0.854,1.108)  |        | 0.858 (0.825,0.892)  |        | 0.88 (0.77,1.006)    |        | 0.879 (0.769,1.005)  |        |
|                                                                                                                          |                                           | 8              | 10647       | 0.99 (0.873,1.123)   |        | 1.088 (0.957,1.238)  |        | 0.885 (0.85,0.922)   |        | 0.987 (0.865,1.127)  |        | 0.982 (0.86,1.121)   |        |
|                                                                                                                          |                                           | 9              | 10974       | 0.926 (0.821,1.044)  |        | 1.029 (0.911,1.163)  |        | 0.855 (0.823,0.888)  |        | 0.89 (0.782,1.012)   |        | 0.886 (0.779,1.008)  |        |
|                                                                                                                          |                                           | 10             | 9307        | 0.899 (0.802,1.007)  |        | 0.977 (0.87,1.097)   |        | 0.763 (0.737,0.79)   |        | 0.837 (0.74,0.948)   |        | 0.835 (0.738,0.946)  |        |
|                                                                                                                          | <b>EDI (deciles) in other</b>             | 1              | 7482        | 0.77 (0.572,1.039)   |        | 0.765 (0.565,1.035)  |        | 0.784 (0.719,0.855)  |        | 0.793 (0.584,1.075)  |        | 0.786 (0.579,1.066)  |        |
|                                                                                                                          |                                           | 2              | 8759        | 0.78 (0.633,0.962)   |        | 0.767 (0.62,0.948)   |        | 0.845 (0.795,0.897)  |        | 0.791 (0.64,0.979)   |        | 0.782 (0.632,0.968)  |        |
|                                                                                                                          |                                           | 3              | 6862        | 0.701 (0.592,0.831)  |        | 0.708 (0.596,0.841)  |        | 0.817 (0.778,0.858)  |        | 0.742 (0.623,0.882)  |        | 0.733 (0.616,0.872)  |        |
|                                                                                                                          |                                           | 4              | 6193        | 0.645 (0.555,0.75)   |        | 0.671 (0.576,0.782)  |        | 0.833 (0.797,0.871)  |        | 0.662 (0.568,0.772)  |        | 0.659 (0.565,0.769)  |        |
|                                                                                                                          |                                           | 5              | 7566        | 0.539 (0.458,0.634)  |        | 0.552 (0.468,0.65)   |        | 0.78 (0.746,0.817)   |        | 0.55 (0.466,0.649)   |        | 0.547 (0.463,0.646)  |        |
|                                                                                                                          |                                           | 6              | 8023        | 0.696 (0.612,0.791)  |        | 0.726 (0.637,0.827)  |        | 0.838 (0.805,0.871)  |        | 0.692 (0.607,0.79)   |        | 0.686 (0.601,0.783)  |        |
|                                                                                                                          |                                           | 7              | 8076        | 0.65 (0.571,0.739)   |        | 0.696 (0.61,0.794)   |        | 0.824 (0.792,0.857)  |        | 0.657 (0.575,0.751)  |        | 0.65 (0.569,0.743)   |        |
|                                                                                                                          |                                           | 8              | 7774        | 0.728 (0.642,0.825)  |        | 0.774 (0.681,0.878)  |        | 0.833 (0.802,0.866)  |        | 0.727 (0.638,0.828)  |        | 0.717 (0.629,0.816)  |        |
|                                                                                                                          |                                           | 9              | 10269       | 0.706 (0.623,0.8)    |        | 0.776 (0.683,0.881)  |        | 0.762 (0.733,0.792)  |        | 0.728 (0.64,0.829)   |        | 0.72 (0.632,0.82)    |        |
|                                                                                                                          |                                           | 10             | 13793       | 0.693 (0.608,0.79)   |        | 0.757 (0.663,0.864)  |        | 0.718 (0.688,0.75)   |        | 0.675 (0.588,0.775)  |        | 0.666 (0.58,0.765)   |        |
| <b>Age</b>                                                                                                               | 75-80 y.o. <sup>2</sup>                   | 50815          |             | 1                    |        | 1                    |        | 1                    |        | 1                    |        | 1                    |        |
|                                                                                                                          | 80-85 y.o.                                | 48148          |             | 0.387 (0.368; 0.407) |        | 0.387 (0.368; 0.407) |        | 0.386 (0.367; 0.406) |        | 0.385 (0.366; 0.405) |        | 0.385 (0.366; 0.405) |        |
|                                                                                                                          | 85-90 y.o.                                | 34698          |             | 0.152 (0.14; 0.165)  |        | 0.152 (0.14; 0.165)  |        | 0.151 (0.139; 0.164) |        | 0.151 (0.139; 0.164) |        | 0.151 (0.139; 0.164) |        |
|                                                                                                                          | 90-95 y.o.                                | 16602          |             | 0.067 (0.057; 0.079) |        | 0.067 (0.057; 0.079) |        | 0.067 (0.057; 0.079) |        | 0.067 (0.056; 0.079) |        | 0.067 (0.056; 0.079) |        |
|                                                                                                                          | 95-100 y.o.                               | 4632           |             | 0.024 (0.013; 0.038) |        | 0.024 (0.013; 0.038) |        | 0.024 (0.013; 0.038) |        | 0.023 (0.013; 0.038) |        | 0.025 (0.014; 0.04)  |        |
| <b>CMU-C</b>                                                                                                             | No <sup>2</sup>                           | 153807         |             |                      |        | 1                    |        | 1                    |        | 1                    |        | 1                    |        |
|                                                                                                                          | Yes                                       | 1088           |             |                      |        | 0.443 (0.298; 0.63)  |        | 0.443 (0.298; 0.63)  |        | 0.439 (0.295; 0.625) |        | 0.439 (0.295; 0.625) |        |
| <b>GP PLA (deciles)</b>                                                                                                  | 1 <sup>2</sup>                            | 4675           |             |                      |        |                      |        | 1                    |        | 1                    |        | 1                    |        |
|                                                                                                                          | 2                                         | 5726           |             |                      |        |                      |        | 1.14 (0.94; 1.386)   |        | 1.138 (0.938; 1.383) |        | 1.138 (0.938; 1.383) |        |
|                                                                                                                          | 3                                         | 5537           |             |                      |        |                      |        | 1.037 (0.851; 1.265) |        | 1.035 (0.85; 1.263)  |        | 1.035 (0.85; 1.263)  |        |
|                                                                                                                          | 4                                         | 7717           |             |                      |        |                      |        | 1.091 (0.909; 1.314) |        | 1.085 (0.904; 1.306) |        | 1.085 (0.904; 1.306) |        |
|                                                                                                                          | 5                                         | 9569           |             |                      |        |                      |        | 1.171 (0.983; 1.399) |        | 1.17 (0.983; 1.399)  |        | 1.17 (0.983; 1.399)  |        |
|                                                                                                                          | 6                                         | 11747          |             |                      |        |                      |        | 1.25 (1.056; 1.486)  |        | 1.25 (1.055; 1.486)  |        | 1.25 (1.055; 1.486)  |        |
|                                                                                                                          | 7                                         | 18800          |             |                      |        |                      |        | 1.316 (1.12; 1.554)  |        | 1.312 (1.117; 1.549) |        | 1.312 (1.117; 1.549) |        |
|                                                                                                                          | 8                                         | 25658          |             |                      |        |                      |        | 1.441 (1.231; 1.694) |        | 1.44 (1.231; 1.695)  |        | 1.44 (1.231; 1.695)  |        |
|                                                                                                                          | 9                                         | 30207          |             |                      |        |                      |        | 1.398 (1.195; 1.644) |        | 1.403 (1.199; 1.65)  |        | 1.403 (1.199; 1.65)  |        |
|                                                                                                                          | 10                                        | 35259          |             |                      |        |                      |        | 1.546 (1.322; 1.818) |        | 1.555 (1.329; 1.829) |        | 1.555 (1.329; 1.829) |        |
| <b>Referring physician</b>                                                                                               | No <sup>2</sup>                           | 5992           |             |                      |        |                      |        |                      |        |                      |        | 1                    |        |
|                                                                                                                          | Yes                                       | 148903         |             |                      |        |                      |        |                      |        |                      |        | 8.938 (6.66; 12.37)  |        |

<sup>2</sup> Reference category

| Pap smear uptake multivariable logistic regression models (n= 63068) in 20-25 y.o. women (Pap smear uptake = 20.58 %) |                                           |                |                      |                      |                      |                      |                      |                      |                      |                      |                      |                      |  |
|-----------------------------------------------------------------------------------------------------------------------|-------------------------------------------|----------------|----------------------|----------------------|----------------------|----------------------|----------------------|----------------------|----------------------|----------------------|----------------------|----------------------|--|
|                                                                                                                       |                                           | N              | Model 1              | LogLik               | Model 2              | LogLik               | Model 3              | LogLik               | Model 4              | LogLik               | Model 5              | LogLik               |  |
|                                                                                                                       |                                           | Tot= 63068     | OR (95%CI)           | -31988               | OR (95%CI)           | -31676               | OR (95%CI)           | -31675               | OR (95%CI)           | -31670               | OR (95%CI)           | -30989               |  |
| <b>Combined EDI and large urban/other</b>                                                                             | <b>EDI (deciles) in large urban areas</b> | 1 <sup>3</sup> | 272                  | 1                    | 1                    | 1                    | 1                    | 1                    | 1                    | 1                    | 1                    | 1                    |  |
|                                                                                                                       | 2                                         | 600            | 0.958 (0.864; 1.062) |                      | 0.951 (0.858; 1.056) |                      | 0.952 (0.859; 1.057) |                      | 0.956 (0.861; 1.062) |                      | 0.941 (0.846; 1.046) |                      |  |
|                                                                                                                       | 3                                         | 1047           | 0.992 (0.888; 1.108) |                      | 0.985 (0.881; 1.101) |                      | 0.987 (0.882; 1.103) |                      | 0.987 (0.882; 1.105) |                      | 0.975 (0.87; 1.093)  |                      |  |
|                                                                                                                       | 4                                         | 1451           | 1.024 (0.914; 1.146) |                      | 1.021 (0.911; 1.143) |                      | 1.022 (0.913; 1.145) |                      | 1.029 (0.918; 1.154) |                      | 1.021 (0.91; 1.146)  |                      |  |
|                                                                                                                       | 5                                         | 1412           | 0.915 (0.823; 1.017) |                      | 0.905 (0.813; 1.007) |                      | 0.907 (0.815; 1.009) |                      | 0.922 (0.827; 1.028) |                      | 0.921 (0.825; 1.028) |                      |  |
|                                                                                                                       | 6                                         | 2197           | 0.896 (0.803; 0.999) |                      | 0.889 (0.797; 0.992) |                      | 0.892 (0.799; 0.995) |                      | 0.903 (0.808; 1.009) |                      | 0.895 (0.8; 1.002)   |                      |  |
|                                                                                                                       | 7                                         | 2336           | 0.92 (0.828; 1.023)  |                      | 0.901 (0.81; 1.002)  |                      | 0.903 (0.812; 1.005) |                      | 0.923 (0.827; 1.03)  |                      | 0.94 (0.841; 1.05)   |                      |  |
|                                                                                                                       | 8                                         | 2376           | 0.917 (0.824; 1.02)  |                      | 0.895 (0.804; 0.997) |                      | 0.898 (0.806; 1)     |                      | 0.925 (0.828; 1.033) |                      | 0.938 (0.838; 1.049) |                      |  |
|                                                                                                                       | 9                                         | 2575           | 0.824 (0.746; 0.909) |                      | 0.801 (0.726; 0.885) |                      | 0.804 (0.728; 0.889) |                      | 0.834 (0.751; 0.927) |                      | 0.858 (0.771; 0.954) |                      |  |
|                                                                                                                       | 10                                        | 2484           | 0.735 (0.67; 0.808)  |                      | 0.733 (0.667; 0.805) |                      | 0.739 (0.672; 0.812) |                      | 0.772 (0.697; 0.856) |                      | 0.802 (0.722; 0.89)  |                      |  |
|                                                                                                                       | <b>EDI (deciles) in other areas</b>       | 1              | 3700                 | 0.696 (0.498; 0.953) |                      | 0.701 (0.501; 0.961) |                      | 0.701 (0.501; 0.962) |                      | 0.701 (0.5; 0.962)   |                      | 0.729 (0.519; 1.005) |  |
|                                                                                                                       |                                           | 2              | 4599                 | 0.895 (0.723; 1.101) |                      | 0.903 (0.729; 1.112) |                      | 0.903 (0.729; 1.113) |                      | 0.904 (0.729; 1.114) |                      | 0.902 (0.726; 1.114) |  |
|                                                                                                                       |                                           | 3              | 3387                 | 0.938 (0.794; 1.105) |                      | 0.956 (0.809; 1.127) |                      | 0.957 (0.809; 1.128) |                      | 0.964 (0.814; 1.138) |                      | 0.963 (0.812; 1.139) |  |
|                                                                                                                       |                                           | 4              | 3098                 | 0.779 (0.669; 0.906) |                      | 0.78 (0.669; 0.908)  |                      | 0.781 (0.67; 0.909)  |                      | 0.788 (0.675; 0.917) |                      | 0.784 (0.671; 0.914) |  |
|                                                                                                                       |                                           | 5              | 4188                 | 0.846 (0.727; 0.983) |                      | 0.852 (0.731; 0.99)  |                      | 0.853 (0.732; 0.992) |                      | 0.859 (0.736; 0.999) |                      | 0.849 (0.727; 0.989) |  |
|                                                                                                                       |                                           | 6              | 3814                 | 0.839 (0.737; 0.955) |                      | 0.849 (0.745; 0.966) |                      | 0.85 (0.746; 0.967)  |                      | 0.858 (0.752; 0.977) |                      | 0.849 (0.744; 0.969) |  |
|                                                                                                                       |                                           | 7              | 4205                 | 0.835 (0.735; 0.948) |                      | 0.838 (0.737; 0.951) |                      | 0.84 (0.739; 0.954)  |                      | 0.855 (0.751; 0.972) |                      | 0.837 (0.735; 0.954) |  |
|                                                                                                                       |                                           | 8              | 4074                 | 0.77 (0.677; 0.875)  |                      | 0.776 (0.682; 0.882) |                      | 0.778 (0.683; 0.885) |                      | 0.789 (0.692; 0.899) |                      | 0.78 (0.683; 0.89)   |  |
|                                                                                                                       |                                           | 9              | 6237                 | 0.797 (0.704; 0.902) |                      | 0.809 (0.713; 0.916) |                      | 0.812 (0.716; 0.919) |                      | 0.823 (0.725; 0.934) |                      | 0.826 (0.726; 0.939) |  |
|                                                                                                                       |                                           | 10             | 9016                 | 0.655 (0.574; 0.746) |                      | 0.661 (0.579; 0.754) |                      | 0.665 (0.582; 0.758) |                      | 0.688 (0.6; 0.787)   |                      | 0.701 (0.61; 0.803)  |  |
| <b>Age</b>                                                                                                            | 20-21y.o. <sup>3</sup>                    | 9827           |                      |                      | 1                    |                      | 1                    |                      | 1                    |                      | 1                    |                      |  |
|                                                                                                                       | 21-22 y.o.                                | 11080          |                      |                      | 1.234 (1.144; 1.33)  |                      | 1.233 (1.144; 1.33)  |                      | 1.234 (1.144; 1.33)  |                      | 1.205 (1.117; 1.3)   |                      |  |
|                                                                                                                       | 22-23 y.o.                                | 12631          |                      |                      | 1.516 (1.411; 1.628) |                      | 1.514 (1.41; 1.626)  |                      | 1.516 (1.412; 1.628) |                      | 1.435 (1.335; 1.543) |                      |  |
|                                                                                                                       | 23-24 y.o.                                | 14064          |                      |                      | 1.709 (1.595; 1.832) |                      | 1.707 (1.593; 1.83)  |                      | 1.711 (1.597; 1.834) |                      | 1.576 (1.47; 1.691)  |                      |  |
|                                                                                                                       | 24-25 y.o.                                | 15466          |                      |                      | 2.102 (1.966; 2.249) |                      | 2.099 (1.963; 2.246) |                      | 2.104 (1.967; 2.25)  |                      | 1.912 (1.787; 2.047) |                      |  |
| <b>CMU-C</b>                                                                                                          | No <sup>3</sup>                           | 54768          |                      |                      |                      |                      | 1                    |                      | 1                    |                      | 1                    |                      |  |
|                                                                                                                       | Yes                                       | 8300           |                      |                      |                      |                      | 0.968 (0.911; 1.028) |                      | 0.969 (0.912; 1.029) |                      | 0.899 (0.845; 0.955) |                      |  |
| <b>GP PLA (deciles)</b>                                                                                               | 1 <sup>3</sup>                            | 1167           |                      |                      |                      |                      |                      |                      | 1                    |                      | 1                    |                      |  |
|                                                                                                                       | 2                                         | 1569           |                      |                      |                      |                      |                      |                      | 1.057 (0.873; 1.281) |                      | 1.033 (0.851; 1.254) |                      |  |
|                                                                                                                       | 3                                         | 1626           |                      |                      |                      |                      |                      |                      | 1.09 (0.903; 1.318)  |                      | 1.069 (0.884; 1.295) |                      |  |
|                                                                                                                       | 4                                         | 2498           |                      |                      |                      |                      |                      |                      | 1.096 (0.92; 1.307)  |                      | 1.075 (0.902; 1.285) |                      |  |
|                                                                                                                       | 5                                         | 3594           |                      |                      |                      |                      |                      |                      | 1.07 (0.906; 1.268)  |                      | 1.055 (0.891; 1.252) |                      |  |
|                                                                                                                       | 6                                         | 4813           |                      |                      |                      |                      |                      |                      | 1.026 (0.872; 1.21)  |                      | 1.018 (0.864; 1.203) |                      |  |
|                                                                                                                       | 7                                         | 7959           |                      |                      |                      |                      |                      |                      | 1.055 (0.902; 1.238) |                      | 1.039 (0.887; 1.222) |                      |  |
|                                                                                                                       | 8                                         | 10982          |                      |                      |                      |                      |                      |                      | 1.074 (0.92; 1.257)  |                      | 1.054 (0.902; 1.236) |                      |  |
|                                                                                                                       | 9                                         | 12533          |                      |                      |                      |                      |                      |                      | 1.021 (0.875; 1.196) |                      | 1.011 (0.865; 1.186) |                      |  |
|                                                                                                                       | 10                                        | 16327          |                      |                      |                      |                      |                      |                      | 0.986 (0.845; 1.155) |                      | 1.004 (0.859; 1.178) |                      |  |
| <b>Referring physician</b>                                                                                            | No <sup>3</sup>                           | 13716          |                      |                      |                      |                      |                      |                      |                      |                      | 1                    |                      |  |
|                                                                                                                       | Yes                                       | 49352          |                      |                      |                      |                      |                      |                      |                      |                      | 2.859 (2.69; 3.042)  |                      |  |

<sup>3</sup> Reference category

| Pap smear uptake multivariable logistic regression models (n= 252156) in > 65 y.o. women (Pap smear uptake = 5.69%) |                                           |                                     |                     |                     |                      |                     |                      |                     |                      |                     |                       |                     |                    |
|---------------------------------------------------------------------------------------------------------------------|-------------------------------------------|-------------------------------------|---------------------|---------------------|----------------------|---------------------|----------------------|---------------------|----------------------|---------------------|-----------------------|---------------------|--------------------|
|                                                                                                                     |                                           | N                                   | Model 1             | LogLik              | Model 2              | LogLik              | Model 3              | LogLik              | Model 4              | LogLik              | Model 5               | LogLik              |                    |
|                                                                                                                     |                                           | Tot= 252156                         | OR (95%CI)          | -54676              | OR (95%CI)           | -48204              | OR (95%CI)           | -48196              | OR (95%CI)           | -48125              | OR (95%CI)            | -47675              |                    |
| <b>Combined EDI and large urban/other areas</b>                                                                     | <b>EDI (deciles) in large urban areas</b> | 1 <sup>4</sup>                      | 1669                | 1                   | 1                    | 1                   | 1                    | 1                   | 1                    | 1                   | 1                     | 1                   |                    |
|                                                                                                                     | 2                                         | 3720                                | 0.875 (0.805,0.951) |                     | 0.904 (0.83,0.985)   |                     | 0.905 (0.83,0.985)   |                     | 0.874 (0.801,0.953)  |                     | 0.865 (0.793,0.944)   |                     |                    |
|                                                                                                                     | 3                                         | 6672                                | 0.822 (0.75,0.901)  |                     | 0.903 (0.821,0.992)  |                     | 0.903 (0.821,0.992)  |                     | 0.874 (0.795,0.961)  |                     | 0.866 (0.787,0.953)   |                     |                    |
|                                                                                                                     | 4                                         | 9800                                | 0.786 (0.714,0.865) |                     | 0.859 (0.779,0.948)  |                     | 0.86 (0.78,0.949)    |                     | 0.825 (0.748,0.911)  |                     | 0.817 (0.74,0.902)    |                     |                    |
|                                                                                                                     | 5                                         | 9294                                | 0.743 (0.677,0.815) |                     | 0.858 (0.78,0.944)   |                     | 0.859 (0.782,0.945)  |                     | 0.809 (0.735,0.891)  |                     | 0.805 (0.731,0.887)   |                     |                    |
|                                                                                                                     | 6                                         | 15807                               | 0.641 (0.584,0.705) |                     | 0.738 (0.669,0.813)  |                     | 0.738 (0.67,0.813)   |                     | 0.687 (0.622,0.758)  |                     | 0.679 (0.615,0.749)   |                     |                    |
|                                                                                                                     | 7                                         | 16336                               | 0.69 (0.628,0.757)  |                     | 0.833 (0.757,0.917)  |                     | 0.834 (0.757,0.918)  |                     | 0.763 (0.691,0.842)  |                     | 0.764 (0.692,0.843)   |                     |                    |
|                                                                                                                     | 8                                         | 16801                               | 0.796 (0.727,0.872) |                     | 0.982 (0.894,1.079)  |                     | 0.984 (0.895,1.081)  |                     | 0.898 (0.815,0.99)   |                     | 0.895 (0.812,0.987)   |                     |                    |
|                                                                                                                     | 9                                         | 17022                               | 0.685 (0.628,0.748) |                     | 0.855 (0.781,0.936)  |                     | 0.858 (0.784,0.94)   |                     | 0.748 (0.68,0.823)   |                     | 0.745 (0.677,0.82)    |                     |                    |
|                                                                                                                     | 10                                        | 14130                               | 0.647 (0.596,0.702) |                     | 0.789 (0.725,0.858)  |                     | 0.795 (0.73,0.865)   |                     | 0.68 (0.621,0.745)   |                     | 0.678 (0.619,0.743)   |                     |                    |
|                                                                                                                     |                                           | <b>EDI (deciles) in other areas</b> | 1                   | 14042               | 0.641 (0.517,0.795)  |                     | 0.669 (0.537,0.834)  |                     | 0.668 (0.536,0.833)  |                     | 0.693 (0.555,0.865)   |                     | 0.687 (0.55,0.858) |
|                                                                                                                     |                                           | 2                                   | 15838               | 0.571 (0.488,0.669) |                      | 0.6 (0.511,0.705)   |                      | 0.6 (0.511,0.704)   |                      | 0.616 (0.524,0.724) |                       | 0.607 (0.516,0.714) |                    |
|                                                                                                                     |                                           | 3                                   | 11781               | 0.556 (0.49,0.63)   |                      | 0.616 (0.542,0.7)   |                      | 0.616 (0.542,0.7)   |                      | 0.635 (0.558,0.723) |                       | 0.628 (0.551,0.715) |                    |
|                                                                                                                     |                                           | 4                                   | 10633               | 0.522 (0.467,0.583) |                      | 0.61 (0.545,0.683)  |                      | 0.61 (0.545,0.683)  |                      | 0.603 (0.538,0.676) |                       | 0.596 (0.532,0.668) |                    |
|                                                                                                                     |                                           | 5                                   | 12461               | 0.456 (0.405,0.513) |                      | 0.524 (0.464,0.591) |                      | 0.524 (0.464,0.591) |                      | 0.526 (0.466,0.594) |                       | 0.519 (0.459,0.586) |                    |
|                                                                                                                     |                                           | 6                                   | 13160               | 0.5 (0.454,0.55)    |                      | 0.598 (0.542,0.659) |                      | 0.598 (0.542,0.659) |                      | 0.577 (0.522,0.637) |                       | 0.569 (0.515,0.629) |                    |
|                                                                                                                     |                                           | 7                                   | 12897               | 0.497 (0.452,0.547) |                      | 0.599 (0.544,0.66)  |                      | 0.6 (0.544,0.661)   |                      | 0.572 (0.518,0.631) |                       | 0.564 (0.511,0.623) |                    |
|                                                                                                                     |                                           | 8                                   | 12297               | 0.508 (0.463,0.558) |                      | 0.612 (0.556,0.673) |                      | 0.612 (0.556,0.674) |                      | 0.579 (0.525,0.639) |                       | 0.57 (0.516,0.629)  |                    |
|                                                                                                                     |                                           | 9                                   | 15991               | 0.436 (0.396,0.481) |                      | 0.535 (0.484,0.591) |                      | 0.535 (0.485,0.591) |                      | 0.503 (0.454,0.556) |                       | 0.495 (0.447,0.548) |                    |
|                                                                                                                     |                                           | 10                                  | 21805               | 0.461 (0.416,0.51)  |                      | 0.587 (0.529,0.651) |                      | 0.589 (0.53,0.653)  |                      | 0.528 (0.474,0.588) |                       | 0.519 (0.466,0.578) |                    |
| <b>Age</b>                                                                                                          | 65-70 y.o. <sup>4</sup>                   | 48684                               |                     |                     | 1                    |                     | 1                    |                     | 1                    |                     | 1                     |                     |                    |
|                                                                                                                     | 70-75 y.o.                                | 48577                               |                     |                     | 0.583 (0.56; 0.607)  |                     | 0.582 (0.559; 0.606) |                     | 0.581 (0.558; 0.605) |                     | 0.578 (0.555; 0.601)  |                     |                    |
|                                                                                                                     | 75-80 y.o.                                | 50815                               |                     |                     | 0.252 (0.24; 0.266)  |                     | 0.252 (0.239; 0.265) |                     | 0.251 (0.238; 0.264) |                     | 0.247 (0.234; 0.26)   |                     |                    |
|                                                                                                                     | 80-85 y.o.                                | 48148                               |                     |                     | 0.094 (0.087; 0.102) |                     | 0.094 (0.087; 0.101) |                     | 0.093 (0.086; 0.101) |                     | 0.092 (0.085; 0.099)  |                     |                    |
|                                                                                                                     | 85-90 y.o.                                | 34698                               |                     |                     | 0.03 (0.026; 0.035)  |                     | 0.03 (0.026; 0.035)  |                     | 0.03 (0.026; 0.035)  |                     | 0.029 (0.025; 0.034)  |                     |                    |
|                                                                                                                     | 90-95 y.o.                                | 16602                               |                     |                     | 0.013 (0.01; 0.018)  |                     | 0.013 (0.01; 0.018)  |                     | 0.013 (0.009; 0.018) |                     | 0.013 (0.009; 0.018)  |                     |                    |
|                                                                                                                     | 95-100 y.o.                               | 4632                                |                     |                     | 0.005 (0.002; 0.012) |                     | 0.005 (0.002; 0.012) |                     | 0.005 (0.002; 0.012) |                     | 0.005 (0.002; 0.012)  |                     |                    |
| <b>CMU-C</b>                                                                                                        | No <sup>4</sup>                           | 249945                              |                     |                     |                      |                     | 1                    |                     | 1                    |                     | 1                     |                     |                    |
|                                                                                                                     | Yes                                       | 2211                                |                     |                     |                      |                     | 0.68 (0.558; 0.821)  |                     | 0.676 (0.555; 0.816) |                     | 0.67 (0.55; 0.809)    |                     |                    |
| <b>GP PLA (deciles)</b>                                                                                             | 1 <sup>4</sup>                            | 7805                                |                     |                     |                      |                     |                      |                     | 1                    |                     | 1                     |                     |                    |
|                                                                                                                     | 2                                         | 9343                                |                     |                     |                      |                     |                      |                     | 0.85 (0.731; 0.989)  |                     | 0.842 (0.724; 0.98)   |                     |                    |
|                                                                                                                     | 3                                         | 9254                                |                     |                     |                      |                     |                      |                     | 0.885 (0.763; 1.028) |                     | 0.886 (0.763; 1.029)  |                     |                    |
|                                                                                                                     | 4                                         | 12955                               |                     |                     |                      |                     |                      |                     | 1.004 (0.877; 1.151) |                     | 0.995 (0.869; 1.141)  |                     |                    |
|                                                                                                                     | 5                                         | 16421                               |                     |                     |                      |                     |                      |                     | 1.054 (0.927; 1.202) |                     | 1.053 (0.926; 1.201)  |                     |                    |
|                                                                                                                     | 6                                         | 19914                               |                     |                     |                      |                     |                      |                     | 1.088 (0.96; 1.237)  |                     | 1.08 (0.952; 1.227)   |                     |                    |
|                                                                                                                     | 7                                         | 31912                               |                     |                     |                      |                     |                      |                     | 1.147 (1.017; 1.296) |                     | 1.14 (1.011; 1.289)   |                     |                    |
|                                                                                                                     | 8                                         | 42273                               |                     |                     |                      |                     |                      |                     | 1.223 (1.087; 1.379) |                     | 1.214 (1.08; 1.37)    |                     |                    |
|                                                                                                                     | 9                                         | 47761                               |                     |                     |                      |                     |                      |                     | 1.282 (1.14; 1.446)  |                     | 1.282 (1.14; 1.446)   |                     |                    |
|                                                                                                                     | 10                                        | 54518                               |                     |                     |                      |                     |                      |                     | 1.319 (1.173; 1.488) |                     | 1.327 (1.179; 1.497)  |                     |                    |
| <b>Referring physician</b>                                                                                          | No <sup>4</sup>                           | 10487                               |                     |                     |                      |                     |                      |                     |                      |                     | 1                     |                     |                    |
|                                                                                                                     | Yes                                       | 241669                              |                     |                     |                      |                     |                      |                     |                      |                     | 9.629 (7.764; 12.133) |                     |                    |

<sup>4</sup> Reference category
